# Supplementary material for: Prey-size plastics are invading larval fish nurseries
Source: PubMed Central journal article supplement — Proc Natl Acad Sci U S A. 2019 Nov 11;116(48):24143–9. doi: 10.1073/pnas.1907496116 (PMC6883795; doi:10.1073/pnas.1907496116), 2019-11-11
Supplement: pnas.1907496116.sapp.pdf [file pnas.1907496116.sapp.pdf]

# Supporting Information Appendix

## Prey-size plastics are invading larval fish nurseries

Jamison M. Gove<sup>1,\*†</sup>, Jonathan L. Whitney<sup>1,2,†</sup>, Margaret A. McManus<sup>3</sup>, Joey Lecky<sup>1,4</sup>, Felipe C. Carvalho<sup>1</sup>, Jennifer M. Lynch<sup>5,6</sup>, Jiwei Li<sup>7</sup>, Philipp Neubauer<sup>8</sup>, Katharine A. Smith<sup>3</sup>, Jana E. Phipps<sup>1,2</sup>, Donald R. Kobayashi<sup>1</sup>, Karla B. Balagso<sup>1</sup>, Emily A. Contreras<sup>1,2</sup>, Mark E. Manuel<sup>9,10</sup>, Mark A. Merrifield<sup>11</sup>, Jeffrey J. Polovina<sup>1</sup>, Gregory P. Asner<sup>7</sup>, Jeffrey A. Maynard<sup>12</sup>, and Gareth J. Williams<sup>13</sup>

<sup>1</sup>Pacific Islands Fisheries Science Center, National Oceanic and Atmospheric Administration, Honolulu, HI 96818, USA. <sup>2</sup>Joint Institute for Marine and Atmospheric Research, University of Hawai'i at Mānoa, Honolulu, HI 96812, USA. <sup>3</sup>Department of Oceanography, University of Hawai'i at Mānoa, Honolulu, HI 96812, USA. <sup>4</sup>Lynker Technologies, Leesburg, VA 20175, USA. <sup>5</sup>Chemical Sciences Division, National Institute of Standards and Technology, Waimanalo, HI 96795, USA. <sup>6</sup>Center for Marine Debris Research, Hawai'i Pacific University, Waimanalo, HI 96795, USA. <sup>7</sup>Center for Global Discovery and Conservation Science, Arizona State University, Tempe, AZ 85281, USA. <sup>8</sup>Dragonfly Data Science, Te Aro, Wellington 6011, New Zealand. <sup>9</sup>Marine Debris Program, National Oceanic and Atmospheric Administration, Honolulu, HI 96818, USA. <sup>10</sup>Freestone Environmental Services, Richland, WA 99352, USA. <sup>11</sup>Center for Climate Change Impacts and Adaptation, Scripps Institution of Oceanography, La Jolla, CA 92037, USA. <sup>12</sup>SymbioSeas, Carolina Beach, NC 28428, USA. <sup>13</sup>School of Ocean Sciences, Bangor University, Menai Bridge, Anglesey LL59 5AB, UK. <sup>†</sup>These authors contributed equally to this work

\* Corresponding author. Email: jamison.gove@noaa.gov; Phone: 808.725.5570

### **This PDF file includes:**

Supporting Methods  
Supporting Figs. S1 to S2  
Supporting Tables S1 to S3

## Methods

*Polymer identification.* A subset of particles and microfibers ingested by larval fish were selected for polymer identification using both Raman microscopy (Kaiser Optical Systems, Inc. Raman RXN Systems Raman microprobe with an Invictus 785 nm laser and Leica DMLP microscope) and attenuated total reflectance Fourier transform infrared microscopy (ATR FT-IR; Thermo Fisher Scientific Nicolet iN10 MX with an MCT detector) (SI Appendix, Table S3). Glass and foil supplies were baked at 450°C for 5 hr and samples were handled under a HEPA hood to minimize contamination. Plastic vials containing the sample particles in 70% ethanol were centrifuged at 7,800 rcf for 5 min. Samples plus ethanol rinses were transferred with glass pipets into aluminum Chemplex pellet cups. Cups were covered with foil and dried at 110 °C for ~20 min. Three additional cups received ethanol and were handled identically as the sample cups to serve as laboratory blanks. Under visible light, photographs of particles were taken with 2.5x, 10x, and 50x objectives and compared to original photographs to assure the original fiber was recovered. At the University of Hawai‘i at Mānoa, under the 50x objective, a Raman spectrum was captured using a 785 nm laser producing approximately 33 μW of power. Multiple spectra were captured on each particle. Raman spectra were background subtracted and fast Fourier transform smoothed before searching through the KnowItAll library (Bio-Rad, Hercules, CA). The fibers were placed between two glass microscope slides wrapped in tape and shipped to Thermo Fisher Scientific where they were scanned using a Nicolet iN10 MX Fourier transform infrared spectroscopy microscope using the microATR accessory and an MCT detector. The spectra were searched through multiple libraries. Matches >70% from the Raman and IR spectra were assessed for a final identification. Cellulose with pigment or chemical additives detected were determined as artificial or anthropogenic in origin.

*Disclaimer:* Certain commercial equipment, instruments, or materials are identified in this paper to specify adequately the experimental procedure. Such identification does not imply recommendation or endorsement by the National Institute of Standards and Technology, nor does it imply that the materials or equipment identified are necessarily the best available for the purpose

*Remote sensing.* We applied an object-based supervised classification approach to identify surface slicks using the eCognition software (<http://ecognition.com>). An object-based method was selected because it can be tuned to detect the distinct long ribbon shape of the surface slicks (1). First, we used a region-based multiresolution segmentation to partition images into objects (2). Following that step, the blue, green and near-infrared spectral channels were utilized in a nearest neighbor classifier to identify surface slicks, regular seawater, land and other surfaces. Along with the spectral channels, morphological shape (shape index =  $\text{Perimeter}/4 * \sqrt{\text{area}}$ ) and area (number of pixels) indices of the object features were also applied in the classification. After the surface slick extents were derived, a manual clean-up of the data was undertaken to ensure that only surface slicks were included in the data products.

1. T. Blaschke, Object based image analysis for remote sensing. *ISPRS J. Photogr. Rem. Sens.* **65**, 2-16 (2010).
2. U. C. Benz, P. Hofmann, G. Willhauck, I. Lingenfelder, M. Heynen, Multi-resolution, object-oriented fuzzy analysis of remote sensing data for GIS-ready information. *ISPRS J. Photogr. Rem. Sens.* **58**, 239-258 (2004).

SI Appendix Figures and Tables

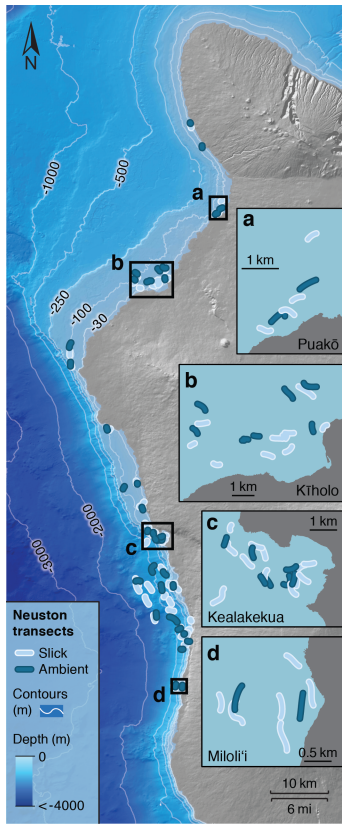

**Fig. S1.** Location of neuston tows ( $n = 100$ ) collected along the west coast of Hawai'i Island.

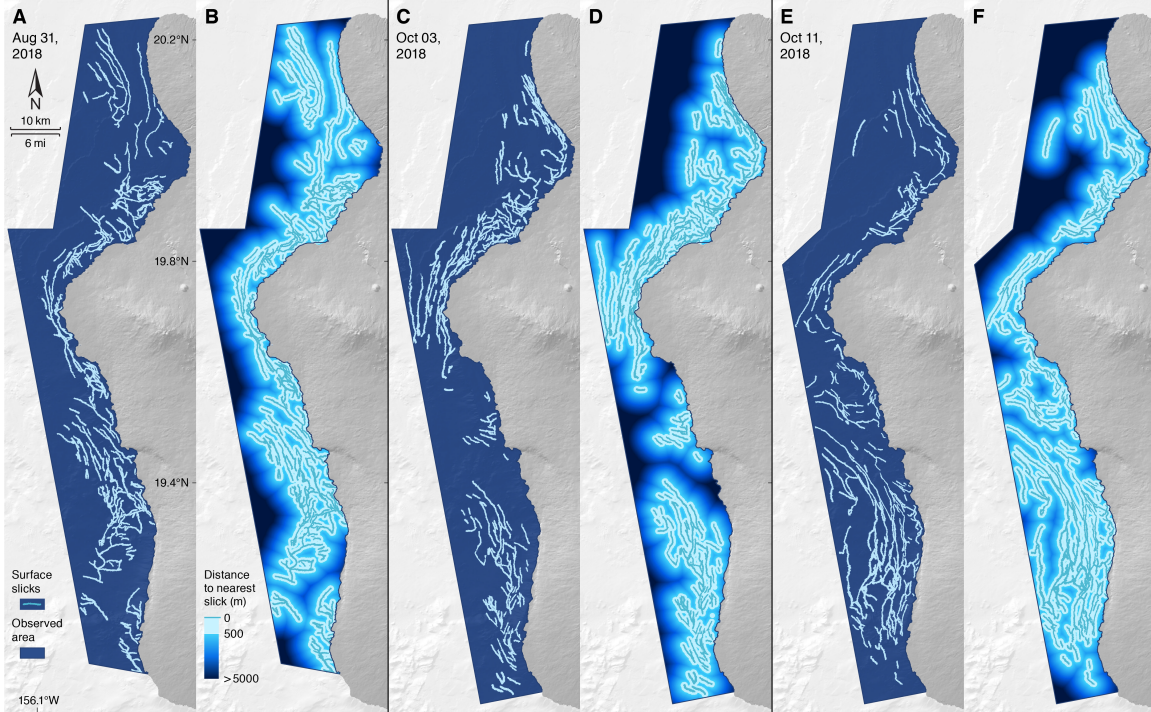

**Fig. S2. Remotely sensed surface slicks along the west coast of Hawai'i Island.** Remotely sensed observations of surface slicks and distance to nearest slick as shown in Fig. 1 but for 31 August 2018 (**A, B**), 03 October 2018 (**C, D**), and 11 October 2018 (**E, F**). The spatial extent of remote sensing detection is shown as shaded regions in each panel. The area of surface slicks and ambient waters as a percentage of the study area and the percent area of ambient waters that are within 500m of a surface slick for each time point are as follows: **A**, 8.8% (88 km<sup>2</sup>/998 km<sup>2</sup>), 91.2% (910 km<sup>2</sup>/998 km<sup>2</sup>) and **B**, 49.2% (448 km<sup>2</sup>/910 km<sup>2</sup>); **C**, 9.1% (94 km<sup>2</sup>/1,037 km<sup>2</sup>), 90.9% (943 km<sup>2</sup>/1,037 km<sup>2</sup>), and **D**, 47.3% (446 km<sup>2</sup>/943 km<sup>2</sup>); **E**, 6.5% (67 km<sup>2</sup>/1037 km<sup>2</sup>), 93.5% (970 km<sup>2</sup>/1037 km<sup>2</sup>), and **F**, 47.0% (456 km<sup>2</sup>/970 km<sup>2</sup>).



**Table S1.** Densities and geographic information for all neuston tow samples included in the study.

| Transect | Tow Location<br>(Inside or<br>Outside Slick) | Year | Longitude<br>(Degrees) | Latitude<br>(Degrees) | Platform   | Distance To<br>Shore (m) | Slick Width<br>(m) | Tow<br>Length<br>(m) | Volume<br>Sampled<br>(m <sup>3</sup> ) | Net Mouth<br>Area (m <sup>2</sup> ) | Chlorophyll-a<br>Density<br>(mg m <sup>-3</sup> ) | Zooplankton<br>Density<br>(individuals m <sup>-3</sup> ) | Zooplankton (1mm)<br>Density<br>(individuals m <sup>-3</sup> ) |
|----------|----------------------------------------------|------|------------------------|-----------------------|------------|--------------------------|--------------------|----------------------|----------------------------------------|-------------------------------------|---------------------------------------------------|----------------------------------------------------------|----------------------------------------------------------------|
| 1        | Inside                                       | 2016 | -155.94781             | 19.47386              | small boat | 1068                     | 5-10               | 493                  | 62.8                                   | 0.79                                | NA                                                | 228.025                                                  | 93.22                                                          |
| 2        | Outside                                      | 2016 | -155.94123             | 19.46769              | small boat | 1299                     | NA                 | 475                  | 183.7                                  | 0.79                                | NA                                                | 59.641                                                   | 10.85                                                          |
| 4        | Outside                                      | 2016 | -156.01814             | 19.63887              | small boat | 800                      | NA                 | 486                  | 344.4                                  | 0.79                                | NA                                                | 75.459                                                   | NA                                                             |
| 5        | Inside                                       | 2016 | -156.01381             | 19.63779              | small boat | 665                      | 1-5                | 543                  | 375.9                                  | 0.79                                | NA                                                | 88.045                                                   | 59.74                                                          |
| 8        | Inside                                       | 2016 | -155.93052             | 19.47164              | small boat | 825                      | 20-30              | 498                  | 278.7                                  | 0.79                                | NA                                                | 1289.903                                                 | 167.38                                                         |
| 9        | Outside                                      | 2016 | -155.93417             | 19.46715              | small boat | 1056                     | NA                 | 557                  | 335.8                                  | 0.79                                | NA                                                | 61.822                                                   | 13.79                                                          |
| 10       | Inside                                       | 2016 | -155.93289             | 19.46457              | small boat | 747                      | 20-30              | 468                  | 217.2                                  | 0.79                                | NA                                                | 148.071                                                  | 42.44                                                          |
| 13       | Outside                                      | 2016 | -155.99205             | 19.54771              | small boat | 2701                     | NA                 | 498                  | 355.3                                  | 0.79                                | 0.0919                                            | 2.53                                                     | NA                                                             |
| 14       | Inside                                       | 2016 | -155.97263             | 19.55593              | small boat | 625                      | 1-5                | 496                  | 351.8                                  | 0.79                                | 0.265                                             | 828.448                                                  | 324.23                                                         |
| 15       | Outside                                      | 2016 | -155.97098             | 19.55402              | small boat | 427                      | NA                 | 488                  | 323.6                                  | 0.79                                | 0.1193                                            | 319.852                                                  | 166.55                                                         |
| 16       | Inside                                       | 2016 | -155.91289             | 19.39844              | small boat | 211                      | 20-30              | 217                  | 193.9                                  | 0.79                                | 0.2485                                            | 622.837                                                  | 114.29                                                         |
| 17       | Inside                                       | 2016 | -155.90835             | 19.39077              | small boat | 97                       | 10-20              | 525                  | 193.6                                  | 0.79                                | 0.5652                                            | 1196.199                                                 | 524.46                                                         |
| 18       | Inside                                       | 2016 | -155.91387             | 19.39734              | small boat | 320                      | 5-10               | 420                  | 332.4                                  | 0.79                                | 0.8116                                            | 775.451                                                  | 166.84                                                         |
| 19       | Inside                                       | 2016 | -155.92199             | 19.39797              | small boat | 1168                     | 10-20              | 426                  | 309                                    | 0.79                                | NA                                                | 199.871                                                  | NA                                                             |
| 20       | Outside                                      | 2016 | -155.91523             | 19.39541              | small boat | 470                      | NA                 | 481                  | 306                                    | 0.79                                | 0.3251                                            | 298.392                                                  | 30.99                                                          |
| 21       | Inside                                       | 2016 | -155.96132             | 19.52480              | small boat | 463                      | 30-100             | 372                  | 299.5                                  | 0.79                                | 0.3002                                            | 31.679                                                   | NA                                                             |
| 22       | Inside                                       | 2016 | -155.96671             | 19.51897              | small boat | 626                      | 20-30              | 295                  | 275.8                                  | 0.79                                | 0.1781                                            | 4.333                                                    | 2.69                                                           |
| 23       | Outside                                      | 2016 | -155.96306             | 19.51525              | small boat | 334                      | NA                 | 498                  | 317.7                                  | 0.79                                | 0.1926                                            | 4.441                                                    | 2.83                                                           |
| 24       | Inside                                       | 2016 | -155.96219             | 19.51557              | small boat | 239                      | 10-20              | 370                  | 217.7                                  | 0.79                                | 0.1377                                            | 64.272                                                   | 40.97                                                          |
| 26       | Inside                                       | 2016 | -155.89024             | 19.32586              | small boat | 151                      | 20-30              | 448                  | 378                                    | 0.79                                | 0.1574                                            | 512.17                                                   | 166.9                                                          |
| 27       | Inside                                       | 2016 | -155.89128             | 19.32706              | small boat | 323                      | 1-5                | 454                  | 302.4                                  | 0.79                                | 0.588                                             | 192.884                                                  | 146.93                                                         |
| 28       | Inside                                       | 2016 | -155.88814             | 19.34190              | small boat | 222                      | 30-100             | 460                  | 325.1                                  | 0.79                                | 0.6646                                            | 2578.308                                                 | 409.08                                                         |
| 29       | Inside                                       | 2016 | -155.90521             | 19.33008              | small boat | 1727                     | 20-30              | 508                  | 403.8                                  | 0.79                                | 0.2174                                            | 48.898                                                   | 33.67                                                          |
| 30       | Outside                                      | 2016 | -155.90574             | 19.32865              | small boat | 1727                     | NA                 | 507                  | 213.4                                  | 0.79                                | 0.1615                                            | 9.695                                                    | NA                                                             |
| 31       | Inside                                       | 2016 | -155.94217             | 19.47651              | small boat | 548                      | 5-10               | 371                  | 370.4                                  | 0.79                                | 0.1801                                            | 44.371                                                   | 22.55                                                          |
| 32       | Inside                                       | 2016 | -155.95338             | 19.48511              | small boat | 359                      | 1-5                | 216                  | 153.4                                  | 0.79                                | 0.1284                                            | 101.786                                                  | 27.71                                                          |
| 33       | Inside                                       | 2016 | -155.94185             | 19.46967              | small boat | 1121                     | 5-10               | 368                  | 350.4                                  | 0.79                                | 0.1441                                            | 41.61                                                    | 20.31                                                          |
| 34       | Inside                                       | 2016 | -155.93145             | 19.46760              | small boat | 885                      | 20-30              | 426                  | 413.5                                  | 0.79                                | 0.323                                             | 289.625                                                  | 0                                                              |
| 35       | Outside                                      | 2016 | -155.93241             | 19.46809              | small boat | 999                      | NA                 | 404                  | 393.6                                  | 0.79                                | 0.2008                                            | 134.64                                                   | 28.34                                                          |
| 36       | Inside                                       | 2016 | -155.92337             | 19.87219              | small boat | 116                      | 5-10               | 308                  | 123.5                                  | 0.79                                | 0.3478                                            | 1581.085                                                 | 358.09                                                         |
| 37       | Inside                                       | 2016 | -155.94595             | 19.86081              | small boat | 748                      | 30-100             | 416                  | 266.7                                  | 0.79                                | 0.2692                                            | 552.712                                                  | 242.76                                                         |
| 38       | Outside                                      | 2016 | -155.92817             | 19.87172              | small boat | 529                      | NA                 | 367                  | 356.2                                  | 0.79                                | 0.1487                                            | 37.602                                                   | 7.5                                                            |

|    |         |      |            |          |            |      |        |     |       |      |        |         |        |
|----|---------|------|------------|----------|------------|------|--------|-----|-------|------|--------|---------|--------|
| 39 | Inside  | 2016 | -155.84365 | 19.97732 | small boat | 575  | 1-5    | 306 | 233.4 | 0.79 | 0.1511 | 46.988  | 14.03  |
| 40 | Inside  | 2016 | -155.85133 | 19.96963 | small boat | 168  | 1-5    | 328 | 357.3 | 0.79 | 0.1677 | 803.359 | 319.55 |
| 41 | Outside | 2016 | -155.84803 | 19.97300 | small boat | 479  | NA     | 534 | 357.7 | 0.79 | 0.1636 | 82.044  | 68.66  |
| 42 | Outside | 2016 | -155.84107 | 19.98067 | small boat | 724  | NA     | 487 | 328.6 | 0.79 | 0.1503 | 72.83   | 61.25  |
| 43 | Inside  | 2016 | -155.84577 | 19.97418 | small boat | 395  | 1-5    | 406 | 372.2 | 0.79 | 0.1988 | 543.907 | 316.86 |
| 44 | Inside  | 2016 | -155.84009 | 19.99232 | small boat | 1158 | 1-5    | 283 | 174.2 | 0.79 | 0.2195 | 481.377 | 149.35 |
| 45 | Inside  | 2016 | -155.90414 | 19.23420 | small boat | 386  | 10-20  | 534 | 389   | 0.79 | 0.2174 | 118.825 | 58.16  |
| 46 | Inside  | 2016 | -155.89954 | 19.24131 | small boat | 149  | 10-20  | 457 | 358.3 | 0.79 | 0.3126 | 281.876 | 112.15 |
| 47 | Inside  | 2016 | -155.90445 | 19.23918 | small boat | 630  | 20-30  | 418 | 343   | 0.79 | 0.4058 | 14.697  | 10.99  |
| 48 | Inside  | 2016 | -155.91210 | 19.23815 | small boat | 1313 | 20-30  | 567 | 395.9 | 0.79 | 0.323  | 44.777  | 28.86  |
| 49 | Inside  | 2016 | -155.91440 | 19.23987 | small boat | 1601 | 20-30  | 303 | 391.5 | 0.79 | 0.1369 | 104.033 | 30.5   |
| 50 | Inside  | 2016 | -155.90255 | 19.24671 | small boat | 200  | 5-10   | 303 | 247.7 | 0.79 | NA     | 103.342 | 74.28  |
| 51 | Outside | 2016 | -155.90109 | 19.23928 | small boat | 307  | NA     | 476 | 348.6 | 0.79 | NA     | 35.913  | 26.82  |
| 52 | Outside | 2016 | -155.91172 | 19.24066 | small boat | 1326 | NA     | 472 | 397.4 | 0.79 | NA     | 145.657 | 102.79 |
| 54 | Inside  | 2017 | -155.88829 | 20.10930 | small boat | 522  | 1-5m   | 844 | 419.8 | 0.79 | NA     | 86.115  | 66.13  |
| 55 | Outside | 2017 | -155.88886 | 20.11284 | small boat | 386  | NA     | 226 | 262.4 | 0.79 | NA     | 37.911  | 23.14  |
| 56 | Outside | 2017 | -155.87044 | 20.07630 | small boat | 563  | NA     | 396 | 193.7 | 0.79 | NA     | 73.227  | 52.81  |
| 57 | Inside  | 2017 | -155.93754 | 19.86297 | small boat | 1335 | 20-30  | 412 | 294.7 | 0.79 | NA     | 47.669  | 37.12  |
| 59 | Inside  | 2017 | -155.93882 | 19.86855 | small boat | 1582 | 10-20  | 411 | 305.6 | 0.79 | NA     | 41.558  | 28.68  |
| 60 | Inside  | 2017 | -155.93742 | 19.86965 | small boat | 1444 | 1-5m   | 391 | 245.5 | 0.79 | NA     | 567.365 | 481.37 |
| 61 | Inside  | 2017 | -155.94217 | 19.86757 | small boat | 1564 | 1-5m   | 442 | 342.2 | 0.79 | NA     | 304.22  | 200.54 |
| 64 | Outside | 2017 | -155.95536 | 19.86693 | small boat | 1539 | NA     | 460 | 275.9 | 0.79 | NA     | 267.97  | 34.1   |
| 65 | Outside | 2017 | -155.95063 | 19.86846 | small boat | 1651 | NA     | 252 | 233.6 | 0.79 | NA     | 202.675 | 121.66 |
| 66 | Outside | 2017 | -155.93318 | 19.47149 | small boat | 765  | NA     | 383 | 285   | 0.79 | NA     | 30.512  | 7.39   |
| 67 | Inside  | 2017 | -155.92740 | 19.47309 | small boat | 563  | 20-30  | 380 | 289   | 0.79 | NA     | 313.744 | 148.37 |
| 68 | Inside  | 2017 | -155.95339 | 19.47817 | small boat | 823  | 30-100 | 503 | 335   | 0.79 | NA     | 1.941   | NA     |
| 69 | Inside  | 2017 | -155.95760 | 19.49161 | small boat | 816  | 10-20  | 435 | 279.2 | 0.79 | NA     | 28.832  | 8.02   |
| 70 | Outside | 2017 | -155.95503 | 19.48058 | small boat | 784  | NA     | 311 | 258.1 | 0.79 | NA     | 19.574  | 17.33  |
| 71 | Inside  | 2017 | -155.92928 | 19.46823 | small boat | 724  | 1-5m   | 433 | 292.5 | 0.79 | NA     | 425.19  | 276.35 |
| 72 | Inside  | 2017 | -155.94471 | 19.47889 | small boat | 506  | 5-10   | 405 | 278.4 | 0.79 | NA     | 80.891  | 67.53  |
| 73 | Outside | 2017 | -155.94619 | 19.47678 | small boat | 733  | NA     | 410 | 313.7 | 0.79 | NA     | 166.727 | 153.69 |
| 74 | Outside | 2017 | -155.94264 | 19.46782 | small boat | 1341 | NA     | 326 | 208.1 | 0.79 | NA     | 220.505 | 184.6  |
| 75 | Outside | 2017 | -155.89156 | 19.30928 | small boat | 358  | NA     | 381 | 273.7 | 0.79 | NA     | 16.771  | 8.2    |
| 76 | Inside  | 2017 | -155.89251 | 19.30922 | small boat | 450  | 10-20  | 503 | 345.3 | 0.79 | NA     | 32.928  | 14.62  |
| 77 | Inside  | 2017 | -155.90159 | 19.31640 | small boat | 1179 | 20-30  | 422 | 299.6 | 0.79 | NA     | 56.636  | 52.18  |

|     |         |      |            |          |                 |      |        |      |        |      |    |         |        |
|-----|---------|------|------------|----------|-----------------|------|--------|------|--------|------|----|---------|--------|
| 78  | Inside  | 2017 | -155.89313 | 19.32081 | small boat      | 274  | 20-30  | 466  | 331.4  | 0.79 | NA | 20.995  | 16.49  |
| 79  | Outside | 2017 | -155.89830 | 19.32074 | small boat      | 811  | NA     | 355  | 193.7  | 0.79 | NA | 65.081  | 59.72  |
| 80  | Inside  | 2017 | -155.89643 | 19.30395 | small boat      | 760  | 10-20  | 438  | 309.7  | 0.79 | NA | 85.509  | 79.72  |
| 81  | Outside | 2017 | -155.90150 | 19.29692 | small boat      | 1263 | NA     | 389  | 286.5  | 0.79 | NA | 103.822 | 71.18  |
| 84  | Outside | 2017 | -155.91450 | 19.34409 | OscarEltonSette | 2764 | NA     | 1617 | 4004.3 | 2.75 | NA | 0.915   | 0.34   |
| 85  | Inside  | 2017 | -155.91848 | 19.35704 | OscarEltonSette | 2760 | 30-100 | 881  | 2208.9 | 2.75 | NA | 3.041   | 1.19   |
| 86  | Inside  | 2017 | -155.93298 | 19.42230 | OscarEltonSette | 1582 | 30-100 | 655  | 1627.3 | 2.75 | NA | 6.697   | 1.66   |
| 87  | Outside | 2017 | -155.92874 | 19.41446 | OscarEltonSette | 1595 | NA     | 795  | 2154.7 | 2.75 | NA | 1.186   | 0.27   |
| 88  | Inside  | 2017 | -155.91761 | 19.39365 | OscarEltonSette | 771  | 30-100 | 536  | 1356.3 | 2.75 | NA | 2.324   | 0.61   |
| 89  | Inside  | 2017 | -155.91996 | 19.37078 | OscarEltonSette | 2278 | 20-30  | 938  | 2388.6 | 2.75 | NA | 0.717   | 0.15   |
| 90  | Inside  | 2017 | -155.95182 | 19.39330 | OscarEltonSette | 4317 | 30-100 | 1281 | 2644.9 | 2.75 | NA | 1.073   | 0.19   |
| 91  | Outside | 2017 | -155.96990 | 19.40332 | OscarEltonSette | 5991 | NA     | 750  | 1751   | 2.75 | NA | 0.2     | 0.04   |
| 92  | Outside | 2017 | -155.93321 | 19.39266 | OscarEltonSette | 2384 | NA     | 1034 | 2302.7 | 2.75 | NA | 1.595   | 0.29   |
| 93  | Inside  | 2017 | -155.92844 | 19.37987 | OscarEltonSette | 2514 | 30-100 | 390  | 868    | 2.75 | NA | 27.986  | 22.12  |
| 95  | Outside | 2017 | -155.94799 | 19.42202 | OscarEltonSette | 3088 | NA     | 1431 | 3310.4 | 2.75 | NA | 0.952   | 0.11   |
| 96  | Inside  | 2017 | -155.97105 | 19.40149 | OscarEltonSette | 6191 | 30-100 | 1321 | 3192.1 | 2.75 | NA | 2.606   | 0.52   |
| 97  | Inside  | 2017 | -155.97085 | 19.39244 | OscarEltonSette | 6320 | 20-30  | 1336 | 3002.8 | 2.75 | NA | 7.636   | 1.62   |
| 98  | Inside  | 2017 | -155.95659 | 19.37234 | OscarEltonSette | 5496 | 20-30  | 1423 | 2693.7 | 2.75 | NA | 3.642   | 0.17   |
| 99  | Inside  | 2017 | -155.94488 | 19.34571 | OscarEltonSette | 5790 | 10-20  | 1003 | 2626.7 | 2.75 | NA | 1.468   | 0.31   |
| 100 | Outside | 2017 | -155.94134 | 19.35025 | OscarEltonSette | 5231 | NA     | 805  | 1689.2 | 2.75 | NA | 0.295   | 0.1    |
| 107 | Inside  | 2018 | -155.95690 | 19.46228 | small boat      | 2551 | NA     | 751  | 580.7  | 0.79 | NA | 84.553  | 41.839 |
| 118 | Inside  | 2018 | -155.97631 | 19.86506 | small boat      | 1849 | NA     | 248  | 247.2  | 0.79 | NA | 39.062  | 23.79  |
| 119 | Outside | 2018 | -155.97509 | 19.87060 | small boat      | 2369 | NA     | 336  | 267.8  | 0.79 | NA | 2.367   | 1.14   |
| 121 | Outside | 2018 | -155.93761 | 19.88552 | small boat      | 2192 | NA     | 575  | 238.4  | 0.79 | NA | 20.604  | 14.54  |
| 122 | Inside  | 2018 | -155.96662 | 19.85703 | small boat      | 642  | NA     | 311  | 303.6  | 0.79 | NA | 71.64   | 50.25  |
| 125 | Inside  | 2018 | -155.97229 | 19.87356 | small boat      | 2567 | NA     | 447  | 358    | 0.79 | NA | 37.911  | 1.97   |
| 126 | Outside | 2018 | -155.97246 | 19.88024 | small boat      | 3284 | NA     | 475  | 363.6  | 0.79 | NA | 4.497   | 3.74   |
| 135 | Inside  | 2018 | -156.07293 | 19.73595 | small boat      | 1416 | 5-10   | 363  | 203.4  | 0.79 | NA | 92.025  | 29.06  |
| 136 | Outside | 2018 | -156.07465 | 19.73926 | small boat      | 1760 | NA     | 677  | 362.1  | 0.79 | NA | 1.967   | 1.41   |
| 139 | Inside  | 2018 | -155.93068 | 19.88635 | small boat      | 1768 | 20-30  | 800  | 435.9  | 0.79 | NA | 114.341 | 44.32  |
| 140 | Outside | 2018 | -155.92921 | 19.88850 | small boat      | 1786 | NA     | 604  | 496.9  | 0.79 | NA | 8.048   | 2.68   |
| 145 | Inside  | 2018 | -156.07572 | 19.75598 | small boat      | 2396 | 5-10   | 791  | 346.6  | 0.79 | NA | 8.243   | 4.62   |
| 146 | Outside | 2018 | -156.07563 | 19.76883 | small boat      | 2700 | NA     | 868  | 339.5  | 0.79 | NA | 0.978   | NA     |

| Transect | Total Larval Fish Density (individuals m-3) | Pelagic Larval Fish Density (individuals m-3) | Mesopelagic Larval Fish Density (individuals m-3) | Coral Reef Larval Fish Density (individuals m-3) | Unknown Larval Fish Density (individuals m-3) | Plastic Count (pieces) | Plastic Weight (mg) | Plastic Density (pieces m-3) | Microplastic (<= 5 mm) Density (pieces m-3) | Microplastic (<= 1 mm) Density (pieces m-3) |
|----------|---------------------------------------------|-----------------------------------------------|---------------------------------------------------|--------------------------------------------------|-----------------------------------------------|------------------------|---------------------|------------------------------|---------------------------------------------|---------------------------------------------|
| 1        | 0.42994                                     | 0.00000                                       | 0.00000                                           | 0.42994                                          | 0.00000                                       | 9                      | 2                   | 0.14331                      | 0.14331                                     | 0.09554                                     |
| 2        | 0.01633                                     | 0.00000                                       | 0.00000                                           | 0.01633                                          | 0.00000                                       | 10                     | 0.1                 | 0.05444                      | 0.05444                                     | 0.02722                                     |
| 4        | 0.20906                                     | 0.05226                                       | 0.00000                                           | 0.12195                                          | 0.03484                                       | 16                     | 62                  | 0.04646                      | 0.04355                                     | 0.00000                                     |
| 5        | 1.10136                                     | 0.45491                                       | 0.01862                                           | 0.52408                                          | 0.10375                                       | 303                    | 905                 | 0.80607                      | 0.72892                                     | 0.22080                                     |
| 8        | 0.10047                                     | 0.00718                                       | 0.00359                                           | 0.07894                                          | 0.01076                                       | 11                     | 2                   | 0.03947                      | 0.02870                                     | 0.00718                                     |
| 9        | 0.09529                                     | 0.00000                                       | 0.00000                                           | 0.08041                                          | 0.01489                                       | 3                      | 5                   | 0.00893                      | 0.00298                                     | 0.00000                                     |
| 10       | 0.31308                                     | 0.08748                                       | 0.00000                                           | 0.18877                                          | 0.03683                                       | 10                     | 0.1                 | 0.04604                      | 0.04604                                     | 0.00460                                     |
| 13       | 0.02815                                     | 0.00000                                       | 0.00000                                           | 0.02815                                          | 0.00000                                       | 2                      | 0.1                 | 0.00563                      | 0.00000                                     | 0.00000                                     |
| 14       | 0.17339                                     | 0.05117                                       | 0.00284                                           | 0.11086                                          | 0.00853                                       | 11                     | 0.1                 | 0.03127                      | 0.02558                                     | 0.00284                                     |
| 15       | 0.14215                                     | 0.04944                                       | 0.00000                                           | 0.07417                                          | 0.01854                                       | 16                     | 0.1                 | 0.04944                      | 0.04944                                     | 0.03090                                     |
| 16       | 0.80454                                     | 0.24755                                       | 0.02063                                           | 0.45384                                          | 0.08252                                       | 7                      | 2                   | 0.03610                      | 0.03610                                     | 0.00000                                     |
| 17       | 0.21694                                     | 0.01033                                       | 0.00517                                           | 0.19628                                          | 0.00517                                       | 31                     | 24                  | 0.16012                      | 0.12913                                     | 0.01033                                     |
| 18       | 2.02467                                     | 1.19735                                       | 0.00301                                           | 0.82431                                          | 0.00000                                       | 20                     | 30                  | 0.06017                      | 0.04212                                     | 0.00602                                     |
| 19       | 1.08738                                     | 0.07767                                       | 0.00324                                           | 0.94498                                          | 0.06149                                       | 10                     | 4                   | 0.03236                      | 0.02265                                     | 0.00324                                     |
| 20       | 0.29412                                     | 0.00000                                       | 0.00654                                           | 0.26144                                          | 0.02614                                       | 1                      | 0.1                 | 0.00327                      | 0.00000                                     | 0.00000                                     |
| 21       | 0.19699                                     | 0.00334                                       | 0.00000                                           | 0.17362                                          | 0.02003                                       | 35                     | 26                  | 0.11686                      | 0.10351                                     | 0.03339                                     |
| 22       | 0.13778                                     | 0.08339                                       | 0.00000                                           | 0.05076                                          | 0.00363                                       | 3                      | 2                   | 0.01088                      | 0.01088                                     | 0.00000                                     |
| 23       | 0.02833                                     | 0.02518                                       | 0.00000                                           | 0.00315                                          | 0.00000                                       | 0                      | 0                   | 0.00000                      | 0.00000                                     | 0.00000                                     |
| 24       | 0.22049                                     | 0.08268                                       | 0.00000                                           | 0.13780                                          | 0.00000                                       | 5                      | 0.1                 | 0.02297                      | 0.01837                                     | 0.00000                                     |
| 26       | 0.06878                                     | 0.00265                                       | 0.00265                                           | 0.06085                                          | 0.00265                                       | 30                     | 9                   | 0.07937                      | 0.07143                                     | 0.02116                                     |
| 27       | 0.30423                                     | 0.00661                                       | 0.00000                                           | 0.29762                                          | 0.00000                                       | 10                     | 20                  | 0.03307                      | 0.01984                                     | 0.00000                                     |
| 28       | 0.07998                                     | 0.00615                                       | 0.00000                                           | 0.04306                                          | 0.03076                                       | 1                      | 3                   | 0.00308                      | 0.00308                                     | 0.00000                                     |
| 29       | 0.54235                                     | 0.04705                                       | 0.00743                                           | 0.43091                                          | 0.05696                                       | 14                     | 0.1                 | 0.03467                      | 0.03467                                     | 0.00743                                     |
| 30       | 0.60450                                     | 0.01874                                       | 0.01874                                           | 0.52015                                          | 0.04686                                       | 0                      | 0                   | 0.00000                      | 0.00000                                     | 0.00000                                     |
| 31       | 0.78294                                     | 0.13499                                       | 0.00000                                           | 0.57235                                          | 0.07559                                       | 50                     | 20                  | 0.13499                      | 0.11609                                     | 0.04860                                     |
| 32       | 0.22164                                     | 0.13690                                       | 0.00000                                           | 0.08475                                          | 0.00000                                       | 6                      | 49                  | 0.03911                      | 0.01956                                     | 0.00000                                     |
| 33       | 0.43379                                     | 0.09989                                       | 0.00000                                           | 0.33390                                          | 0.00000                                       | 15                     | 109                 | 0.04281                      | 0.02283                                     | 0.00000                                     |
| 34       | 0.28053                                     | 0.05079                                       | 0.00000                                           | 0.22491                                          | 0.00484                                       | 11                     | 0.1                 | 0.02660                      | 0.01935                                     | 0.00242                                     |
| 35       | 0.49797                                     | 0.06606                                       | 0.00000                                           | 0.41413                                          | 0.01778                                       | 6                      | 3                   | 0.01524                      | 0.01016                                     | 0.00000                                     |
| 36       | 9.29555                                     | 6.51012                                       | 0.05668                                           | 2.71255                                          | 0.01619                                       | 371                    | 1141                | 3.00405                      | 2.63158                                     | 0.29960                                     |
| 37       | 3.55081                                     | 2.83090                                       | 0.00750                                           | 0.70491                                          | 0.00750                                       | 305                    | 1129                | 1.14361                      | 1.01237                                     | 0.10874                                     |
| 38       | 0.06176                                     | 0.00000                                       | 0.00561                                           | 0.05615                                          | 0.00000                                       | 26                     | 2                   | 0.07299                      | 0.06176                                     | 0.03088                                     |

|    |         |         |         |         |         |       |        |           |           |          |
|----|---------|---------|---------|---------|---------|-------|--------|-----------|-----------|----------|
| 39 | 0.60411 | 0.56555 | 0.00000 | 0.03428 | 0.00428 | 14    | 5503   | 0.05998   | 0.04284   | 0.00000  |
| 40 | 0.32186 | 0.00560 | 0.00000 | 0.28268 | 0.03359 | 82    | 760    | 0.22950   | 0.20151   | 0.01679  |
| 41 | 0.19010 | 0.00000 | 0.00000 | 0.17613 | 0.01398 | 24    | 13     | 0.06710   | 0.04473   | 0.00280  |
| 42 | 0.09434 | 0.05782 | 0.00000 | 0.02130 | 0.01522 | 8     | 0.1    | 0.02435   | 0.02130   | 0.00913  |
| 43 | 0.47824 | 0.37346 | 0.00000 | 0.09941 | 0.00537 | 31    | 53     | 0.08329   | 0.06717   | 0.00537  |
| 44 | 1.65901 | 0.89552 | 0.00000 | 0.68312 | 0.08037 | 58    | 360    | 0.33295   | 0.28703   | 0.04592  |
| 45 | 0.01285 | 0.00000 | 0.00000 | 0.01285 | 0.00000 | 0     | 0      | 0.00000   | 0.00000   | 0.00000  |
| 46 | 0.02791 | 0.00000 | 0.00000 | 0.02791 | 0.00000 | 4     | 0.1    | 0.01116   | 0.01116   | 0.00558  |
| 47 | 0.00583 | 0.00000 | 0.00000 | 0.00583 | 0.00000 | 0     | 0      | 0.00000   | 0.00000   | 0.00000  |
| 48 | 0.17176 | 0.02526 | 0.00505 | 0.12124 | 0.02021 | 25    | 0.1    | 0.06315   | 0.05557   | 0.03031  |
| 49 | 0.35249 | 0.02554 | 0.00000 | 0.32695 | 0.00000 | 4     | 4      | 0.01022   | 0.00255   | 0.00000  |
| 50 | 0.02826 | 0.02422 | 0.00000 | 0.00404 | 0.00000 | 0     | 0      | 0.00000   | 0.00000   | 0.00000  |
| 51 | 0.00574 | 0.00000 | 0.00000 | 0.00000 | 0.00574 | 4     | 0.1    | 0.01147   | 0.01147   | 0.00000  |
| 52 | 0.07549 | 0.00755 | 0.00252 | 0.05284 | 0.01258 | 2     | 0.1    | 0.00503   | 0.00252   | 0.00000  |
| 54 | 0.09528 | 0.05002 | 0.00000 | 0.04288 | 0.00238 | 190   | 97     | 0.45260   | 0.41210   | 0.12625  |
| 55 | 0.00381 | 0.00000 | 0.00000 | 0.00381 | 0.00000 | 9     | 11     | 0.03430   | 0.02287   | 0.00762  |
| 56 | 0.01033 | 0.00516 | 0.00000 | 0.00000 | 0.00516 | 19    | 19     | 0.09809   | 0.09293   | 0.03098  |
| 57 | 0.68205 | 0.01018 | 0.00679 | 0.63794 | 0.02715 | 101   | 352    | 0.34272   | 0.27146   | 0.05090  |
| 59 | 0.09490 | 0.00654 | 0.00000 | 0.08181 | 0.00654 | 133   | 82     | 0.43521   | 0.36322   | 0.08181  |
| 60 | 1.10794 | 0.35438 | 0.01629 | 0.67210 | 0.06517 | 37868 | 165560 | 154.24847 | 142.44807 | 73.40530 |
| 61 | 0.72472 | 0.19579 | 0.03799 | 0.42081 | 0.07013 | 400   | 358    | 1.16891   | 0.86207   | 0.14611  |
| 64 | 0.02537 | 0.00362 | 0.00725 | 0.01450 | 0.00000 | 0     | 0      | 0.00000   | 0.00000   | 0.00000  |
| 65 | 0.02568 | 0.00428 | 0.00428 | 0.01712 | 0.00000 | 6     | 0.1    | 0.02568   | 0.01712   | 0.00428  |
| 66 | 0.01053 | 0.00000 | 0.00000 | 0.01053 | 0.00000 | 20    | 0.1    | 0.07018   | 0.07018   | 0.04912  |
| 67 | 0.11765 | 0.03806 | 0.00000 | 0.07612 | 0.00346 | 76    | 529    | 0.26298   | 0.18685   | 0.03114  |
| 68 | 0.01194 | 0.00299 | 0.00000 | 0.00597 | 0.00299 | 11    | 2      | 0.03284   | 0.03284   | 0.01194  |
| 69 | 0.03940 | 0.00716 | 0.00000 | 0.03223 | 0.00000 | 97    | 130    | 0.34742   | 0.33309   | 0.06447  |
| 70 | 0.00775 | 0.00387 | 0.00387 | 0.00000 | 0.00000 | 3     | 0.1    | 0.01162   | 0.00775   | 0.00387  |
| 71 | 0.20513 | 0.01026 | 0.00000 | 0.18803 | 0.00684 | 67    | 361    | 0.22906   | 0.19487   | 0.02735  |
| 72 | 0.00000 | 0.00000 | 0.00000 | 0.00000 | 0.00000 | 0     | 0      | 0.00000   | 0.00000   | 0.00000  |
| 73 | 0.00000 | 0.00000 | 0.00000 | 0.00000 | 0.00000 | 0     | 0      | 0.00000   | 0.00000   | 0.00000  |
| 74 | 0.00961 | 0.00000 | 0.00481 | 0.00000 | 0.00481 | 4     | 0.1    | 0.01922   | 0.01922   | 0.00481  |
| 75 | 0.01461 | 0.00365 | 0.00000 | 0.01096 | 0.00000 | 5     | 0.1    | 0.01827   | 0.01461   | 0.00365  |
| 76 | 0.01448 | 0.00000 | 0.00000 | 0.01448 | 0.00000 | 28    | 43     | 0.08109   | 0.06371   | 0.00579  |
| 77 | 0.02003 | 0.02003 | 0.00000 | 0.00000 | 0.00000 | 23    | 35     | 0.07677   | 0.06008   | 0.00668  |

|     |         |         |         |         |         |       |        |          |          |         |
|-----|---------|---------|---------|---------|---------|-------|--------|----------|----------|---------|
| 78  | 0.02414 | 0.00604 | 0.00000 | 0.00604 | 0.01207 | 23    | 65     | 0.06940  | 0.06639  | 0.00604 |
| 79  | 0.01033 | 0.00000 | 0.00000 | 0.00000 | 0.01033 | 0     | 0      | 0.00000  | 0.00000  | 0.00000 |
| 80  | 0.02906 | 0.01292 | 0.00323 | 0.00969 | 0.00323 | 0     | 0      | 0.00000  | 0.00000  | 0.00000 |
| 81  | 0.00349 | 0.00000 | 0.00000 | 0.00000 | 0.00349 | 0     | 0      | 0.00000  | 0.00000  | 0.00000 |
| 84  | 0.02572 | 0.00150 | 0.00100 | 0.02323 | 0.00000 | 26    | 21     | 0.00649  | 0.00549  | 0.00050 |
| 85  | 0.05523 | 0.00905 | 0.00045 | 0.04391 | 0.00181 | 581   | 574    | 0.26303  | 0.22092  | 0.12585 |
| 86  | 0.01475 | 0.00922 | 0.00123 | 0.00369 | 0.00061 | 40    | 49     | 0.02458  | 0.02274  | 0.00430 |
| 87  | 0.00232 | 0.00000 | 0.00093 | 0.00093 | 0.00046 | 15    | 9      | 0.00696  | 0.00418  | 0.00000 |
| 88  | 0.00958 | 0.00074 | 0.00295 | 0.00516 | 0.00074 | 30    | 6      | 0.02212  | 0.02064  | 0.01180 |
| 89  | 0.00670 | 0.00042 | 0.00042 | 0.00544 | 0.00042 | 15    | 17     | 0.00628  | 0.00502  | 0.00293 |
| 90  | 0.02269 | 0.00340 | 0.00000 | 0.01928 | 0.00000 | 2459  | 13480  | 0.92971  | 0.82839  | 0.31079 |
| 91  | 0.00571 | 0.00228 | 0.00114 | 0.00228 | 0.00000 | 43    | 75     | 0.02456  | 0.01942  | 0.00286 |
| 92  | 0.00217 | 0.00000 | 0.00000 | 0.00217 | 0.00000 | 9     | 0.1    | 0.00391  | 0.00304  | 0.00000 |
| 93  | 0.05876 | 0.01613 | 0.00115 | 0.03917 | 0.00230 | 13    | 18     | 0.01498  | 0.01267  | 0.00000 |
| 95  | 0.00816 | 0.00091 | 0.00091 | 0.00483 | 0.00151 | 30    | 110    | 0.00906  | 0.00755  | 0.00121 |
| 96  | 0.01848 | 0.00533 | 0.00407 | 0.00877 | 0.00031 | 98    | 674    | 0.03070  | 0.02600  | 0.00125 |
| 97  | 0.24910 | 0.11090 | 0.01232 | 0.11223 | 0.01365 | 14836 | 59057  | 4.94072  | 4.42920  | 1.64946 |
| 98  | 0.14144 | 0.05123 | 0.00780 | 0.08056 | 0.00186 | 21048 | 143658 | 7.81379  | 7.15187  | 3.48851 |
| 99  | 0.05482 | 0.02627 | 0.00495 | 0.02132 | 0.00228 | 1740  | 1920   | 0.66243  | 0.61750  | 0.18045 |
| 100 | 0.00296 | 0.00000 | 0.00000 | 0.00296 | 0.00000 | 20    | 10     | 0.01184  | NA       | NA      |
| 107 | 0.31169 | 0.18770 | 0.00172 | 0.10849 | 0.01378 | 5354  | 5469   | 9.21991  | 7.26709  | 3.11693 |
| 118 | 2.53236 | 2.13188 | 0.00809 | 0.33576 | 0.05663 | 6915  | 261228 | 27.97330 | 20.22654 | 8.97249 |
| 119 | 0.10082 | 0.07468 | 0.00373 | 0.01867 | 0.00373 | 6     | 11     | 0.02240  | 0.01494  | 0.00747 |
| 121 | 0.01678 | 0.01258 | 0.00000 | 0.00000 | 0.00419 | 26    | 25     | 0.10906  | 0.08809  | 0.03775 |
| 122 | 0.72793 | 0.42161 | 0.02635 | 0.24374 | 0.03623 | 2846  | 9319   | 9.37418  | 7.77668  | 2.34190 |
| 125 | 0.39385 | 0.22905 | 0.00559 | 0.15642 | 0.00279 | 4209  | 10112  | 11.75698 | 10.76536 | 6.40223 |
| 126 | 0.01650 | 0.00550 | 0.00000 | 0.00550 | 0.00550 | 29    | 11     | 0.07976  | 0.06876  | 0.03300 |
| 135 | 3.99213 | 2.96460 | 0.00492 | 0.97837 | 0.04425 | 3182  | 14122  | 15.64405 | 13.90364 | 5.39823 |
| 136 | 0.01381 | 0.01105 | 0.00276 | 0.00000 | 0.00000 | 59    | 37     | 0.16294  | 0.15465  | 0.10494 |
| 139 | 0.80064 | 0.60335 | 0.00459 | 0.15370 | 0.03900 | 3147  | 24861  | 7.21955  | 6.02432  | 2.72081 |
| 140 | 0.11672 | 0.03019 | 0.00000 | 0.08251 | 0.00402 | 13    | 22     | 0.02616  | 0.01006  | 0.00402 |
| 145 | 0.12118 | 0.03751 | 0.00000 | 0.04905 | 0.03462 | 640   | 15472  | 1.84651  | 1.69359  | 1.06463 |
| 146 | 0.02062 | 0.00589 | 0.00000 | 0.00000 | 0.01473 | 20    | 0.1    | 0.05891  | NA       | NA      |

**Table S2.** Plastic polymer identification of the randomized subset of plastic pieces from surface slicks.

| Sample | Size                 | Shape    | Color | Mass (mg) | Polymer             |
|--------|----------------------|----------|-------|-----------|---------------------|
| 1      | macroplastic (>25mm) | line     | white | 2.53      | Unkown Polyethylene |
| 2      | microplastic (<5mm)  | fragment | blue  | 19.9      | Unkown Polyethylene |
| 3      | microplastic (<5mm)  | fragment | white | 0.66      | Unkown Polyethylene |
| 4      | microplastic (<5mm)  | fragment | white | 11.26     | Unkown Polyethylene |
| 5      | microplastic (<5mm)  | fragment | blue  | 0.28      | Unkown Polyethylene |
| 6      | microplastic (<5mm)  | fragment | white | 0.21      | Unkown Polyethylene |
| 7      | microplastic (<5mm)  | fragment | white | 1.2       | Unkown Polyethylene |
| 8      | microplastic (<5mm)  | fragment | white | 0.91      | Unkown Polyethylene |
| 9      | microplastic (<5mm)  | fragment | white | 0.25      | Unkown Polyethylene |
| 10     | mesoplastic (5-25mm) | line     | blue  | 1.69      | Unkown Polyethylene |
| 11     | microplastic (<5mm)  | fragment | beige | 0.3       | Unkown Polyethylene |
| 12     | microplastic (<5mm)  | fragment | white | <0.01     | Unkown Polyethylene |
| 13     | microplastic (<5mm)  | line     | green | 0.08      | Unkown Polyethylene |
| 14     | microplastic (<5mm)  | fragment | white | 5.41      | Unkown Polyethylene |
| 15     | microplastic (<5mm)  | fragment | white | 4         | Unkown Polyethylene |
| 16     | microplastic (<5mm)  | fragment | white | 7.92      | Unkown Polyethylene |
| 17     | microplastic (<5mm)  | fragment | white | 3.63      | Unkown Polyethylene |
| 18     | microplastic (<5mm)  | fragment | white | 0.93      | Unkown Polyethylene |
| 19     | microplastic (<5mm)  | fragment | white | 1.43      | Unkown Polyethylene |
| 20     | microplastic (<5mm)  | fragment | white | 2.11      | Unkown Polyethylene |
| 21     | microplastic (<5mm)  | fragment | white | 1.05      | Unkown Polyethylene |
| 22     | microplastic (<5mm)  | fragment | white | 1.41      | Unkown Polyethylene |
| 23     | microplastic (<5mm)  | fragment | beige | 6.06      | Unkown Polyethylene |
| 24     | microplastic (<5mm)  | fragment | beige | 2.51      | Unkown Polyethylene |
| 25     | microplastic (<5mm)  | fragment | white | 7.71      | Unkown Polyethylene |
| 26     | microplastic (<5mm)  | fragment | white | 0.44      | Unkown Polyethylene |
| 27     | microplastic (<5mm)  | fragment | white | 1.95      | Unkown Polyethylene |
| 28     | microplastic (<5mm)  | fragment | white | 0.15      | Unkown Polyethylene |
| 29     | microplastic (<5mm)  | fragment | blue  | 0.01      | Unkown Polyethylene |
| 30     | microplastic (<5mm)  | fragment | white | 0.2       | Unkown Polyethylene |
| 31     | microplastic (<5mm)  | fragment | white | 0.18      | Unkown Polyethylene |
| 32     | microplastic (<5mm)  | fragment | white | 0.21      | Unkown Polyethylene |
| 33     | microplastic (<5mm)  | line     | blue  | 0.06      | Unkown Polyethylene |
| 34     | microplastic (<5mm)  | fragment | white | 0.02      | Unkown Polyethylene |
| 35     | microplastic (<5mm)  | fragment | white | 0.17      | Unkown Polyethylene |
| 36     | microplastic (<5mm)  | fragment | white | <0.01     | Unkown Polyethylene |
| 37     | mesoplastic (5-25mm) | fragment | beige | 41.44     | Unkown Polyethylene |
| 38     | mesoplastic (5-25mm) | fragment | blue  | 102.36    | Unkown Polyethylene |
| 39     | mesoplastic (5-25mm) | line     | white | 0.81      | Unkown Polyethylene |
| 40     | microplastic (<5mm)  | fragment | blue  | 0.96      | Unkown Polyethylene |
| 41     | mesoplastic (5-25mm) | line     | white | 1.32      | Unkown Polyethylene |
| 42     | mesoplastic (5-25mm) | line     | gray  | 0.45      | Unkown Polyethylene |
| 43     | microplastic (<5mm)  | line     | gray  | 0.26      | Unkown Polyethylene |
| 44     | microplastic (<5mm)  | line     | blue  | 0.53      | Unkown Polyethylene |
| 45     | microplastic (<5mm)  | line     | gray  | 0.08      | Unkown Polyethylene |
| 46     | microplastic (<5mm)  | line     | blue  | 0.31      | Unkown Polyethylene |
| 47     | mesoplastic (5-25mm) | line     | grey  | 0.27      | Unkown Polyethylene |
| 48     | microplastic (<5mm)  | fragment | blue  | 0.23      | Unkown Polyethylene |
| 49     | microplastic (<5mm)  | fragment | blue  | 0.2       | Unkown Polyethylene |
| 50     | microplastic (<5mm)  | fragment | blue  | 0.21      | Unkown Polyethylene |
| 51     | microplastic (<5mm)  | fragment | blue  | 0.15      | Unkown Polyethylene |
| 52     | microplastic (<5mm)  | fragment | beige | 0.23      | Unkown Polyethylene |
| 53     | microplastic (<5mm)  | fragment | white | 0.45      | Unkown Polyethylene |
| 54     | microplastic (<5mm)  | fragment | white | 0.26      | Unkown Polyethylene |
| 55     | microplastic (<5mm)  | line     | white | 0.26      | Unkown Polyethylene |
| 56     | microplastic (<5mm)  | fragment | white | 0.48      | Unkown Polyethylene |
| 57     | microplastic (<5mm)  | fragment | white | 0.16      | Unkown Polyethylene |
| 58     | microplastic (<5mm)  | fragment | beige | 0.59      | Unkown Polyethylene |
| 59     | microplastic (<5mm)  | fragment | green | <0.01     | Unkown Polyethylene |
| 60     | microplastic (<5mm)  | fragment | blue  | 0.18      | Unkown Polyethylene |
| 61     | microplastic (<5mm)  | fragment | white | 0.18      | Unkown Polyethylene |
| 62     | microplastic (<5mm)  | line     | blue  | 0.2       | Unkown Polyethylene |
| 63     | microplastic (<5mm)  | line     | gray  | 0.13      | Unkown Polyethylene |
| 64     | microplastic (<5mm)  | fragment | blue  | <0.01     | Unkown Polyethylene |



|     |                      |          |           |         |                     |
|-----|----------------------|----------|-----------|---------|---------------------|
| 65  | microplastic (<5mm)  | fragment | white     | 0.38    | Unkown Polyethylene |
| 66  | microplastic (<5mm)  | fragment | white     | 1.04    | Unkown Polyethylene |
| 67  | microplastic (<5mm)  | fragment | white     | 6.46    | Unkown Polyethylene |
| 68  | mesoplastic (5-25mm) | line     | silver    | 0.78    | Unkown Polyethylene |
| 69  | macroplastic (>25mm) | whole    | gray      | 5522.85 | Unkown Polyethylene |
| 70  | macroplastic (>25mm) | sheet    | colorless | 318.27  | Unkown Polyethylene |
| 71  | macroplastic (>25mm) | line     | white     | 468.2   | Unkown Polyethylene |
| 72  | mesoplastic (5-25mm) | fragment | white     | 16.41   | Unkown Polyethylene |
| 73  | mesoplastic (5-25mm) | fragment | green     | 7.33    | Unkown Polyethylene |
| 74  | mesoplastic (5-25mm) | fragment | white     | 3.85    | Unkown Polyethylene |
| 75  | microplastic (<5mm)  | nurdle   | black     | 30.47   | Unkown Polyethylene |
| 76  | microplastic (<5mm)  | fragment | blue      | 9.17    | Unkown Polyethylene |
| 77  | microplastic (<5mm)  | fragment | blue      | 20.97   | Unkown Polyethylene |
| 78  | microplastic (<5mm)  | fragment | white     | 27.27   | Unkown Polyethylene |
| 79  | microplastic (<5mm)  | fragment | blue      | 8.3     | Unkown Polyethylene |
| 80  | microplastic (<5mm)  | fragment | white     | 11.31   | Unkown Polyethylene |
| 81  | microplastic (<5mm)  | fragment | white     | 11.79   | Unkown Polyethylene |
| 82  | microplastic (<5mm)  | fragment | green     | 15.15   | Unkown Polyethylene |
| 83  | microplastic (<5mm)  | nurdle   | white     | 32.72   | Unkown Polyethylene |
| 84  | mesoplastic (5-25mm) | fragment | white     | 75.21   | Unkown Polyethylene |
| 85  | microplastic (<5mm)  | fragment | white     | 23.2    | Unkown Polyethylene |
| 86  | mesoplastic (5-25mm) | fragment | white     | 88.01   | Unkown Polyethylene |
| 87  | macroplastic (>25mm) | line     | gray      | 3.07    | Unkown Polyethylene |
| 88  | macroplastic (>25mm) | line     | yellow    | 5.98    | Unkown Polyethylene |
| 89  | microplastic (<5mm)  | fragment | white     | 8.38    | Unkown Polyethylene |
| 90  | microplastic (<5mm)  | fragment | white     | 14.04   | Unkown Polyethylene |
| 91  | mesoplastic (5-25mm) | fragment | white     | 49.4    | Unkown Polyethylene |
| 92  | microplastic (<5mm)  | fragment | white     | 16.28   | Unkown Polyethylene |
| 93  | microplastic (<5mm)  | fragment | blue      | 38.25   | Unkown Polyethylene |
| 94  | mesoplastic (5-25mm) | fragment | black     | 5.31    | Unkown Polyethylene |
| 95  | mesoplastic (5-25mm) | fragment | white     | 18.92   | Unkown Polyethylene |
| 96  | microplastic (<5mm)  | fragment | white     | 15.77   | Unkown Polyethylene |
| 97  | microplastic (<5mm)  | fragment | white     | 12.2    | Unkown Polyethylene |
| 98  | microplastic (<5mm)  | fragment | white     | 7.27    | Unkown Polyethylene |
| 99  | mesoplastic (5-25mm) | fragment | white     | 23.86   | Unkown Polyethylene |
| 100 | mesoplastic (5-25mm) | fragment | blue      | 24.32   | Unkown Polyethylene |
| 101 | mesoplastic (5-25mm) | line     | blue      | 3.02    | Unkown Polyethylene |
| 102 | mesoplastic (5-25mm) | fragment | blue      | 23.97   | Unkown Polyethylene |
| 103 | microplastic (<5mm)  | fragment | white     | 8.21    | Unkown Polyethylene |
| 104 | mesoplastic (5-25mm) | fragment | black     | 13.52   | Unkown Polyethylene |
| 105 | microplastic (<5mm)  | fragment | white     | 17.75   | Unkown Polyethylene |
| 106 | microplastic (<5mm)  | fragment | green     | 3.14    | Unkown Polyethylene |
| 107 | microplastic (<5mm)  | fragment | blue      | 4.63    | Unkown Polyethylene |
| 108 | microplastic (<5mm)  | fragment | blue      | 3.86    | Unkown Polyethylene |
| 109 | microplastic (<5mm)  | fragment | yellow    | 5.4     | Unkown Polyethylene |
| 110 | microplastic (<5mm)  | fragment | white     | 8.32    | Unkown Polyethylene |
| 111 | microplastic (<5mm)  | fragment | blue      | 18      | Unkown Polyethylene |
| 112 | microplastic (<5mm)  | fragment | green     | 11.24   | Unkown Polyethylene |
| 113 | microplastic (<5mm)  | fragment | beige     | 11.66   | Unkown Polyethylene |
| 114 | microplastic (<5mm)  | fragment | gray      | 7.89    | Unkown Polyethylene |
| 115 | microplastic (<5mm)  | fragment | white     | 4.61    | Unkown Polyethylene |
| 116 | microplastic (<5mm)  | fragment | white     | 4.06    | Unkown Polyethylene |
| 117 | microplastic (<5mm)  | fragment | white     | 16.16   | Unkown Polyethylene |
| 118 | mesoplastic (5-25mm) | fragment | white     | 9.85    | Unkown Polyethylene |
| 119 | microplastic (<5mm)  | fragment | white     | 14.69   | Unkown Polyethylene |
| 120 | microplastic (<5mm)  | fragment | green     | 3.8     | Unkown Polyethylene |
| 121 | mesoplastic (5-25mm) | fragment | white     | 6.35    | Unkown Polyethylene |
| 122 | microplastic (<5mm)  | fragment | white     | 9.44    | Unkown Polyethylene |
| 123 | microplastic (<5mm)  | fragment | beige     | 10.12   | Unkown Polyethylene |
| 124 | microplastic (<5mm)  | fragment | white     | 8.98    | Unkown Polyethylene |
| 125 | mesoplastic (5-25mm) | line     | black     | 2.47    | Unkown Polyethylene |
| 126 | microplastic (<5mm)  | fragment | green     | 3.91    | Unkown Polyethylene |
| 127 | microplastic (<5mm)  | fragment | white     | 5.98    | Unkown Polyethylene |
| 128 | microplastic (<5mm)  | fragment | white     | 7.91    | Unkown Polyethylene |
| 129 | microplastic (<5mm)  | fragment | green     | 0.64    | Unkown Polyethylene |

|     |                      |            |        |        |                            |
|-----|----------------------|------------|--------|--------|----------------------------|
| 130 | microplastic (<5mm)  | fragment   | beige  | 2.3    | Unkown Polyethylene        |
| 131 | microplastic (<5mm)  | fragment   | beige  | 1.32   | Unkown Polyethylene        |
| 132 | microplastic (<5mm)  | fragment   | gray   | 1.55   | Unkown Polyethylene        |
| 133 | microplastic (<5mm)  | fragment   | beige  | 0.41   | Unkown Polyethylene        |
| 134 | microplastic (<5mm)  | fragment   | white  | 8.54   | Unkown Polyethylene        |
| 135 | microplastic (<5mm)  | fragment   | white  | 8.06   | Unkown Polyethylene        |
| 136 | microplastic (<5mm)  | fragment   | white  | 3.33   | Unkown Polyethylene        |
| 137 | microplastic (<5mm)  | fragment   | white  | 1.31   | Unkown Polyethylene        |
| 138 | microplastic (<5mm)  | fragment   | white  | 4.54   | Unkown Polyethylene        |
| 139 | microplastic (<5mm)  | fragment   | white  | 5.36   | Unkown Polyethylene        |
| 140 | mesoplastic (5-25mm) | line       | gray   | 0.58   | Unkown Polyethylene        |
| 141 | mesoplastic (5-25mm) | line       | blue   | 0.46   | Unkown Polyethylene        |
| 142 | microplastic (<5mm)  | fragment   | white  | 5.72   | Unkown Polyethylene        |
| 143 | microplastic (<5mm)  | fragment   | white  | 6.6    | Unkown Polyethylene        |
| 144 | microplastic (<5mm)  | fragment   | green  | 2.4    | Unkown Polyethylene        |
| 145 | microplastic (<5mm)  | fragment   | blue   | 3.35   | Unkown Polyethylene        |
| 146 | microplastic (<5mm)  | fragment   | white  | 3.75   | Unkown Polyethylene        |
| 147 | microplastic (<5mm)  | fragment   | white  | 2.46   | Unkown Polyethylene        |
| 148 | microplastic (<5mm)  | fragment   | white  | 2.52   | Unkown Polyethylene        |
| 149 | microplastic (<5mm)  | fragment   | white  | 4.82   | Unkown Polyethylene        |
| 150 | microplastic (<5mm)  | fragment   | white  | 4.16   | Unkown Polyethylene        |
| 151 | microplastic (<5mm)  | fragment   | white  | 1.11   | Unkown Polyethylene        |
| 152 | microplastic (<5mm)  | fragment   | white  | <0.01  | Unkown Polyethylene        |
| 153 | microplastic (<5mm)  | fragment   | white  | <0.01  | Unkown Polyethylene        |
| 154 | microplastic (<5mm)  | fragment   | brown  | 0.94   | Unknown                    |
| 155 | microplastic (<5mm)  | fragment   | beige  | 0.06   | Unknown                    |
| 156 | microplastic (<5mm)  | fragment   | black  | <0.01  | Unknown                    |
| 157 | microplastic (<5mm)  | paint chip | red    | <0.01  | Unknown                    |
| 158 | microplastic (<5mm)  | paint chip | red    | <0.01  | Unknown                    |
| 159 | microplastic (<5mm)  | paint chip | red    | <0.01  | Unknown                    |
| 160 | microplastic (<5mm)  | fragment   | blue   | 3.56   | Unknown                    |
| 161 | microplastic (<5mm)  | fragment   | beige  | <0.01  | Unknown                    |
| 162 | microplastic (<5mm)  | fragment   | white  | <0.01  | Unknown                    |
| 163 | microplastic (<5mm)  | fragment   | beige  | 0.71   | Unknown                    |
| 164 | microplastic (<5mm)  | fragment   | white  | 0.98   | Unknown                    |
| 165 | microplastic (<5mm)  | fragment   | beige  | 0.36   | Unknown                    |
| 166 | microplastic (<5mm)  | fragment   | white  | 0.89   | Unknown                    |
| 167 | microplastic (<5mm)  | fragment   | blue   | 1.05   | Unknown                    |
| 168 | microplastic (<5mm)  | fragment   | black  | 31.92  | Polystyrene                |
| 169 | microplastic (<5mm)  | fragment   | blue   | 0.91   | Polypropylene/Polyethylene |
| 170 | microplastic (<5mm)  | fragment   | blue   | <0.01  | Polypropylene/Polyethylene |
| 171 | microplastic (<5mm)  | fragment   | blue   | 10.14  | Polypropylene/Polyethylene |
| 172 | macroplastic (>25mm) | line       | black  | 2.44   | Polypropylene/Polyethylene |
| 173 | microplastic (<5mm)  | fragment   | beige  | 0.12   | Polypropylene/Polyethylene |
| 174 | macroplastic (>25mm) | line       | white  | 8.61   | Polypropylene/Polyethylene |
| 175 | macroplastic (>25mm) | line       | white  | 4.93   | Polypropylene/Polyethylene |
| 176 | mesoplastic (5-25mm) | line       | white  | 1.76   | Polypropylene/Polyethylene |
| 177 | mesoplastic (5-25mm) | line       | silver | 0.41   | Polypropylene/Polyethylene |
| 178 | mesoplastic (5-25mm) | line       | white  | 1.71   | Polypropylene/Polyethylene |
| 179 | mesoplastic (5-25mm) | line       | white  | 0.53   | Polypropylene/Polyethylene |
| 180 | microplastic (<5mm)  | line       | white  | 0.08   | Polypropylene/Polyethylene |
| 181 | microplastic (<5mm)  | line       | blue   | 0.03   | Polypropylene/Polyethylene |
| 182 | mesoplastic (5-25mm) | line       | beige  | 0.18   | Polypropylene/Polyethylene |
| 183 | microplastic (<5mm)  | fragment   | beige  | 0.25   | Polypropylene/Polyethylene |
| 184 | mesoplastic (5-25mm) | line       | gray   | 1.43   | Polypropylene/Polyethylene |
| 185 | macroplastic (>25mm) | line       | white  | 324.63 | Polypropylene/Polyethylene |
| 186 | mesoplastic (5-25mm) | line       | white  | 6.11   | Polypropylene/Polyethylene |
| 187 | macroplastic (>25mm) | line       | white  | 46.02  | Polypropylene/Polyethylene |
| 188 | macroplastic (>25mm) | line       | white  | 27.66  | Polypropylene/Polyethylene |
| 189 | macroplastic (>25mm) | line       | white  | 9.31   | Polypropylene/Polyethylene |
| 190 | macroplastic (>25mm) | line       | green  | 7.87   | Polypropylene/Polyethylene |
| 191 | macroplastic (>25mm) | line       | green  | 24.26  | Polypropylene/Polyethylene |
| 192 | macroplastic (>25mm) | line       | white  | 10.08  | Polypropylene/Polyethylene |
| 193 | macroplastic (>25mm) | line       | white  | 143.98 | Polypropylene/Polyethylene |
| 194 | macroplastic (>25mm) | line       | silver | 15.44  | Polypropylene/Polyethylene |

|     |                      |          |        |       |                            |
|-----|----------------------|----------|--------|-------|----------------------------|
| 195 | macroplastic (>25mm) | line     | white  | 1.56  | Polypropylene/Polyethylene |
| 196 | macroplastic (>25mm) | line     | white  | 22.51 | Polypropylene/Polyethylene |
| 197 | macroplastic (>25mm) | line     | white  | 3.47  | Polypropylene/Polyethylene |
| 198 | mesoplastic (5-25mm) | line     | white  | 3.9   | Polypropylene/Polyethylene |
| 199 | mesoplastic (5-25mm) | line     | white  | 2.44  | Polypropylene/Polyethylene |
| 200 | mesoplastic (5-25mm) | fragment | gray   | 5.11  | Polypropylene/Polyethylene |
| 201 | mesoplastic (5-25mm) | fragment | black  | 8.73  | Polypropylene/Polyethylene |
| 202 | macroplastic (>25mm) | line     | white  | 2.7   | Polypropylene/Polyethylene |
| 203 | mesoplastic (5-25mm) | line     | black  | 2.4   | Polypropylene/Polyethylene |
| 204 | mesoplastic (5-25mm) | line     | white  | 0.95  | Polypropylene/Polyethylene |
| 205 | mesoplastic (5-25mm) | fragment | pink   | 3.01  | Polypropylene/Polyethylene |
| 206 | mesoplastic (5-25mm) | line     | white  | 0.53  | Polypropylene/Polyethylene |
| 207 | mesoplastic (5-25mm) | line     | white  | 0.32  | Polypropylene/Polyethylene |
| 208 | mesoplastic (5-25mm) | fragment | gray   | 76.8  | Polypropylene/Polyethylene |
| 209 | mesoplastic (5-25mm) | line     | white  | 3.55  | Polypropylene/Polyethylene |
| 210 | macroplastic (>25mm) | line     | white  | 8.66  | Polypropylene/Polyethylene |
| 211 | macroplastic (>25mm) | line     | green  | 3.86  | Polypropylene/Polyethylene |
| 212 | mesoplastic (5-25mm) | line     | green  | 13.96 | Polypropylene/Polyethylene |
| 213 | mesoplastic (5-25mm) | fragment | green  | 46.48 | Polypropylene/Polyethylene |
| 214 | macroplastic (>25mm) | line     | white  | 6.7   | Polypropylene/Polyethylene |
| 215 | mesoplastic (5-25mm) | line     | blue   | 2.8   | Polypropylene/Polyethylene |
| 216 | macroplastic (>25mm) | line     | white  | 1.2   | Polypropylene/Polyethylene |
| 217 | mesoplastic (5-25mm) | line     | white  | 4.34  | Polypropylene/Polyethylene |
| 218 | macroplastic (>25mm) | line     | white  | 5.07  | Polypropylene/Polyethylene |
| 219 | mesoplastic (5-25mm) | fragment | white  | 22    | Polypropylene/Polyethylene |
| 220 | mesoplastic (5-25mm) | line     | white  | 4.65  | Polypropylene/Polyethylene |
| 221 | mesoplastic (5-25mm) | line     | green  | 1.45  | Polypropylene/Polyethylene |
| 222 | mesoplastic (5-25mm) | line     | white  | 2.96  | Polypropylene/Polyethylene |
| 223 | mesoplastic (5-25mm) | line     | white  | 2.39  | Polypropylene/Polyethylene |
| 224 | microplastic (<5mm)  | nurdle   | black  | 21.4  | Polypropylene/Polyethylene |
| 225 | microplastic (<5mm)  | fragment | blue   | 4.78  | Polypropylene/Polyethylene |
| 226 | mesoplastic (5-25mm) | line     | white  | 1.24  | Polypropylene/Polyethylene |
| 227 | microplastic (<5mm)  | nurdle   | black  | 15.24 | Polypropylene/Polyethylene |
| 228 | mesoplastic (5-25mm) | fragment | black  | 2.49  | Polypropylene/Polyethylene |
| 229 | mesoplastic (5-25mm) | line     | green  | 0.85  | Polypropylene/Polyethylene |
| 230 | mesoplastic (5-25mm) | line     | white  | 1.56  | Polypropylene/Polyethylene |
| 231 | mesoplastic (5-25mm) | line     | white  | 1.64  | Polypropylene/Polyethylene |
| 232 | mesoplastic (5-25mm) | line     | white  | 3.29  | Polypropylene/Polyethylene |
| 233 | microplastic (<5mm)  | line     | green  | 0.75  | Polypropylene/Polyethylene |
| 234 | mesoplastic (5-25mm) | line     | white  | 3.58  | Polypropylene/Polyethylene |
| 235 | microplastic (<5mm)  | line     | green  | 0.15  | Polypropylene/Polyethylene |
| 236 | mesoplastic (5-25mm) | fragment | white  | 90.03 | Polypropylene              |
| 237 | microplastic (<5mm)  | fragment | white  | 1.66  | Polypropylene              |
| 238 | microplastic (<5mm)  | fragment | white  | 0.34  | Polypropylene              |
| 239 | microplastic (<5mm)  | fragment | white  | 0.01  | Polypropylene              |
| 240 | microplastic (<5mm)  | fragment | beige  | 0.4   | Polypropylene              |
| 241 | microplastic (<5mm)  | fragment | beige  | 0.54  | Polypropylene              |
| 242 | microplastic (<5mm)  | fragment | white  | 0.74  | Polypropylene              |
| 243 | microplastic (<5mm)  | fragment | white  | 13.43 | Polypropylene              |
| 244 | microplastic (<5mm)  | fragment | beige  | 4.6   | Polypropylene              |
| 245 | microplastic (<5mm)  | fragment | white  | 3.11  | Polypropylene              |
| 246 | microplastic (<5mm)  | fragment | white  | 0.93  | Polypropylene              |
| 247 | microplastic (<5mm)  | fragment | white  | 0.29  | Polypropylene              |
| 248 | microplastic (<5mm)  | fragment | white  | 1.46  | Polypropylene              |
| 249 | microplastic (<5mm)  | fragment | beige  | 2.71  | Polypropylene              |
| 250 | microplastic (<5mm)  | fragment | beige  | 0.37  | Polypropylene              |
| 251 | microplastic (<5mm)  | fragment | beige  | 0.44  | Polypropylene              |
| 252 | microplastic (<5mm)  | fragment | green  | <0.01 | Polypropylene              |
| 253 | mesoplastic (5-25mm) | line     | yellow | 0.96  | Polypropylene              |
| 254 | microplastic (<5mm)  | line     | green  | <0.01 | Polypropylene              |
| 255 | microplastic (<5mm)  | sheet    | blue   | 0.2   | Polypropylene              |
| 256 | microplastic (<5mm)  | sheet    | blue   | 0.19  | Polypropylene              |
| 257 | microplastic (<5mm)  | fragment | beige  | 0.3   | Polypropylene              |
| 258 | microplastic (<5mm)  | fragment | beige  | 0.57  | Polypropylene              |
| 259 | microplastic (<5mm)  | fragment | green  | 0.27  | Polypropylene              |

|     |                      |          |        |        |                          |
|-----|----------------------|----------|--------|--------|--------------------------|
| 260 | microplastic (<5mm)  | fragment | beige  | 0.17   | Polypropylene            |
| 261 | microplastic (<5mm)  | fragment | white  | 0.31   | Polypropylene            |
| 262 | mesoplastic (5-25mm) | fragment | white  | 122.79 | Polypropylene            |
| 263 | macroplastic (>25mm) | line     | gray   | 10.12  | Polypropylene            |
| 264 | mesoplastic (5-25mm) | fragment | white  | 76.87  | Polypropylene            |
| 265 | mesoplastic (5-25mm) | fragment | white  | 52.75  | Polypropylene            |
| 266 | macroplastic (>25mm) | line     | white  | 6.5    | Polypropylene            |
| 267 | mesoplastic (5-25mm) | fragment | white  | 18.92  | Polypropylene            |
| 268 | macroplastic (>25mm) | line     | yellow | 2.02   | Polypropylene            |
| 269 | mesoplastic (5-25mm) | line     | white  | 0.33   | Polypropylene            |
| 270 | microplastic (<5mm)  | nurdle   | white  | 15.96  | Polypropylene            |
| 271 | microplastic (<5mm)  | fragment | beige  | 1.07   | Polypropylene            |
| 272 | mesoplastic (5-25mm) | fragment | white  | 27.81  | Polypropylene            |
| 273 | mesoplastic (5-25mm) | fragment | blue   | 36.33  | Polypropylene            |
| 274 | mesoplastic (5-25mm) | fragment | white  | 16.09  | Polypropylene            |
| 275 | microplastic (<5mm)  | fragment | beige  | 31.12  | Polypropylene            |
| 276 | microplastic (<5mm)  | nurdle   | white  | 20.68  | Polypropylene            |
| 277 | mesoplastic (5-25mm) | line     | white  | 3.72   | Polypropylene            |
| 278 | mesoplastic (5-25mm) | fragment | blue   | 14.55  | Polypropylene            |
| 279 | microplastic (<5mm)  | fragment | white  | 13.65  | Polypropylene            |
| 280 | microplastic (<5mm)  | fragment | white  | 15.33  | Polypropylene            |
| 281 | mesoplastic (5-25mm) | fragment | white  | 32.83  | Polypropylene            |
| 282 | microplastic (<5mm)  | fragment | white  | 8.28   | Polypropylene            |
| 283 | microplastic (<5mm)  | fragment | gray   | 4.06   | Polypropylene            |
| 284 | mesoplastic (5-25mm) | line     | green  | 4.72   | Polypropylene            |
| 285 | microplastic (<5mm)  | fragment | white  | 8.42   | Polypropylene            |
| 286 | mesoplastic (5-25mm) | fragment | white  | 11.61  | Polypropylene            |
| 287 | mesoplastic (5-25mm) | line     | white  | 2.35   | Polypropylene            |
| 288 | microplastic (<5mm)  | fragment | white  | 23.46  | Polypropylene            |
| 289 | mesoplastic (5-25mm) | fragment | beige  | 27.1   | Polypropylene            |
| 290 | microplastic (<5mm)  | fragment | white  | 21.09  | Polypropylene            |
| 291 | mesoplastic (5-25mm) | fragment | beige  | 10.75  | Polypropylene            |
| 292 | microplastic (<5mm)  | fragment | beige  | 5.21   | Polypropylene            |
| 293 | microplastic (<5mm)  | fragment | green  | 10.31  | Polypropylene            |
| 294 | microplastic (<5mm)  | fragment | green  | 4.61   | Polypropylene            |
| 295 | microplastic (<5mm)  | fragment | brown  | 4.82   | Polypropylene            |
| 296 | microplastic (<5mm)  | fragment | beige  | 8.41   | Polypropylene            |
| 297 | microplastic (<5mm)  | fragment | white  | 2.6    | Polypropylene            |
| 298 | microplastic (<5mm)  | fragment | green  | 5.12   | Polypropylene            |
| 299 | mesoplastic (5-25mm) | line     | orange | 0.97   | Polypropylene            |
| 300 | microplastic (<5mm)  | fragment | green  | 6.62   | Polypropylene            |
| 301 | mesoplastic (5-25mm) | line     | blue   | 0.55   | Polypropylene            |
| 302 | microplastic (<5mm)  | fragment | beige  | 7.06   | Polypropylene            |
| 303 | microplastic (<5mm)  | fragment | brown  | 1.39   | Polypropylene            |
| 304 | microplastic (<5mm)  | fragment | white  | 1.1    | Polypropylene            |
| 305 | mesoplastic (5-25mm) | line     | yellow | 1.15   | Polypropylene            |
| 306 | microplastic (<5mm)  | fragment | white  | 2.51   | Polypropylene            |
| 307 | microplastic (<5mm)  | fragment | green  | 2.23   | Polypropylene            |
| 308 | microplastic (<5mm)  | fragment | white  | 2.92   | Polypropylene            |
| 309 | microplastic (<5mm)  | fragment | white  | 1.5    | Polypropylene            |
| 310 | microplastic (<5mm)  | fragment | white  | 3.41   | Polypropylene            |
| 311 | microplastic (<5mm)  | fragment | white  | 1.02   | Polypropylene            |
| 312 | microplastic (<5mm)  | fragment | white  | 2.31   | Polypropylene            |
| 313 | microplastic (<5mm)  | fragment | white  | <0.01  | Polypropylene            |
| 314 | mesoplastic (5-25mm) | line     | green  | 0.63   | Low-Density Polyethylene |
| 315 | microplastic (<5mm)  | fragment | white  | 17.48  | Low-Density Polyethylene |
| 316 | mesoplastic (5-25mm) | fragment | blue   | 27.79  | Low-Density Polyethylene |
| 317 | microplastic (<5mm)  | fragment | yellow | 7.82   | Low-Density Polyethylene |
| 318 | microplastic (<5mm)  | fragment | green  | 6.73   | Low-Density Polyethylene |
| 319 | microplastic (<5mm)  | fragment | white  | 20.19  | Low-Density Polyethylene |
| 320 | microplastic (<5mm)  | fragment | white  | 2.72   | Low-Density Polyethylene |
| 321 | microplastic (<5mm)  | fragment | white  | 15.42  | Low-Density Polyethylene |
| 322 | microplastic (<5mm)  | fragment | white  | 1.05   | Low-Density Polyethylene |
| 323 | microplastic (<5mm)  | fragment | white  | 4.08   | Low-Density Polyethylene |
| 324 | microplastic (<5mm)  | fragment | blue   | 3.13   | Low-Density Polyethylene |

|     |                      |          |       |       |                          |
|-----|----------------------|----------|-------|-------|--------------------------|
| 325 | microplastic (<5mm)  | fragment | black | 0.27  | Low-Density Polyethylene |
| 326 | microplastic (<5mm)  | fragment | black | 0.34  | Low-Density Polyethylene |
| 327 | microplastic (<5mm)  | fragment | white | 0.24  | Low-Density Polyethylene |
| 328 | microplastic (<5mm)  | fragment | white | 0.19  | Low-Density Polyethylene |
| 329 | microplastic (<5mm)  | fragment | beige | 0.57  | Low-Density Polyethylene |
| 330 | microplastic (<5mm)  | fragment | white | <0.01 | Low-Density Polyethylene |
| 331 | microplastic (<5mm)  | fragment | blue  | 1.03  | Low-Density Polyethylene |
| 332 | microplastic (<5mm)  | fragment | blue  | 7.1   | Low-Density Polyethylene |
| 333 | mesoplastic (5-25mm) | line     | blue  | 1.17  | Low-Density Polyethylene |
| 334 | microplastic (<5mm)  | fragment | white | 18.31 | Low-Density Polyethylene |
| 335 | microplastic (<5mm)  | fragment | white | 5.03  | Low-Density Polyethylene |
| 336 | microplastic (<5mm)  | fragment | gray  | 4.22  | Low-Density Polyethylene |
| 337 | microplastic (<5mm)  | fragment | blue  | 1.21  | Low-Density Polyethylene |
| 338 | microplastic (<5mm)  | fragment | beige | 0.91  | Low-Density Polyethylene |
| 339 | microplastic (<5mm)  | fragment | white | 4.21  | Low-Density Polyethylene |
| 340 | microplastic (<5mm)  | fragment | beige | 4.14  | Low-Density Polyethylene |
| 341 | microplastic (<5mm)  | fragment | beige | 1.14  | Low-Density Polyethylene |
| 342 | microplastic (<5mm)  | fragment | beige | 0.26  | Low-Density Polyethylene |
| 343 | microplastic (<5mm)  | fragment | white | 0.73  | Low-Density Polyethylene |
| 344 | microplastic (<5mm)  | fragment | white | 0.87  | Low-Density Polyethylene |
| 345 | microplastic (<5mm)  | fragment | beige | 2.29  | Low-Density Polyethylene |
| 346 | microplastic (<5mm)  | fragment | white | 0.42  | Low-Density Polyethylene |
| 347 | microplastic (<5mm)  | fragment | white | 0.2   | Low-Density Polyethylene |
| 348 | microplastic (<5mm)  | fragment | white | 0.1   | Low-Density Polyethylene |
| 349 | microplastic (<5mm)  | fragment | blue  | 0.2   | Low-Density Polyethylene |
| 350 | microplastic (<5mm)  | fragment | beige | 0.48  | Low-Density Polyethylene |
| 351 | microplastic (<5mm)  | fragment | white | 0.2   | Low-Density Polyethylene |
| 352 | microplastic (<5mm)  | fragment | white | 0.53  | Low-Density Polyethylene |
| 353 | microplastic (<5mm)  | fragment | white | 15.47 | Low-Density Polyethylene |
| 354 | microplastic (<5mm)  | fragment | black | 3.24  | Low-Density Polyethylene |
| 355 | microplastic (<5mm)  | fragment | beige | 2.3   | Low-Density Polyethylene |
| 356 | microplastic (<5mm)  | fragment | white | 3.82  | Low-Density Polyethylene |
| 357 | microplastic (<5mm)  | fragment | white | 0.62  | Low-Density Polyethylene |
| 358 | microplastic (<5mm)  | fragment | blue  | 0.84  | Low-Density Polyethylene |
| 359 | microplastic (<5mm)  | fragment | white | 0.52  | Low-Density Polyethylene |
| 360 | microplastic (<5mm)  | fragment | white | 1.19  | Low-Density Polyethylene |
| 361 | microplastic (<5mm)  | fragment | green | <0.01 | Low-Density Polyethylene |
| 362 | mesoplastic (5-25mm) | line     | blue  | 1.53  | Low-Density Polyethylene |
| 363 | microplastic (<5mm)  | fragment | beige | 0.44  | Low-Density Polyethylene |
| 364 | microplastic (<5mm)  | fragment | white | 0.14  | Low-Density Polyethylene |
| 365 | microplastic (<5mm)  | fragment | white | <0.01 | Low-Density Polyethylene |
| 366 | microplastic (<5mm)  | fragment | white | 0.09  | Low-Density Polyethylene |
| 367 | microplastic (<5mm)  | fragment | white | <0.01 | Low-Density Polyethylene |
| 368 | microplastic (<5mm)  | fragment | white | 0.08  | Low-Density Polyethylene |
| 369 | microplastic (<5mm)  | fragment | white | <0.01 | Low-Density Polyethylene |
| 370 | microplastic (<5mm)  | line     | white | <0.01 | Low-Density Polyethylene |
| 371 | macroplastic (>25mm) | line     | white | 8.53  | Low-Density Polyethylene |
| 372 | mesoplastic (5-25mm) | line     | white | 1.92  | Low-Density Polyethylene |
| 373 | mesoplastic (5-25mm) | fragment | white | 68.61 | Low-Density Polyethylene |
| 374 | mesoplastic (5-25mm) | line     | blue  | 0.97  | Low-Density Polyethylene |
| 375 | mesoplastic (5-25mm) | line     | gray  | 0.32  | Low-Density Polyethylene |
| 376 | microplastic (<5mm)  | line     | green | 0.28  | Low-Density Polyethylene |
| 377 | microplastic (<5mm)  | fragment | white | 1.09  | Low-Density Polyethylene |
| 378 | microplastic (<5mm)  | line     | white | 0.39  | Low-Density Polyethylene |
| 379 | microplastic (<5mm)  | fragment | white | <0.01 | Low-Density Polyethylene |
| 380 | microplastic (<5mm)  | fragment | green | 1.28  | Low-Density Polyethylene |
| 381 | microplastic (<5mm)  | fragment | beige | 0.49  | Low-Density Polyethylene |
| 382 | microplastic (<5mm)  | fragment | gray  | 0.65  | Low-Density Polyethylene |
| 383 | microplastic (<5mm)  | fragment | green | 0.67  | Low-Density Polyethylene |
| 384 | microplastic (<5mm)  | fragment | beige | 0.56  | Low-Density Polyethylene |
| 385 | microplastic (<5mm)  | fragment | white | 0.42  | Low-Density Polyethylene |
| 386 | microplastic (<5mm)  | line     | white | 0.25  | Low-Density Polyethylene |
| 387 | microplastic (<5mm)  | fragment | blue  | 0.07  | Low-Density Polyethylene |
| 388 | microplastic (<5mm)  | fragment | green | 0.08  | Low-Density Polyethylene |
| 389 | microplastic (<5mm)  | line     | blue  | 0.21  | Low-Density Polyethylene |

|     |                      |          |           |        |                          |
|-----|----------------------|----------|-----------|--------|--------------------------|
| 390 | microplastic (<5mm)  | line     | green     | 0.06   | Low-Density Polyethylene |
| 391 | microplastic (<5mm)  | fragment | white     | 2.61   | Low-Density Polyethylene |
| 392 | microplastic (<5mm)  | fragment | white     | 5.77   | Low-Density Polyethylene |
| 393 | macroplastic (>25mm) | sheet    | black     | 293.35 | Low-Density Polyethylene |
| 394 | macroplastic (>25mm) | sheet    | black     | 137.68 | Low-Density Polyethylene |
| 395 | macroplastic (>25mm) | sheet    | colorless | 126.01 | Low-Density Polyethylene |
| 396 | macroplastic (>25mm) | sheet    | green     | 70.25  | Low-Density Polyethylene |
| 397 | mesoplastic (5-25mm) | fragment | yellow    | 220.54 | Low-Density Polyethylene |
| 398 | macroplastic (>25mm) | line     | white     | 3.73   | Low-Density Polyethylene |
| 399 | mesoplastic (5-25mm) | fragment | green     | 56.54  | Low-Density Polyethylene |
| 400 | mesoplastic (5-25mm) | fragment | white     | 78.75  | Low-Density Polyethylene |
| 401 | macroplastic (>25mm) | sheet    | black     | 26.68  | Low-Density Polyethylene |
| 402 | mesoplastic (5-25mm) | fragment | gray      | 304.18 | Low-Density Polyethylene |
| 403 | mesoplastic (5-25mm) | fragment | beige     | 35.63  | Low-Density Polyethylene |
| 404 | microplastic (<5mm)  | fragment | white     | 15.99  | Low-Density Polyethylene |
| 405 | microplastic (<5mm)  | fragment | blue      | 2.42   | Low-Density Polyethylene |
| 406 | microplastic (<5mm)  | nurdle   | beige     | 15.73  | Low-Density Polyethylene |
| 407 | mesoplastic (5-25mm) | fragment | white     | 75.92  | Low-Density Polyethylene |
| 408 | microplastic (<5mm)  | fragment | beige     | 8.19   | Low-Density Polyethylene |
| 409 | microplastic (<5mm)  | fragment | beige     | 20.75  | Low-Density Polyethylene |
| 410 | microplastic (<5mm)  | fragment | black     | 7.04   | Low-Density Polyethylene |
| 411 | microplastic (<5mm)  | fragment | black     | 15.4   | Low-Density Polyethylene |
| 412 | microplastic (<5mm)  | fragment | white     | 11.05  | Low-Density Polyethylene |
| 413 | microplastic (<5mm)  | fragment | blue      | 13.27  | Low-Density Polyethylene |
| 414 | microplastic (<5mm)  | fragment | white     | 14.1   | Low-Density Polyethylene |
| 415 | microplastic (<5mm)  | fragment | white     | 5.75   | Low-Density Polyethylene |
| 416 | mesoplastic (5-25mm) | fragment | gray      | 445.6  | Low-Density Polyethylene |
| 417 | mesoplastic (5-25mm) | fragment | white     | 58.86  | Low-Density Polyethylene |
| 418 | mesoplastic (5-25mm) | fragment | white     | 17.66  | Low-Density Polyethylene |
| 419 | mesoplastic (5-25mm) | fragment | blue      | 52.3   | Low-Density Polyethylene |
| 420 | microplastic (<5mm)  | fragment | beige     | 23.17  | Low-Density Polyethylene |
| 421 | macroplastic (>25mm) | line     | gray      | 2.02   | Low-Density Polyethylene |
| 422 | mesoplastic (5-25mm) | fragment | white     | 22.28  | Low-Density Polyethylene |
| 423 | mesoplastic (5-25mm) | fragment | white     | 27.57  | Low-Density Polyethylene |
| 424 | microplastic (<5mm)  | nurdle   | white     | 20.01  | Low-Density Polyethylene |
| 425 | microplastic (<5mm)  | nurdle   | white     | 20.04  | Low-Density Polyethylene |
| 426 | microplastic (<5mm)  | nurdle   | white     | 10.63  | Low-Density Polyethylene |
| 427 | microplastic (<5mm)  | nurdle   | white     | 7.4    | Low-Density Polyethylene |
| 428 | mesoplastic (5-25mm) | sheet    | colorless | 12.92  | Low-Density Polyethylene |
| 429 | mesoplastic (5-25mm) | fragment | white     | 18.7   | Low-Density Polyethylene |
| 430 | macroplastic (>25mm) | line     | black     | 8.79   | Low-Density Polyethylene |
| 431 | mesoplastic (5-25mm) | sheet    | black     | 14.62  | Low-Density Polyethylene |
| 432 | microplastic (<5mm)  | fragment | white     | 30.95  | Low-Density Polyethylene |
| 433 | mesoplastic (5-25mm) | fragment | white     | 38.45  | Low-Density Polyethylene |
| 434 | mesoplastic (5-25mm) | sheet    | black     | 4.73   | Low-Density Polyethylene |
| 435 | mesoplastic (5-25mm) | fragment | white     | 10.6   | Low-Density Polyethylene |
| 436 | microplastic (<5mm)  | nurdle   | beige     | 24.09  | Low-Density Polyethylene |
| 437 | microplastic (<5mm)  | nurdle   | beige     | 21.46  | Low-Density Polyethylene |
| 438 | microplastic (<5mm)  | nurdle   | beige     | 13.96  | Low-Density Polyethylene |
| 439 | microplastic (<5mm)  | fragment | white     | 13     | Low-Density Polyethylene |
| 440 | microplastic (<5mm)  | fragment | blue      | 19.09  | Low-Density Polyethylene |
| 441 | mesoplastic (5-25mm) | fragment | beige     | 12.64  | Low-Density Polyethylene |
| 442 | microplastic (<5mm)  | fragment | white     | 9.79   | Low-Density Polyethylene |
| 443 | microplastic (<5mm)  | fragment | white     | 5.6    | Low-Density Polyethylene |
| 444 | microplastic (<5mm)  | fragment | white     | 5.39   | Low-Density Polyethylene |
| 445 | microplastic (<5mm)  | fragment | yellow    | 1.48   | Low-Density Polyethylene |
| 446 | mesoplastic (5-25mm) | line     | white     | 1.72   | Low-Density Polyethylene |
| 447 | mesoplastic (5-25mm) | fragment | blue      | 12.51  | Low-Density Polyethylene |
| 448 | mesoplastic (5-25mm) | fragment | white     | 24.97  | Low-Density Polyethylene |
| 449 | mesoplastic (5-25mm) | fragment | white     | 32.03  | Low-Density Polyethylene |
| 450 | microplastic (<5mm)  | fragment | green     | 12.86  | Low-Density Polyethylene |
| 451 | mesoplastic (5-25mm) | fragment | black     | 14.17  | Low-Density Polyethylene |
| 452 | microplastic (<5mm)  | fragment | blue      | 4.08   | Low-Density Polyethylene |
| 453 | microplastic (<5mm)  | fragment | white     | 17.57  | Low-Density Polyethylene |
| 454 | microplastic (<5mm)  | fragment | beige     | 12.1   | Low-Density Polyethylene |

|     |                      |          |           |       |                          |
|-----|----------------------|----------|-----------|-------|--------------------------|
| 455 | microplastic (<5mm)  | fragment | red       | 3.79  | Low-Density Polyethylene |
| 456 | mesoplastic (5-25mm) | fragment | white     | 14.78 | Low-Density Polyethylene |
| 457 | microplastic (<5mm)  | fragment | green     | 9.38  | Low-Density Polyethylene |
| 458 | microplastic (<5mm)  | fragment | beige     | 26.02 | Low-Density Polyethylene |
| 459 | microplastic (<5mm)  | fragment | beige     | 18.26 | Low-Density Polyethylene |
| 460 | microplastic (<5mm)  | fragment | brown     | 12.31 | Low-Density Polyethylene |
| 461 | mesoplastic (5-25mm) | fragment | white     | 24.09 | Low-Density Polyethylene |
| 462 | microplastic (<5mm)  | fragment | green     | 3.05  | Low-Density Polyethylene |
| 463 | microplastic (<5mm)  | fragment | blue      | 4.65  | Low-Density Polyethylene |
| 464 | microplastic (<5mm)  | fragment | blue      | 11.25 | Low-Density Polyethylene |
| 465 | microplastic (<5mm)  | fragment | white     | 26.04 | Low-Density Polyethylene |
| 466 | microplastic (<5mm)  | fragment | white     | 11.47 | Low-Density Polyethylene |
| 467 | microplastic (<5mm)  | fragment | beige     | 11.6  | Low-Density Polyethylene |
| 468 | microplastic (<5mm)  | fragment | white     | 10.05 | Low-Density Polyethylene |
| 469 | microplastic (<5mm)  | fragment | black     | 23.27 | Low-Density Polyethylene |
| 470 | microplastic (<5mm)  | fragment | gray      | 12.32 | Low-Density Polyethylene |
| 471 | microplastic (<5mm)  | fragment | orange    | 4.43  | Low-Density Polyethylene |
| 472 | microplastic (<5mm)  | foam     | white     | 0.93  | Low-Density Polyethylene |
| 473 | microplastic (<5mm)  | fragment | beige     | 14.94 | Low-Density Polyethylene |
| 474 | microplastic (<5mm)  | nurdle   | white     | 10.87 | Low-Density Polyethylene |
| 475 | microplastic (<5mm)  | fragment | white     | 13.12 | Low-Density Polyethylene |
| 476 | microplastic (<5mm)  | fragment | brown     | 9.89  | Low-Density Polyethylene |
| 477 | microplastic (<5mm)  | fragment | blue      | 2.99  | Low-Density Polyethylene |
| 478 | microplastic (<5mm)  | fragment | black     | 11.89 | Low-Density Polyethylene |
| 479 | microplastic (<5mm)  | nurdle   | beige     | 6.1   | Low-Density Polyethylene |
| 480 | microplastic (<5mm)  | fragment | gray      | 4.92  | Low-Density Polyethylene |
| 481 | microplastic (<5mm)  | fragment | beige     | 10.25 | Low-Density Polyethylene |
| 482 | microplastic (<5mm)  | fragment | blue      | 1.99  | Low-Density Polyethylene |
| 483 | microplastic (<5mm)  | fragment | green     | 0.86  | Low-Density Polyethylene |
| 484 | microplastic (<5mm)  | fragment | beige     | 7.22  | Low-Density Polyethylene |
| 485 | microplastic (<5mm)  | fragment | beige     | 8.14  | Low-Density Polyethylene |
| 486 | mesoplastic (5-25mm) | line     | blue      | 4.59  | Low-Density Polyethylene |
| 487 | microplastic (<5mm)  | fragment | beige     | 13.17 | Low-Density Polyethylene |
| 488 | microplastic (<5mm)  | fragment | green     | 6.56  | Low-Density Polyethylene |
| 489 | microplastic (<5mm)  | fragment | blue      | 5.56  | Low-Density Polyethylene |
| 490 | microplastic (<5mm)  | fragment | white     | 9.43  | Low-Density Polyethylene |
| 491 | microplastic (<5mm)  | fragment | white     | 19.12 | Low-Density Polyethylene |
| 492 | microplastic (<5mm)  | sheet    | colorless | 1.19  | Low-Density Polyethylene |
| 493 | microplastic (<5mm)  | sheet    | colorless | 0.56  | Low-Density Polyethylene |
| 494 | mesoplastic (5-25mm) | sheet    | colorless | 0.8   | Low-Density Polyethylene |
| 495 | microplastic (<5mm)  | sheet    | purple    | 0.1   | Low-Density Polyethylene |
| 496 | microplastic (<5mm)  | fragment | blue      | 4.08  | Low-Density Polyethylene |
| 497 | microplastic (<5mm)  | fragment | white     | 9.78  | Low-Density Polyethylene |
| 498 | microplastic (<5mm)  | sheet    | black     | 0.59  | Low-Density Polyethylene |
| 499 | microplastic (<5mm)  | fragment | beige     | 9.51  | Low-Density Polyethylene |
| 500 | microplastic (<5mm)  | fragment | blue      | 4.73  | Low-Density Polyethylene |
| 501 | mesoplastic (5-25mm) | sheet    | black     | 2.12  | Low-Density Polyethylene |
| 502 | microplastic (<5mm)  | fragment | green     | 1.12  | Low-Density Polyethylene |
| 503 | microplastic (<5mm)  | fragment | beige     | 8.97  | Low-Density Polyethylene |
| 504 | microplastic (<5mm)  | fragment | yellow    | 0.963 | Low-Density Polyethylene |
| 505 | microplastic (<5mm)  | fragment | yellow    | 1.68  | Low-Density Polyethylene |
| 506 | microplastic (<5mm)  | fragment | beige     | 4.72  | Low-Density Polyethylene |
| 507 | microplastic (<5mm)  | fragment | beige     | 1.34  | Low-Density Polyethylene |
| 508 | microplastic (<5mm)  | fragment | gray      | 3.63  | Low-Density Polyethylene |
| 509 | microplastic (<5mm)  | fragment | gray      | 5.79  | Low-Density Polyethylene |
| 510 | microplastic (<5mm)  | fragment | beige     | 1.78  | Low-Density Polyethylene |
| 511 | microplastic (<5mm)  | fragment | beige     | 1.58  | Low-Density Polyethylene |
| 512 | microplastic (<5mm)  | fragment | beige     | 0.53  | Low-Density Polyethylene |
| 513 | microplastic (<5mm)  | fragment | brown     | 1.91  | Low-Density Polyethylene |
| 514 | microplastic (<5mm)  | fragment | gray      | 1.03  | Low-Density Polyethylene |
| 515 | microplastic (<5mm)  | sheet    | black     | 0.3   | Low-Density Polyethylene |
| 516 | microplastic (<5mm)  | fragment | brown     | 0.64  | Low-Density Polyethylene |
| 517 | microplastic (<5mm)  | fragment | brown     | 0.37  | Low-Density Polyethylene |
| 518 | microplastic (<5mm)  | fragment | white     | 2.93  | Low-Density Polyethylene |
| 519 | microplastic (<5mm)  | fragment | white     | 6.4   | Low-Density Polyethylene |



|     |                      |          |        |       |                           |
|-----|----------------------|----------|--------|-------|---------------------------|
| 520 | mesoplastic (5-25mm) | line     | gray   | 1.98  | Low-Density Polyethylene  |
| 521 | mesoplastic (5-25mm) | sheet    | black  | 3.61  | Low-Density Polyethylene  |
| 522 | mesoplastic (5-25mm) | line     | green  | 1.25  | Low-Density Polyethylene  |
| 523 | mesoplastic (5-25mm) | sheet    | black  | 3.06  | Low-Density Polyethylene  |
| 524 | microplastic (<5mm)  | fragment | green  | 1.13  | Low-Density Polyethylene  |
| 525 | microplastic (<5mm)  | fragment | green  | 0.81  | Low-Density Polyethylene  |
| 526 | microplastic (<5mm)  | fragment | green  | 0.33  | Low-Density Polyethylene  |
| 527 | microplastic (<5mm)  | fragment | blue   | 5.55  | Low-Density Polyethylene  |
| 528 | microplastic (<5mm)  | fragment | blue   | 1.31  | Low-Density Polyethylene  |
| 529 | microplastic (<5mm)  | fragment | blue   | 0.37  | Low-Density Polyethylene  |
| 530 | microplastic (<5mm)  | fragment | blue   | 0.68  | Low-Density Polyethylene  |
| 531 | microplastic (<5mm)  | fragment | white  | 2.54  | Low-Density Polyethylene  |
| 532 | microplastic (<5mm)  | fragment | white  | 3.36  | Low-Density Polyethylene  |
| 533 | microplastic (<5mm)  | fragment | white  | 3.41  | Low-Density Polyethylene  |
| 534 | microplastic (<5mm)  | fragment | white  | 3.2   | Low-Density Polyethylene  |
| 535 | microplastic (<5mm)  | fragment | white  | 2.36  | Low-Density Polyethylene  |
| 536 | microplastic (<5mm)  | fragment | white  | 3.54  | Low-Density Polyethylene  |
| 537 | microplastic (<5mm)  | fragment | white  | 2.16  | Low-Density Polyethylene  |
| 538 | microplastic (<5mm)  | fragment | white  | 2.38  | Low-Density Polyethylene  |
| 539 | microplastic (<5mm)  | fragment | white  | 1.89  | Low-Density Polyethylene  |
| 540 | microplastic (<5mm)  | fragment | white  | 2.3   | Low-Density Polyethylene  |
| 541 | microplastic (<5mm)  | fragment | white  | 2.05  | Low-Density Polyethylene  |
| 542 | microplastic (<5mm)  | fragment | white  | 1.79  | Low-Density Polyethylene  |
| 543 | microplastic (<5mm)  | fragment | white  | 0.66  | Low-Density Polyethylene  |
| 544 | microplastic (<5mm)  | fragment | white  | 2.62  | Low-Density Polyethylene  |
| 545 | microplastic (<5mm)  | fragment | white  | 1.92  | Low-Density Polyethylene  |
| 546 | microplastic (<5mm)  | fragment | white  | 3.42  | Low-Density Polyethylene  |
| 547 | microplastic (<5mm)  | fragment | white  | 1.72  | Low-Density Polyethylene  |
| 548 | microplastic (<5mm)  | line     | white  | 0.7   | Low-Density Polyethylene  |
| 549 | microplastic (<5mm)  | fragment | white  | 1.9   | Low-Density Polyethylene  |
| 550 | microplastic (<5mm)  | fragment | white  | 1.47  | Low-Density Polyethylene  |
| 551 | mesoplastic (5-25mm) | line     | orange | 0.8   | Low-Density Polyethylene  |
| 552 | microplastic (<5mm)  | fragment | white  | 1     | Low-Density Polyethylene  |
| 553 | microplastic (<5mm)  | fragment | green  | 0.76  | High-Density Polyethylene |
| 554 | microplastic (<5mm)  | fragment | white  | 1.46  | High-Density Polyethylene |
| 555 | microplastic (<5mm)  | fragment | white  | 1.72  | High-Density Polyethylene |
| 556 | microplastic (<5mm)  | fragment | white  | 0.39  | High-Density Polyethylene |
| 557 | microplastic (<5mm)  | fragment | white  | 0.58  | High-Density Polyethylene |
| 558 | microplastic (<5mm)  | fragment | white  | 0.33  | High-Density Polyethylene |
| 559 | microplastic (<5mm)  | fragment | white  | 0.94  | High-Density Polyethylene |
| 560 | microplastic (<5mm)  | fragment | white  | 0.47  | High-Density Polyethylene |
| 561 | microplastic (<5mm)  | fragment | white  | 0.22  | High-Density Polyethylene |
| 562 | macroplastic (>25mm) | line     | blue   | 2.34  | High-Density Polyethylene |
| 563 | microplastic (<5mm)  | line     | gray   | 0.2   | High-Density Polyethylene |
| 564 | microplastic (<5mm)  | fragment | white  | 5.84  | High-Density Polyethylene |
| 565 | microplastic (<5mm)  | fragment | white  | 2.18  | High-Density Polyethylene |
| 566 | microplastic (<5mm)  | fragment | white  | 7.48  | High-Density Polyethylene |
| 567 | microplastic (<5mm)  | fragment | white  | 2.1   | High-Density Polyethylene |
| 568 | microplastic (<5mm)  | fragment | beige  | 10.03 | High-Density Polyethylene |
| 569 | microplastic (<5mm)  | fragment | white  | 28.42 | High-Density Polyethylene |
| 570 | microplastic (<5mm)  | fragment | white  | 2.54  | High-Density Polyethylene |
| 571 | microplastic (<5mm)  | fragment | blue   | 6.42  | High-Density Polyethylene |
| 572 | microplastic (<5mm)  | fragment | white  | 4.74  | High-Density Polyethylene |
| 573 | microplastic (<5mm)  | fragment | beige  | 1.94  | High-Density Polyethylene |
| 574 | microplastic (<5mm)  | fragment | green  | 0.27  | High-Density Polyethylene |
| 575 | microplastic (<5mm)  | fragment | beige  | 3.61  | High-Density Polyethylene |
| 576 | microplastic (<5mm)  | fragment | white  | 1.37  | High-Density Polyethylene |
| 577 | microplastic (<5mm)  | fragment | white  | 9.23  | High-Density Polyethylene |
| 578 | microplastic (<5mm)  | fragment | white  | 0.91  | High-Density Polyethylene |
| 579 | microplastic (<5mm)  | fragment | green  | 0.48  | High-Density Polyethylene |
| 580 | mesoplastic (5-25mm) | line     | gray   | 0.67  | High-Density Polyethylene |
| 581 | mesoplastic (5-25mm) | line     | white  | 0.93  | High-Density Polyethylene |
| 582 | microplastic (<5mm)  | fragment | beige  | 14.32 | High-Density Polyethylene |
| 583 | mesoplastic (5-25mm) | line     | gray   | 0.68  | High-Density Polyethylene |
| 584 | microplastic (<5mm)  | fragment | white  | 0.56  | High-Density Polyethylene |

|     |                      |          |        |        |                           |
|-----|----------------------|----------|--------|--------|---------------------------|
| 585 | microplastic (<5mm)  | fragment | green  | 0.16   | High-Density Polyethylene |
| 586 | microplastic (<5mm)  | fragment | blue   | 0.46   | High-Density Polyethylene |
| 587 | microplastic (<5mm)  | fragment | white  | 0.12   | High-Density Polyethylene |
| 588 | microplastic (<5mm)  | fragment | blue   | 0.2    | High-Density Polyethylene |
| 589 | microplastic (<5mm)  | fragment | white  | 0.24   | High-Density Polyethylene |
| 590 | microplastic (<5mm)  | fragment | white  | 0.16   | High-Density Polyethylene |
| 591 | microplastic (<5mm)  | line     | gray   | 0.06   | High-Density Polyethylene |
| 592 | microplastic (<5mm)  | fragment | white  | 0.21   | High-Density Polyethylene |
| 593 | microplastic (<5mm)  | fragment | white  | 10.39  | High-Density Polyethylene |
| 594 | microplastic (<5mm)  | fragment | white  | 2.89   | High-Density Polyethylene |
| 595 | macroplastic (>25mm) | line     | green  | 93.59  | High-Density Polyethylene |
| 596 | macroplastic (>25mm) | line     | green  | 11.53  | High-Density Polyethylene |
| 597 | microplastic (<5mm)  | fragment | white  | 10.01  | High-Density Polyethylene |
| 598 | mesoplastic (5-25mm) | fragment | blue   | 552.95 | High-Density Polyethylene |
| 599 | mesoplastic (5-25mm) | fragment | white  | 405.09 | High-Density Polyethylene |
| 600 | mesoplastic (5-25mm) | fragment | white  | 122.54 | High-Density Polyethylene |
| 601 | macroplastic (>25mm) | line     | gray   | 2.1    | High-Density Polyethylene |
| 602 | mesoplastic (5-25mm) | fragment | white  | 16.41  | High-Density Polyethylene |
| 603 | mesoplastic (5-25mm) | fragment | white  | 69.44  | High-Density Polyethylene |
| 604 | mesoplastic (5-25mm) | fragment | white  | 37.56  | High-Density Polyethylene |
| 605 | macroplastic (>25mm) | line     | green  | 1.79   | High-Density Polyethylene |
| 606 | microplastic (<5mm)  | fragment | green  | 13.2   | High-Density Polyethylene |
| 607 | microplastic (<5mm)  | fragment | blue   | 7.42   | High-Density Polyethylene |
| 608 | microplastic (<5mm)  | fragment | white  | 5.62   | High-Density Polyethylene |
| 609 | microplastic (<5mm)  | fragment | blue   | 4.96   | High-Density Polyethylene |
| 610 | mesoplastic (5-25mm) | fragment | white  | 177.35 | High-Density Polyethylene |
| 611 | mesoplastic (5-25mm) | fragment | brown  | 196.55 | High-Density Polyethylene |
| 612 | mesoplastic (5-25mm) | fragment | white  | 90.73  | High-Density Polyethylene |
| 613 | mesoplastic (5-25mm) | fragment | green  | 20.25  | High-Density Polyethylene |
| 614 | mesoplastic (5-25mm) | sheet    | white  | 13.96  | High-Density Polyethylene |
| 615 | mesoplastic (5-25mm) | fragment | beige  | 40.6   | High-Density Polyethylene |
| 616 | mesoplastic (5-25mm) | fragment | white  | 46.12  | High-Density Polyethylene |
| 617 | mesoplastic (5-25mm) | fragment | white  | 33.21  | High-Density Polyethylene |
| 618 | mesoplastic (5-25mm) | fragment | blue   | 185.2  | High-Density Polyethylene |
| 619 | mesoplastic (5-25mm) | fragment | white  | 19.45  | High-Density Polyethylene |
| 620 | mesoplastic (5-25mm) | fragment | yellow | 136.65 | High-Density Polyethylene |
| 621 | mesoplastic (5-25mm) | fragment | white  | 52.07  | High-Density Polyethylene |
| 622 | mesoplastic (5-25mm) | fragment | white  | 39.73  | High-Density Polyethylene |
| 623 | macroplastic (>25mm) | line     | white  | 3.7    | High-Density Polyethylene |
| 624 | mesoplastic (5-25mm) | fragment | beige  | 60.47  | High-Density Polyethylene |
| 625 | mesoplastic (5-25mm) | fragment | white  | 34.49  | High-Density Polyethylene |
| 626 | microplastic (<5mm)  | fragment | white  | 1.78   | High-Density Polyethylene |
| 627 | mesoplastic (5-25mm) | fragment | white  | 17.96  | High-Density Polyethylene |
| 628 | mesoplastic (5-25mm) | line     | white  | 0.7    | High-Density Polyethylene |
| 629 | microplastic (<5mm)  | fragment | white  | 16.8   | High-Density Polyethylene |
| 630 | mesoplastic (5-25mm) | fragment | white  | 31.45  | High-Density Polyethylene |
| 631 | mesoplastic (5-25mm) | fragment | white  | 27.1   | High-Density Polyethylene |
| 632 | microplastic (<5mm)  | nurdle   | white  | 17.18  | High-Density Polyethylene |
| 633 | microplastic (<5mm)  | nurdle   | white  | 19.77  | High-Density Polyethylene |
| 634 | microplastic (<5mm)  | nurdle   | white  | 13.72  | High-Density Polyethylene |
| 635 | microplastic (<5mm)  | fragment | white  | 2.97   | High-Density Polyethylene |
| 636 | microplastic (<5mm)  | fragment | beige  | 9.06   | High-Density Polyethylene |
| 637 | mesoplastic (5-25mm) | fragment | blue   | 19.87  | High-Density Polyethylene |
| 638 | mesoplastic (5-25mm) | fragment | white  | 16.95  | High-Density Polyethylene |
| 639 | microplastic (<5mm)  | fragment | white  | 8.06   | High-Density Polyethylene |
| 640 | microplastic (<5mm)  | fragment | white  | 3.92   | High-Density Polyethylene |
| 641 | microplastic (<5mm)  | fragment | white  | 1.9    | High-Density Polyethylene |
| 642 | microplastic (<5mm)  | fragment | white  | 1.47   | High-Density Polyethylene |
| 643 | mesoplastic (5-25mm) | fragment | white  | 19.22  | High-Density Polyethylene |
| 644 | mesoplastic (5-25mm) | fragment | white  | 18.57  | High-Density Polyethylene |
| 645 | mesoplastic (5-25mm) | fragment | white  | 18.83  | High-Density Polyethylene |
| 646 | mesoplastic (5-25mm) | fragment | black  | 6.92   | High-Density Polyethylene |
| 647 | mesoplastic (5-25mm) | fragment | white  | 11.18  | High-Density Polyethylene |
| 648 | microplastic (<5mm)  | fragment | blue   | 13.26  | High-Density Polyethylene |
| 649 | microplastic (<5mm)  | fragment | white  | 16     | High-Density Polyethylene |

|     |                      |          |        |       |                           |
|-----|----------------------|----------|--------|-------|---------------------------|
| 650 | microplastic (<5mm)  | fragment | white  | 8.38  | High-Density Polyethylene |
| 651 | microplastic (<5mm)  | fragment | white  | 24.2  | High-Density Polyethylene |
| 652 | microplastic (<5mm)  | fragment | yellow | 4.73  | High-Density Polyethylene |
| 653 | microplastic (<5mm)  | fragment | white  | 10.37 | High-Density Polyethylene |
| 654 | microplastic (<5mm)  | fragment | white  | 16.07 | High-Density Polyethylene |
| 655 | microplastic (<5mm)  | fragment | white  | 7.43  | High-Density Polyethylene |
| 656 | microplastic (<5mm)  | fragment | white  | 5.34  | High-Density Polyethylene |
| 657 | microplastic (<5mm)  | fragment | white  | 7.72  | High-Density Polyethylene |
| 658 | microplastic (<5mm)  | fragment | white  | 8.8   | High-Density Polyethylene |
| 659 | microplastic (<5mm)  | fragment | blue   | 3.42  | High-Density Polyethylene |
| 660 | microplastic (<5mm)  | fragment | white  | 5.45  | High-Density Polyethylene |
| 661 | microplastic (<5mm)  | fragment | white  | 5     | High-Density Polyethylene |
| 662 | microplastic (<5mm)  | fragment | white  | 10.11 | High-Density Polyethylene |
| 663 | mesoplastic (5-25mm) | fragment | black  | 8.49  | High-Density Polyethylene |
| 664 | microplastic (<5mm)  | fragment | blue   | 6.42  | High-Density Polyethylene |
| 665 | microplastic (<5mm)  | fragment | beige  | 8.65  | High-Density Polyethylene |
| 666 | microplastic (<5mm)  | fragment | white  | 10.52 | High-Density Polyethylene |
| 667 | microplastic (<5mm)  | fragment | blue   | 4.39  | High-Density Polyethylene |
| 668 | microplastic (<5mm)  | fragment | white  | 8.65  | High-Density Polyethylene |
| 669 | microplastic (<5mm)  | fragment | green  | 0.88  | High-Density Polyethylene |
| 670 | microplastic (<5mm)  | fragment | white  | 9.3   | High-Density Polyethylene |
| 671 | microplastic (<5mm)  | fragment | white  | 8.23  | High-Density Polyethylene |
| 672 | microplastic (<5mm)  | fragment | white  | 2.8   | High-Density Polyethylene |
| 673 | microplastic (<5mm)  | fragment | white  | 3.73  | High-Density Polyethylene |
| 674 | microplastic (<5mm)  | fragment | white  | 2.52  | High-Density Polyethylene |
| 675 | microplastic (<5mm)  | fragment | white  | 2.91  | High-Density Polyethylene |
| 676 | microplastic (<5mm)  | fragment | white  | 3.39  | High-Density Polyethylene |
| 677 | macroplastic (>25mm) | line     | white  | 2.6   | High-Density Polyethylene |
| 678 | mesoplastic (5-25mm) | line     | gray   | 0.97  | High-Density Polyethylene |
| 679 | microplastic (<5mm)  | fragment | white  | 2.98  | High-Density Polyethylene |
| 680 | mesoplastic (5-25mm) | line     | white  | 0.97  | High-Density Polyethylene |
| 681 | microplastic (<5mm)  | fragment | white  | 3.81  | High-Density Polyethylene |
| 682 | microplastic (<5mm)  | fragment | blue   | 6.04  | High-Density Polyethylene |
| 683 | microplastic (<5mm)  | fragment | blue   | 4.04  | High-Density Polyethylene |
| 684 | microplastic (<5mm)  | fragment | blue   | 1.05  | High-Density Polyethylene |
| 685 | microplastic (<5mm)  | fragment | blue   | 1.22  | High-Density Polyethylene |
| 686 | microplastic (<5mm)  | fragment | blue   | 0.52  | High-Density Polyethylene |
| 687 | microplastic (<5mm)  | fragment | blue   | 0.17  | High-Density Polyethylene |
| 688 | microplastic (<5mm)  | fragment | white  | 5.3   | High-Density Polyethylene |
| 689 | microplastic (<5mm)  | fragment | white  | 2.29  | High-Density Polyethylene |
| 690 | microplastic (<5mm)  | fragment | white  | 4.04  | High-Density Polyethylene |
| 691 | microplastic (<5mm)  | fragment | white  | 2.11  | High-Density Polyethylene |
| 692 | microplastic (<5mm)  | fragment | white  | 4.5   | High-Density Polyethylene |
| 693 | microplastic (<5mm)  | fragment | white  | 2.9   | High-Density Polyethylene |
| 694 | microplastic (<5mm)  | fragment | white  | 0.93  | High-Density Polyethylene |
| 695 | microplastic (<5mm)  | fragment | white  | 1.2   | High-Density Polyethylene |
| 696 | microplastic (<5mm)  | fragment | white  | 1.5   | High-Density Polyethylene |
| 697 | microplastic (<5mm)  | fragment | white  | 2.22  | High-Density Polyethylene |
| 698 | microplastic (<5mm)  | fragment | white  | 0.56  | High-Density Polyethylene |
| 699 | microplastic (<5mm)  | fragment | white  | 1.41  | High-Density Polyethylene |
| 700 | microplastic (<5mm)  | fragment | white  | 0.37  | High-Density Polyethylene |
| 701 | microplastic (<5mm)  | fragment | white  | 0.87  | High-Density Polyethylene |
| 702 | microplastic (<5mm)  | fragment | white  | 0.83  | High-Density Polyethylene |
| 703 | macroplastic (>25mm) | line     | white  | 1.2   | Ethylene Vinyl Acetate    |
| 704 | microplastic (<5mm)  | line     | orange | 0.37  | Ethylene Vinyl Acetate    |
| 705 | microplastic (<5mm)  | fragment | white  | 0.21  | Ethylene Vinyl Acetate    |
| 706 | mesoplastic (5-25mm) | fragment | green  | 16.57 | Ethylene Vinyl Acetate    |
| 707 | microplastic (<5mm)  | fragment | green  | 2.49  | Ethylene Vinyl Acetate    |

**Table S3.** Taxa, size, year, tow location (inside or outside of slick) and ingested particle traits of larval fish dissections.

| Family     | Taxa                  | Dissection ID | Year | Tow Location<br>(Inside or Outside<br>Slick) | Fish Size<br>(mm, TL) | Plastic debris      |            |            | Raman and FT-IR Material<br>Identification |                         |
|------------|-----------------------|---------------|------|----------------------------------------------|-----------------------|---------------------|------------|------------|--------------------------------------------|-------------------------|
|            |                       |               |      |                                              |                       | found in<br>stomach | Item Count | Item shape |                                            | Item Color              |
| Balistidae | Balistidae            | BAL-001       | 2016 | Inside                                       | 10                    | No                  | 0          | NA         | NA                                         | NA                      |
| Balistidae | Balistidae            | BAL-002       | 2016 | Inside                                       | 9                     | No                  | 0          | NA         | NA                                         | NA                      |
| Balistidae | Balistidae            | BAL-003       | 2017 | Inside                                       | 22                    | No                  | 0          | NA         | NA                                         | NA                      |
| Balistidae | Balistidae            | BAL-004       | 2017 | Outside                                      | 7                     | No                  | 0          | NA         | NA                                         | NA                      |
| Balistidae | Balistidae            | BAL-005       | 2017 | Inside                                       | 9                     | No                  | 0          | NA         | NA                                         | NA                      |
| Balistidae | Balistidae            | BAL-006       | 2017 | Inside                                       | 9                     | No                  | 0          | NA         | NA                                         | NA                      |
| Balistidae | Canthidermis maculata | BAL-007       | 2017 | Inside                                       | 15                    | Yes                 | 1          | fiber      | translucent                                | unknown material        |
| Balistidae | Canthidermis maculata | BAL-008       | 2017 | Inside                                       | 8                     | Yes                 | 1          | fiber      | blue                                       | anthropogenic cellulose |
| Balistidae | Balistidae            | BAL-009       | 2017 | Inside                                       | 7                     | No                  | 0          | NA         | NA                                         | NA                      |
| Balistidae | Balistidae            | BAL-010       | 2018 | Inside                                       | 28                    | No                  | 0          | NA         | NA                                         | NA                      |
| Balistidae | Canthidermis maculata | BAL-011       | 2018 | Inside                                       | 9                     | Yes                 | 1          | fiber      | blue                                       | anthropogenic cellulose |
| Balistidae | Balistidae            | BAL-012       | 2018 | Inside                                       | 8                     | No                  | 0          | NA         | NA                                         | NA                      |
| Balistidae | Balistidae            | BAL-013       | 2018 | Inside                                       | 11                    | No                  | 0          | NA         | NA                                         | NA                      |
| Balistidae | Balistidae            | BAL-014       | 2018 | Inside                                       | 14                    | No                  | 0          | NA         | NA                                         | NA                      |
| Balistidae | Canthidermis maculata | BAL-015       | 2018 | Outside                                      | 6                     | Yes                 | 1          | fiber      | translucent                                | anthropogenic cellulose |
| Balistidae | Balistidae            | BAL-016       | 2016 | Inside                                       | 10                    | No                  | 0          | NA         | NA                                         | NA                      |
| Balistidae | Balistidae            | BAL-017       | 2016 | Inside                                       | 10                    | No                  | 0          | NA         | NA                                         | NA                      |
| Balistidae | Balistidae            | BAL-018       | 2017 | Inside                                       | 6                     | No                  | 0          | NA         | NA                                         | NA                      |
| Balistidae | Balistidae            | BAL-019       | 2017 | Inside                                       | 8                     | No                  | 0          | NA         | NA                                         | NA                      |
| Balistidae | Balistidae            | BAL-020       | 2017 | Inside                                       | 9                     | No                  | 0          | NA         | NA                                         | NA                      |
| Balistidae | Balistidae            | BAL-021       | 2017 | Inside                                       | 12                    | No                  | 0          | NA         | NA                                         | NA                      |
| Balistidae | Balistidae            | BAL-022       | 2017 | Inside                                       | 7                     | No                  | 0          | NA         | NA                                         | NA                      |
| Balistidae | Balistidae            | BAL-023       | 2017 | Inside                                       | 7                     | No                  | 0          | NA         | NA                                         | NA                      |
| Balistidae | Balistidae            | BAL-024       | 2018 | Inside                                       | 7                     | No                  | 0          | NA         | NA                                         | NA                      |
| Balistidae | Balistidae            | BAL-025       | 2018 | Inside                                       | 15                    | No                  | 0          | NA         | NA                                         | NA                      |
| Balistidae | Balistidae            | BAL-026       | 2018 | Inside                                       | 6                     | No                  | 0          | NA         | NA                                         | NA                      |
| Balistidae | Balistidae            | BAL-027       | 2018 | Inside                                       | 10                    | No                  | 0          | NA         | NA                                         | NA                      |
| Balistidae | Balistidae            | BAL-028       | 2016 | Inside                                       | 9                     | No                  | 0          | NA         | NA                                         | NA                      |
| Balistidae | Balistidae            | BAL-029       | 2016 | Inside                                       | 6                     | No                  | 0          | NA         | NA                                         | NA                      |
| Balistidae | Balistidae            | BAL-030       | 2017 | Inside                                       | 8                     | No                  | 0          | NA         | NA                                         | NA                      |
| Balistidae | Balistidae            | BAL-031       | 2017 | Inside                                       | 9                     | No                  | 0          | NA         | NA                                         | NA                      |
| Balistidae | Balistidae            | BAL-032       | 2017 | Inside                                       | 12                    | No                  | 0          | NA         | NA                                         | NA                      |
| Balistidae | Balistidae            | BAL-033       | 2017 | Inside                                       | 12                    | No                  | 0          | NA         | NA                                         | NA                      |
| Balistidae | Balistidae            | BAL-034       | 2017 | Inside                                       | 8                     | No                  | 0          | NA         | NA                                         | NA                      |
| Balistidae | Canthidermis maculata | BAL-035       | 2018 | Inside                                       | 11                    | Yes                 | 1          | fiber      | blue                                       | anthropogenic cellulose |
| Balistidae | Balistidae            | BAL-036       | 2018 | Inside                                       | 7                     | No                  | 0          | NA         | NA                                         | NA                      |
| Balistidae | Balistidae            | BAL-037       | 2018 | Inside                                       | 12                    | No                  | 0          | NA         | NA                                         | NA                      |
| Balistidae | Balistidae            | BAL-038       | 2016 | Inside                                       | 7                     | No                  | 0          | NA         | NA                                         | NA                      |
| Balistidae | Balistidae            | BAL-039       | 2017 | Inside                                       | 7                     | No                  | 0          | NA         | NA                                         | NA                      |
| Balistidae | Balistidae            | BAL-040       | 2017 | Inside                                       | 9                     | No                  | 0          | NA         | NA                                         | NA                      |
| Balistidae | Balistidae            | BAL-041       | 2017 | Inside                                       | 14                    | No                  | 0          | NA         | NA                                         | NA                      |
| Balistidae | Canthidermis maculata | BAL-042       | 2017 | Inside                                       | 9                     | Yes                 | 1          | fiber      | translucent                                | nylon 6                 |
| Balistidae | Balistidae            | BAL-043       | 2017 | Inside                                       | 7                     | No                  | 0          | NA         | NA                                         | NA                      |
| Balistidae | Balistidae            | BAL-044       | 2018 | Inside                                       | 10                    | No                  | 0          | NA         | NA                                         | NA                      |
| Balistidae | Balistidae            | BAL-045       | 2018 | Inside                                       | 8                     | No                  | 0          | NA         | NA                                         | NA                      |
| Balistidae | Balistidae            | BAL-046       | 2018 | Inside                                       | 11                    | No                  | 0          | NA         | NA                                         | NA                      |
| Balistidae | Balistidae            | BAL-047       | 2016 | Inside                                       | 6                     | No                  | 0          | NA         | NA                                         | NA                      |
| Balistidae | Balistidae            | BAL-048       | 2017 | Inside                                       | 7                     | No                  | 0          | NA         | NA                                         | NA                      |
| Balistidae | Balistidae            | BAL-049       | 2017 | Inside                                       | 8                     | No                  | 0          | NA         | NA                                         | NA                      |
| Balistidae | Balistidae            | BAL-050       | 2017 | Inside                                       | 13                    | No                  | 0          | NA         | NA                                         | NA                      |

|            |                       |         |      |         |    |     |   |           |             |                         |
|------------|-----------------------|---------|------|---------|----|-----|---|-----------|-------------|-------------------------|
| Balistidae | Canthidermis maculata | BAL-051 | 2005 | Outside | 18 | Yes | 2 | microbead | yellow      | unknown material        |
| Balistidae | Balistidae            | BAL-052 | 2011 | Outside | 11 | No  | 0 | NA        | NA          | NA                      |
| Balistidae | Canthidermis maculata | BAL-053 | 2011 | Outside | 12 | Yes | 1 | fiber     | translucent | anthropogenic cellulose |
| Balistidae | Balistidae            | BAL-054 | 2011 | Outside | 11 | No  | 0 | NA        | NA          | NA                      |
| Balistidae | Balistidae            | BAL-055 | 2011 | Outside | 11 | No  | 0 | NA        | NA          | NA                      |
| Balistidae | Balistidae            | BAL-056 | 2011 | Outside | 12 | No  | 0 | NA        | NA          | NA                      |
| Balistidae | Canthidermis maculata | BAL-057 | 2011 | Outside | 12 | Yes | 1 | fiber     | blue        | not analyzed            |
| Balistidae | Balistidae            | BAL-058 | 2011 | Outside | 11 | No  | 0 | NA        | NA          | NA                      |
| Balistidae | Balistidae            | BAL-059 | 2011 | Outside | 11 | No  | 0 | NA        | NA          | NA                      |
| Balistidae | Balistidae            | BAL-060 | 2011 | Outside | 10 | No  | 0 | NA        | NA          | NA                      |
| Balistidae | Balistidae            | BAL-061 | 2011 | Outside | 10 | No  | 0 | NA        | NA          | NA                      |
| Balistidae | Balistidae            | BAL-062 | 2011 | Outside | 10 | No  | 0 | NA        | NA          | NA                      |
| Balistidae | Balistidae            | BAL-063 | 2011 | Outside | 9  | No  | 0 | NA        | NA          | NA                      |
| Balistidae | Balistidae            | BAL-064 | 2006 | Outside | 10 | No  | 0 | NA        | NA          | NA                      |
| Balistidae | Balistidae            | BAL-065 | 2011 | Outside | 10 | No  | 0 | NA        | NA          | NA                      |
| Balistidae | Balistidae            | BAL-066 | 2011 | Outside | 10 | No  | 0 | NA        | NA          | NA                      |
| Balistidae | Balistidae            | BAL-067 | 2011 | Outside | 10 | No  | 0 | NA        | NA          | NA                      |
| Balistidae | Balistidae            | BAL-068 | 2011 | Outside | 9  | No  | 0 | NA        | NA          | NA                      |
| Balistidae | Balistidae            | BAL-069 | 2011 | Outside | 10 | No  | 0 | NA        | NA          | NA                      |
| Balistidae | Balistidae            | BAL-070 | 2011 | Outside | 10 | No  | 0 | NA        | NA          | NA                      |
| Balistidae | Balistidae            | BAL-071 | 2011 | Outside | 9  | No  | 0 | NA        | NA          | NA                      |
| Balistidae | Balistidae            | BAL-072 | 2011 | Outside | 9  | No  | 0 | NA        | NA          | NA                      |
| Balistidae | Balistidae            | BAL-073 | 2011 | Outside | 9  | No  | 0 | NA        | NA          | NA                      |
| Balistidae | Balistidae            | BAL-074 | 2011 | Outside | 9  | No  | 0 | NA        | NA          | NA                      |
| Balistidae | Balistidae            | BAL-075 | 2011 | Outside | 9  | No  | 0 | NA        | NA          | NA                      |
| Balistidae | Balistidae            | BAL-076 | 2011 | Outside | 9  | No  | 0 | NA        | NA          | NA                      |
| Balistidae | Balistidae            | BAL-077 | 2011 | Outside | 9  | No  | 0 | NA        | NA          | NA                      |
| Balistidae | Balistidae            | BAL-078 | 2011 | Outside | 9  | No  | 0 | NA        | NA          | NA                      |
| Balistidae | Balistidae            | BAL-079 | 2011 | Outside | 9  | No  | 0 | NA        | NA          | NA                      |
| Balistidae | Balistidae            | BAL-080 | 2011 | Outside | 8  | No  | 0 | NA        | NA          | NA                      |
| Balistidae | Balistidae            | BAL-081 | 2011 | Outside | 9  | No  | 0 | NA        | NA          | NA                      |
| Balistidae | Balistidae            | BAL-082 | 2011 | Outside | 9  | No  | 0 | NA        | NA          | NA                      |
| Balistidae | Balistidae            | BAL-083 | 2011 | Outside | 8  | No  | 0 | NA        | NA          | NA                      |
| Carangidae | Scomberoides lysan    | SCO-001 | 2018 | Inside  | 27 | No  | 0 | NA        | NA          | NA                      |
| Carangidae | Scomberoides lysan    | SCO-002 | 2011 | Inside  | 20 | No  | 0 | NA        | NA          | NA                      |
| Carangidae | Scomberoides lysan    | SCO-003 | 2011 | Inside  | 25 | No  | 0 | NA        | NA          | NA                      |
| Carangidae | Scomberoides lysan    | SCO-004 | 2011 | Inside  | 23 | No  | 0 | NA        | NA          | NA                      |
| Carangidae | Scomberoides lysan    | SCO-005 | 2011 | Inside  | 21 | No  | 0 | NA        | NA          | NA                      |
| Carangidae | Scomberoides lysan    | SCO-006 | 2016 | Inside  | 20 | No  | 0 | NA        | NA          | NA                      |
| Carangidae | Scomberoides lysan    | SCO-007 | 2016 | Inside  | 11 | No  | 0 | NA        | NA          | NA                      |
| Carangidae | Scomberoides lysan    | SCO-008 | 2011 | Inside  | 21 | No  | 0 | NA        | NA          | NA                      |
| Carangidae | Scomberoides lysan    | SCO-009 | 2011 | Inside  | 22 | No  | 0 | NA        | NA          | NA                      |
| Carangidae | Scomberoides lysan    | SCO-010 | 2011 | Inside  | 20 | No  | 0 | NA        | NA          | NA                      |
| Carangidae | Scomberoides lysan    | SCO-011 | 2017 | Outside | 17 | No  | 0 | NA        | NA          | NA                      |
| Carangidae | Scomberoides lysan    | SCO-012 | 2017 | Inside  | 16 | No  | 0 | NA        | NA          | NA                      |
| Carangidae | Scomberoides lysan    | SCO-013 | 2011 | Inside  | 19 | No  | 0 | NA        | NA          | NA                      |
| Carangidae | Scomberoides lysan    | SCO-014 | 2011 | Inside  | 22 | No  | 0 | NA        | NA          | NA                      |
| Carangidae | Scomberoides lysan    | SCO-015 | 2011 | Inside  | 23 | No  | 0 | NA        | NA          | NA                      |
| Carangidae | Scomberoides lysan    | SCO-016 | 2011 | Inside  | 17 | No  | 0 | NA        | NA          | NA                      |
| Carangidae | Scomberoides lysan    | SCO-017 | 2011 | Inside  | 17 | No  | 0 | NA        | NA          | NA                      |
| Carangidae | Scomberoides lysan    | SCO-018 | 2011 | Inside  | 15 | No  | 0 | NA        | NA          | NA                      |
| Carangidae | Scomberoides lysan    | SCO-019 | 2011 | Inside  | 15 | No  | 0 | NA        | NA          | NA                      |
| Carangidae | Scomberoides lysan    | SCO-020 | 2011 | Outside | 19 | No  | 0 | NA        | NA          | NA                      |

|            |                    |         |      |         |    |     |   |       |      |              |
|------------|--------------------|---------|------|---------|----|-----|---|-------|------|--------------|
| Carangidae | Scomberoides lysan | SCO-021 | 2011 | Outside | 18 | No  | 0 | NA    | NA   | NA           |
| Carangidae | Scomberoides lysan | SCO-022 | 2011 | Inside  | 19 | No  | 0 | NA    | NA   | NA           |
| Carangidae | Scomberoides lysan | SCO-023 | 2011 | Inside  | 20 | No  | 0 | NA    | NA   | NA           |
| Carangidae | Scomberoides lysan | SCO-024 | 2016 | Inside  | 25 | No  | 0 | NA    | NA   | NA           |
| Carangidae | Scomberoides lysan | SCO-025 | 2016 | Inside  | 23 | No  | 0 | NA    | NA   | NA           |
| Carangidae | Scomberoides lysan | SCO-026 | 2016 | Inside  | 28 | No  | 0 | NA    | NA   | NA           |
| Carangidae | Scomberoides lysan | SCO-027 | 2011 | Outside | 20 | No  | 0 | NA    | NA   | NA           |
| Carangidae | Scomberoides lysan | SCO-028 | 2011 | Outside | 22 | No  | 0 | NA    | NA   | NA           |
| Carangidae | Scomberoides lysan | SCO-029 | 2011 | Outside | 18 | No  | 0 | NA    | NA   | NA           |
| Carangidae | Scomberoides lysan | SCO-030 | 2016 | Inside  | 25 | No  | 0 | NA    | NA   | NA           |
| Carangidae | Scomberoides lysan | SCO-031 | 2016 | Inside  | 18 | No  | 0 | NA    | NA   | NA           |
| Carangidae | Scomberoides lysan | SCO-032 | 2016 | Inside  | 19 | No  | 0 | NA    | NA   | NA           |
| Carangidae | Scomberoides lysan | SCO-033 | 2016 | Inside  | 17 | No  | 0 | NA    | NA   | NA           |
| Carangidae | Scomberoides lysan | SCO-034 | 2006 | Outside | 16 | No  | 0 | NA    | NA   | NA           |
| Carangidae | Scomberoides lysan | SCO-035 | 2011 | Outside | 18 | No  | 0 | NA    | NA   | NA           |
| Carangidae | Scomberoides lysan | SCO-036 | 2011 | Inside  | 17 | No  | 0 | NA    | NA   | NA           |
| Carangidae | Scomberoides lysan | SCO-037 | 2011 | Inside  | 15 | No  | 0 | NA    | NA   | NA           |
| Carangidae | Scomberoides lysan | SCO-038 | 2011 | Inside  | 15 | No  | 0 | NA    | NA   | NA           |
| Carangidae | Scomberoides lysan | SCO-039 | 2011 | Inside  | 17 | No  | 0 | NA    | NA   | NA           |
| Carangidae | Scomberoides lysan | SCO-040 | 2011 | Inside  | 16 | No  | 0 | NA    | NA   | NA           |
| Carangidae | Scomberoides lysan | SCO-041 | 2011 | Inside  | 16 | No  | 0 | NA    | NA   | NA           |
| Carangidae | Scomberoides lysan | SCO-042 | 2011 | Inside  | 15 | No  | 0 | NA    | NA   | NA           |
| Carangidae | Scomberoides lysan | SCO-043 | 2011 | Inside  | 15 | Yes | 1 | fiber | blue | not analyzed |
| Carangidae | Scomberoides lysan | SCO-045 | 2017 | Inside  | 15 | No  | 0 | NA    | NA   | NA           |
| Carangidae | Scomberoides lysan | SCO-046 | 2016 | Inside  | 22 | No  | 0 | NA    | NA   | NA           |
| Carangidae | Scomberoides lysan | SCO-047 | 2016 | Inside  | 15 | No  | 0 | NA    | NA   | NA           |
| Carangidae | Scomberoides lysan | SCO-048 | 2011 | Outside | 22 | No  | 0 | NA    | NA   | NA           |
| Carangidae | Scomberoides lysan | SCO-049 | 2011 | Inside  | 14 | No  | 0 | NA    | NA   | NA           |
| Carangidae | Scomberoides lysan | SCO-050 | 2017 | Inside  | 15 | No  | 0 | NA    | NA   | NA           |
| Carangidae | Scomberoides lysan | SCO-45  | 2011 | Outside | 14 | No  | 0 | NA    | NA   | NA           |
| Carangidae | Scomberoides lysan | SCO-46  | 2011 | Outside | 14 | No  | 0 | NA    | NA   | NA           |
| Carangidae | Scomberoides lysan | SCO-47  | 2011 | Outside | 11 | No  | 0 | NA    | NA   | NA           |
| Carangidae | Scomberoides lysan | SCO-48  | 2011 | Outside | 13 | No  | 0 | NA    | NA   | NA           |
| Carangidae | Scomberoides lysan | SCO-49  | 2011 | Outside | 14 | No  | 0 | NA    | NA   | NA           |
| Carangidae | Scomberoides lysan | SCO-50  | 2011 | Outside | 17 | No  | 0 | NA    | NA   | NA           |
| Carangidae | Scomberoides lysan | SCO-51  | 2011 | Outside | 11 | No  | 0 | NA    | NA   | NA           |
| Carangidae | Scomberoides lysan | SCO-52  | 2011 | Outside | 13 | No  | 0 | NA    | NA   | NA           |
| Carangidae | Scomberoides lysan | SCO-53  | 2011 | Outside | 12 | No  | 0 | NA    | NA   | NA           |
| Carangidae | Scomberoides lysan | SCO-55  | 2018 | Inside  | 15 | No  | 0 | NA    | NA   | NA           |
| Carangidae | Scomberoides lysan | SCO-56  | 2018 | Inside  | 13 | No  | 0 | NA    | NA   | NA           |
| Carangidae | Scomberoides lysan | SCO-57  | 2018 | Inside  | 14 | No  | 0 | NA    | NA   | NA           |
| Carangidae | Scomberoides lysan | SCO-58  | 2018 | Inside  | 13 | No  | 0 | NA    | NA   | NA           |
| Carangidae | Scomberoides lysan | SCO-59  | 2018 | Inside  | 12 | No  | 0 | NA    | NA   | NA           |
| Carangidae | Scomberoides lysan | SCO-60  | 2011 | Outside | 14 | No  | 0 | NA    | NA   | NA           |
| Carangidae | Scomberoides lysan | SCO-61  | 2011 | Outside | 13 | No  | 0 | NA    | NA   | NA           |
| Carangidae | Scomberoides lysan | SCO-62  | 2011 | Outside | 10 | No  | 0 | NA    | NA   | NA           |
| Carangidae | Scomberoides lysan | SCO-63  | 2011 | Outside | 17 | No  | 0 | NA    | NA   | NA           |
| Carangidae | Scomberoides lysan | SCO-64  | 2011 | Outside | 16 | No  | 0 | NA    | NA   | NA           |
| Carangidae | Scomberoides lysan | SCO-65  | 2011 | Outside | 14 | No  | 0 | NA    | NA   | NA           |
| Carangidae | Scomberoides lysan | SCO-66  | 2011 | Outside | 12 | No  | 0 | NA    | NA   | NA           |
| Carangidae | Scomberoides lysan | SCO-67  | 2011 | Outside | 12 | No  | 0 | NA    | NA   | NA           |
| Carangidae | Scomberoides lysan | SCO-68  | 2011 | Outside | 13 | No  | 0 | NA    | NA   | NA           |
| Carangidae | Scomberoides lysan | SCO-69  | 2011 | Outside | 13 | No  | 0 | NA    | NA   | NA           |

|            |                  |         |      |         |    |     |   |       |     |                         |
|------------|------------------|---------|------|---------|----|-----|---|-------|-----|-------------------------|
| Carangidae | Seriola dumerili | SER-002 | 2009 | Inside  | 35 | No  | 0 | NA    | NA  | NA                      |
| Carangidae | Seriola dumerili | SER-003 | 2009 | Inside  | 35 | No  | 0 | NA    | NA  | NA                      |
| Carangidae | Seriola dumerili | SER-004 | 2009 | Inside  | 31 | No  | 0 | NA    | NA  | NA                      |
| Carangidae | Seriola dumerili | SER-005 | 2009 | Inside  | 30 | No  | 0 | NA    | NA  | NA                      |
| Carangidae | Seriola dumerili | SER-006 | 2018 | Inside  | 30 | No  | 0 | NA    | NA  | NA                      |
| Carangidae | Seriola dumerili | SER-007 | 2018 | Inside  | 26 | No  | 0 | NA    | NA  | NA                      |
| Carangidae | Seriola dumerili | SER-008 | 2018 | Inside  | 25 | No  | 0 | NA    | NA  | NA                      |
| Carangidae | Seriola dumerili | SER-009 | 2018 | Inside  | 20 | No  | 0 | NA    | NA  | NA                      |
| Carangidae | Seriola dumerili | SER-010 | 2011 | Inside  | 28 | No  | 0 | NA    | NA  | NA                      |
| Carangidae | Seriola dumerili | SER-011 | 2018 | Inside  | 20 | Yes | 1 | fiber | red | anthropogenic cellulose |
| Carangidae | Seriola dumerili | SER-012 | 2018 | Inside  | 16 | No  | 0 | NA    | NA  | NA                      |
| Carangidae | Seriola dumerili | SER-013 | 2018 | Inside  | 26 | No  | 0 | NA    | NA  | NA                      |
| Carangidae | Seriola dumerili | SER-014 | 2018 | Inside  | 20 | No  | 0 | NA    | NA  | NA                      |
| Carangidae | Seriola dumerili | SER-015 | 2009 | Inside  | 30 | No  | 0 | NA    | NA  | NA                      |
| Carangidae | Seriola dumerili | SER-016 | 2009 | Inside  | 35 | No  | 0 | NA    | NA  | NA                      |
| Carangidae | Seriola dumerili | SER-017 | 2009 | Inside  | 25 | No  | 0 | NA    | NA  | NA                      |
| Carangidae | Seriola dumerili | SER-018 | 2009 | Inside  | 22 | No  | 0 | NA    | NA  | NA                      |
| Carangidae | Seriola dumerili | SER-019 | 2011 | Inside  | 25 | No  | 0 | NA    | NA  | NA                      |
| Carangidae | Seriola dumerili | SER-020 | 2011 | Inside  | 23 | No  | 0 | NA    | NA  | NA                      |
| Carangidae | Seriola dumerili | SER-021 | 2011 | Inside  | 20 | No  | 0 | NA    | NA  | NA                      |
| Carangidae | Seriola dumerili | SER-022 | 2011 | Inside  | 19 | No  | 0 | NA    | NA  | NA                      |
| Carangidae | Seriola dumerili | SER-023 | 2009 | Outside | 20 | No  | 0 | NA    | NA  | NA                      |
| Carangidae | Seriola dumerili | SER-024 | 2009 | Inside  | 26 | No  | 0 | NA    | NA  | NA                      |
| Carangidae | Seriola dumerili | SER-025 | 2009 | Inside  | 25 | No  | 0 | NA    | NA  | NA                      |
| Carangidae | Seriola dumerili | SER-026 | 2009 | Inside  | 23 | No  | 0 | NA    | NA  | NA                      |
| Carangidae | Seriola dumerili | SER-027 | 2009 | Inside  | 17 | No  | 0 | NA    | NA  | NA                      |
| Carangidae | Seriola dumerili | SER-028 | 2011 | Outside | 18 | No  | 0 | NA    | NA  | NA                      |
| Carangidae | Seriola dumerili | SER-029 | 2005 | Outside | 15 | No  | 0 | NA    | NA  | NA                      |
| Carangidae | Seriola dumerili | SER-030 | 2011 | Outside | 18 | No  | 0 | NA    | NA  | NA                      |
| Carangidae | Seriola dumerili | SER-031 | 2011 | Outside | 15 | No  | 0 | NA    | NA  | NA                      |
| Carangidae | Seriola dumerili | SER-032 | 2011 | Outside | 15 | No  | 0 | NA    | NA  | NA                      |
| Carangidae | Seriola dumerili | SER-033 | 2011 | Outside | 17 | No  | 0 | NA    | NA  | NA                      |
| Carangidae | Seriola dumerili | SER-034 | 2005 | Inside  | 25 | No  | 0 | NA    | NA  | NA                      |
| Carangidae | Seriola dumerili | SER-035 | 2005 | Inside  | 18 | No  | 0 | NA    | NA  | NA                      |
| Carangidae | Seriola dumerili | SER-036 | 2011 | Outside | 20 | No  | 0 | NA    | NA  | NA                      |
| Carangidae | Seriola dumerili | SER-037 | 2017 | Inside  | 30 | No  | 0 | NA    | NA  | NA                      |
| Carangidae | Seriola dumerili | SER-038 | 2017 | Inside  | 33 | No  | 0 | NA    | NA  | NA                      |
| Carangidae | Seriola dumerili | SER-039 | 2017 | Inside  | 32 | No  | 0 | NA    | NA  | NA                      |
| Carangidae | Seriola dumerili | SER-040 | 2017 | Inside  | 31 | No  | 0 | NA    | NA  | NA                      |
| Carangidae | Seriola dumerili | SER-045 | 2006 | Outside | 21 | No  | 0 | NA    | NA  | NA                      |
| Carangidae | Seriola dumerili | SER-046 | 2006 | Outside | 20 | No  | 0 | NA    | NA  | NA                      |
| Carangidae | Seriola dumerili | SER-047 | 2006 | Outside | 18 | No  | 0 | NA    | NA  | NA                      |
| Carangidae | Seriola dumerili | SER-048 | 2006 | Outside | 15 | No  | 0 | NA    | NA  | NA                      |
| Carangidae | Seriola dumerili | SER-049 | 2006 | Outside | 16 | No  | 0 | NA    | NA  | NA                      |
| Carangidae | Seriola dumerili | SER-050 | 2006 | Outside | 14 | No  | 0 | NA    | NA  | NA                      |
| Carangidae | Seriola dumerili | SER-051 | 2006 | Outside | 14 | No  | 0 | NA    | NA  | NA                      |
| Carangidae | Seriola dumerili | SER-052 | 2011 | Outside | 18 | No  | 0 | NA    | NA  | NA                      |
| Carangidae | Seriola dumerili | SER-053 | 2011 | Outside | 14 | No  | 0 | NA    | NA  | NA                      |
| Carangidae | Seriola dumerili | SER-054 | 2011 | Outside | 15 | No  | 0 | NA    | NA  | NA                      |
| Carangidae | Seriola dumerili | SER-055 | 2011 | Outside | 24 | No  | 0 | NA    | NA  | NA                      |
| Carangidae | Seriola dumerili | SER-056 | 2011 | Outside | 20 | No  | 0 | NA    | NA  | NA                      |
| Carangidae | Seriola dumerili | SER-057 | 2011 | Outside | 19 | No  | 0 | NA    | NA  | NA                      |
| Carangidae | Seriola dumerili | SER-058 | 2011 | Outside | 19 | No  | 0 | NA    | NA  | NA                      |



|               |                  |         |      |         |    |     |   |       |             |              |
|---------------|------------------|---------|------|---------|----|-----|---|-------|-------------|--------------|
| Carangidae    | Seriola dumerili | SER-059 | 2011 | Outside | 18 | No  | 0 | NA    | NA          | NA           |
| Carangidae    | Seriola dumerili | SER-060 | 2011 | Outside | 19 | No  | 0 | NA    | NA          | NA           |
| Carangidae    | Seriola dumerili | SER-061 | 2011 | Outside | 17 | No  | 0 | NA    | NA          | NA           |
| Carangidae    | Seriola dumerili | SER-062 | 2011 | Outside | 20 | No  | 0 | NA    | NA          | NA           |
| Carangidae    | Seriola dumerili | SER-063 | 2011 | Outside | 18 | No  | 0 | NA    | NA          | NA           |
| Carangidae    | Seriola dumerili | SER-064 | 2011 | Outside | 17 | No  | 0 | NA    | NA          | NA           |
| Carangidae    | Seriola dumerili | SER-65  | 2018 | Inside  | 16 | No  | 0 | NA    | NA          | NA           |
| Carangidae    | Seriola dumerili | SER-66  | 2018 | Inside  | 11 | No  | 0 | NA    | NA          | NA           |
| Carangidae    | Seriola dumerili | SER-67  | 2018 | Inside  | 11 | No  | 0 | NA    | NA          | NA           |
| Carangidae    | Seriola dumerili | SER-68  | 2018 | Inside  | 11 | Yes | 1 | fiber | translucent | not analyzed |
| Coryphaenidae | C. equicellis    | COR-001 | 2011 | Inside  | 47 | No  | 0 | NA    | NA          | NA           |
| Coryphaenidae | C. equicellis    | COR-002 | 2011 | Outside | 43 | No  | 0 | NA    | NA          | NA           |
| Coryphaenidae | C. hippurus      | COR-003 | 2011 | Inside  | 45 | No  | 0 | NA    | NA          | NA           |
| Coryphaenidae | C. equicellis    | COR-004 | 2011 | Outside | 30 | No  | 0 | NA    | NA          | NA           |
| Coryphaenidae | C. hippurus      | COR-005 | 2017 | Inside  | 22 | No  | 0 | NA    | NA          | NA           |
| Coryphaenidae | C. hippurus      | COR-006 | 2017 | Inside  | 32 | No  | 0 | NA    | NA          | NA           |
| Coryphaenidae | C. equicellis    | COR-007 | 2011 | Inside  | 27 | No  | 0 | NA    | NA          | NA           |
| Coryphaenidae | C. hippurus      | COR-008 | 2011 | Inside  | 34 | No  | 0 | NA    | NA          | NA           |
| Coryphaenidae | C. equicellis    | COR-009 | 2011 | Outside | 36 | No  | 0 | NA    | NA          | NA           |
| Coryphaenidae | C. hippurus      | COR-010 | 2011 | Inside  | 30 | No  | 0 | NA    | NA          | NA           |
| Coryphaenidae | C. hippurus      | COR-011 | 2018 | Inside  | 51 | No  | 0 | NA    | NA          | NA           |
| Coryphaenidae | C. hippurus      | COR-012 | 2009 | Inside  | 22 | No  | 0 | NA    | NA          | NA           |
| Coryphaenidae | C. hippurus      | COR-013 | 2011 | Outside | 26 | No  | 0 | NA    | NA          | NA           |
| Coryphaenidae | C. hippurus      | COR-014 | 2011 | Outside | 20 | No  | 0 | NA    | NA          | NA           |
| Coryphaenidae | C. equicellis    | COR-015 | 2005 | Outside | 23 | No  | 0 | NA    | NA          | NA           |
| Coryphaenidae | C. equicellis    | COR-016 | 2011 | Inside  | 26 | No  | 0 | NA    | NA          | NA           |
| Coryphaenidae | C. equicellis    | COR-017 | 2017 | Inside  | 19 | No  | 0 | NA    | NA          | NA           |
| Coryphaenidae | C. equicellis    | COR-018 | 2011 | Inside  | 24 | No  | 0 | NA    | NA          | NA           |
| Coryphaenidae | C. equicellis    | COR-019 | 2011 | Inside  | 26 | No  | 0 | NA    | NA          | NA           |
| Coryphaenidae | C. equicellis    | COR-020 | 2017 | Inside  | 24 | No  | 0 | NA    | NA          | NA           |
| Coryphaenidae | C. equicellis    | COR-021 | 2017 | Inside  | 22 | No  | 0 | NA    | NA          | NA           |
| Coryphaenidae | C. equicellis    | COR-022 | 2017 | Inside  | 26 | No  | 0 | NA    | NA          | NA           |
| Coryphaenidae | C. hippurus      | COR-023 | 2017 | Inside  | 19 | No  | 0 | NA    | NA          | NA           |
| Coryphaenidae | C. equicellis    | COR-024 | 2011 | Inside  | 23 | No  | 0 | NA    | NA          | NA           |
| Coryphaenidae | C. equicellis    | COR-025 | 2011 | Inside  | 23 | No  | 0 | NA    | NA          | NA           |
| Coryphaenidae | C. hippurus      | COR-026 | 2006 | Inside  | 19 | No  | 0 | NA    | NA          | NA           |
| Coryphaenidae | C. hippurus      | COR-027 | 2006 | Inside  | 23 | No  | 0 | NA    | NA          | NA           |
| Coryphaenidae | C. hippurus      | COR-028 | 2006 | Inside  | 23 | No  | 0 | NA    | NA          | NA           |
| Coryphaenidae | C. equicellis    | COR-029 | 2005 | Inside  | 22 | No  | 0 | NA    | NA          | NA           |
| Coryphaenidae | C. hippurus      | COR-030 | 2009 | Inside  | 18 | No  | 0 | NA    | NA          | NA           |
| Coryphaenidae | C. hippurus      | COR-031 | 2011 | Outside | 20 | No  | 0 | NA    | NA          | NA           |
| Coryphaenidae | C. equicellis    | COR-032 | 2017 | Inside  | 16 | No  | 0 | NA    | NA          | NA           |
| Coryphaenidae | C. equicellis    | COR-033 | 2017 | Inside  | 17 | No  | 0 | NA    | NA          | NA           |
| Coryphaenidae | C. equicellis    | COR-034 | 2017 | Inside  | 24 | No  | 0 | NA    | NA          | NA           |
| Coryphaenidae | C. equicellis    | COR-035 | 2016 | Inside  | 21 | No  | 0 | NA    | NA          | NA           |
| Coryphaenidae | C. equicellis    | COR-036 | 2009 | Outside | 24 | No  | 0 | NA    | NA          | NA           |
| Coryphaenidae | C. equicellis    | COR-037 | 2011 | Outside | 29 | No  | 0 | NA    | NA          | NA           |
| Coryphaenidae | C. equicellis    | COR-038 | 2011 | Outside | 30 | No  | 0 | NA    | NA          | NA           |
| Coryphaenidae | C. hippurus      | COR-039 | 2011 | Outside | 18 | No  | 0 | NA    | NA          | NA           |
| Coryphaenidae | C. equicellis    | COR-040 | 2017 | Inside  | 19 | No  | 0 | NA    | NA          | NA           |
| Coryphaenidae | C. hippurus      | COR-041 | 2006 | Inside  | 24 | No  | 0 | NA    | NA          | NA           |
| Coryphaenidae | C. hippurus      | COR-042 | 2006 | Inside  | 22 | No  | 0 | NA    | NA          | NA           |
| Coryphaenidae | C. equicellis    | COR-043 | 2011 | Inside  | 19 | No  | 0 | NA    | NA          | NA           |

|               |                           |         |      |         |    |     |   |               |             |              |
|---------------|---------------------------|---------|------|---------|----|-----|---|---------------|-------------|--------------|
| Coryphaenidae | C. equicellis             | COR-044 | 2011 | Inside  | 19 | No  | 0 | NA            | NA          | NA           |
| Coryphaenidae | C. hippurus               | COR-045 | 2016 | Inside  | 19 | No  | 0 | NA            | NA          | NA           |
| Coryphaenidae | C. equicellis             | COR-046 | 2017 | Inside  | 18 | No  | 0 | NA            | NA          | NA           |
| Coryphaenidae | C. equicellis             | COR-047 | 2017 | Inside  | 21 | No  | 0 | NA            | NA          | NA           |
| Coryphaenidae | C. equicellis             | COR-048 | 2017 | Inside  | 17 | No  | 0 | NA            | NA          | NA           |
| Coryphaenidae | C. equicellis             | COR-049 | 2005 | Inside  | 16 | No  | 0 | NA            | NA          | NA           |
| Coryphaenidae | C. equicellis             | COR-050 | 2011 | Inside  | 23 | No  | 0 | NA            | NA          | NA           |
| Coryphaenidae | Coryphaena hippurus       | COR-51  | 2011 | Outside | 15 | No  | 0 | NA            | NA          | NA           |
| Coryphaenidae | Coryphaena hippurus       | COR-52  | 2011 | Outside | 15 | No  | 0 | NA            | NA          | NA           |
| Coryphaenidae | Coryphaena equiselis      | COR-53  | 2011 | Outside | 20 | No  | 0 | NA            | NA          | NA           |
| Coryphaenidae | Coryphaena equiselis      | COR-54  | 2011 | Outside | 22 | No  | 0 | NA            | NA          | NA           |
| Coryphaenidae | Coryphaena equiselis      | COR-55  | 2011 | Outside | 22 | No  | 0 | NA            | NA          | NA           |
| Coryphaenidae | Coryphaena equiselis      | COR-56  | 2011 | Outside | 21 | No  | 0 | NA            | NA          | NA           |
| Coryphaenidae | Coryphaena equiselis      | COR-57  | 2011 | Outside | 22 | No  | 0 | NA            | NA          | NA           |
| Coryphaenidae | Coryphaena equiselis      | COR-58  | 2011 | Outside | 19 | No  | 0 | NA            | NA          | NA           |
| Coryphaenidae | Coryphaena equiselis      | COR-59  | 2011 | Outside | 20 | No  | 0 | NA            | NA          | NA           |
| Coryphaenidae | Coryphaena hippurus       | COR-60  | 2018 | Outside | 13 | No  | 0 | NA            | NA          | NA           |
| Coryphaenidae | Coryphaena hippurus       | COR-61  | 2018 | Outside | 13 | No  | 0 | NA            | NA          | NA           |
| Coryphaenidae | Coryphaena equiselis      | COR-62  | 2011 | Outside | 21 | No  | 0 | NA            | NA          | NA           |
| Coryphaenidae | Coryphaena equiselis      | COR-63  | 2011 | Outside | 21 | Yes | 1 | fiber         | translucent | not analyzed |
| Coryphaenidae | Coryphaena hippurus       | COR-64  | 2011 | Outside | 13 | No  | 0 | NA            | NA          | NA           |
| Coryphaenidae | Coryphaena hippurus       | COR-65  | 2006 | Outside | 19 | No  | 0 | NA            | NA          | NA           |
| Coryphaenidae | Coryphaena hippurus       | COR-66  | 2006 | Outside | 15 | No  | 0 | NA            | NA          | NA           |
| Coryphaenidae | Coryphaena equiselis      | COR-67  | 2011 | Outside | 20 | No  | 0 | NA            | NA          | NA           |
| Coryphaenidae | Coryphaena equiselis      | COR-68  | 2011 | Outside | 19 | No  | 0 | NA            | NA          | NA           |
| Coryphaenidae | Coryphaena equiselis      | COR-69  | 2011 | Outside | 18 | No  | 0 | NA            | NA          | NA           |
| Coryphaenidae | Coryphaena equiselis      | COR-70  | 2011 | Outside | 17 | No  | 0 | NA            | NA          | NA           |
| Coryphaenidae | Coryphaena equiselis      | COR-71  | 2011 | Outside | 14 | No  | 0 | NA            | NA          | NA           |
| Coryphaenidae | Coryphaena equiselis      | COR-72  | 2011 | Outside | 16 | No  | 0 | NA            | NA          | NA           |
| Coryphaenidae | Coryphaena equiselis      | COR-73  | 2011 | Outside | 18 | No  | 0 | NA            | NA          | NA           |
| Coryphaenidae | Coryphaena equiselis      | COR-74  | 2011 | Outside | 15 | No  | 0 | NA            | NA          | NA           |
| Coryphaenidae | Coryphaena equiselis      | COR-75  | 2018 | Outside | 20 | No  | 0 | NA            | NA          | NA           |
| Coryphaenidae | Coryphaena hippurus       | COR-76  | 2011 | Outside | 13 | No  | 0 | NA            | NA          | NA           |
| Coryphaenidae | Coryphaena equiselis      | COR-77  | 2018 | Outside | 14 | No  | 0 | NA            | NA          | NA           |
| Exocoetidae   | Exocoetidae               | EXO-001 | 2017 | Inside  | 25 | No  | 0 | NA            | NA          | NA           |
| Exocoetidae   | Exocoetidae               | EXO-002 | 2011 | Inside  | 39 | No  | 0 | NA            | NA          | NA           |
| Exocoetidae   | Exocoetidae               | EXO-003 | 2017 | Inside  | 24 | No  | 0 | NA            | NA          | NA           |
| Exocoetidae   | Exocoetidae               | EXO-004 | 2017 | Inside  | 37 | No  | 0 | NA            | NA          | NA           |
| Exocoetidae   | Exocoetidae               | EXO-005 | 2017 | Inside  | 25 | No  | 0 | NA            | NA          | NA           |
| Exocoetidae   | Parexocoetus brachypterus | EXO-006 | 2017 | Inside  | 24 | Yes | 1 | fiber         | blue        | not analyzed |
| Exocoetidae   | Exocoetidae               | EXO-007 | 2017 | Inside  | 17 | No  | 0 | NA            | NA          | NA           |
| Exocoetidae   | Exocoetidae               | EXO-008 | 2017 | Inside  | 23 | No  | 0 | NA            | NA          | NA           |
| Exocoetidae   | Exocoetidae               | EXO-009 | 2017 | Inside  | 20 | No  | 0 | NA            | NA          | NA           |
| Exocoetidae   | Exocoetidae               | EXO-010 | 2017 | Inside  | 24 | No  | 0 | NA            | NA          | NA           |
| Exocoetidae   | Exocoetidae               | EXO-011 | 2017 | Inside  | 19 | No  | 0 | NA            | NA          | NA           |
| Exocoetidae   | Cheilopogon sp.           | EXO-012 | 2017 | Inside  | 10 | Yes | 1 | foam fragment | blue        | not analyzed |
| Exocoetidae   | Exocoetidae               | EXO-013 | 2011 | Outside | 23 | No  | 0 | NA            | NA          | NA           |

|             |                           |         |      |         |    |     |   |       |                 |                                                                                                                                                                                  |
|-------------|---------------------------|---------|------|---------|----|-----|---|-------|-----------------|----------------------------------------------------------------------------------------------------------------------------------------------------------------------------------|
| Exocoetidae | Parexocoetus brachypterus | EXO-014 | 2016 | Inside  | 16 | Yes | 3 | fiber | 2 blue, 1 black | BlueFiber#1: polyethylene terephthalate (blue pigmented); BlueFiber#2: anthropogenic cellulose (blue pigmented); BlackFiber#1: anthropogenic pigment on unknown material (black) |
| Exocoetidae | Exocoetidae               | EXO-015 | 2006 | Outside | 19 | No  | 0 | NA    | NA              | NA                                                                                                                                                                               |
| Exocoetidae | Exocoetidae               | EXO-016 | 2006 | Outside | 18 | No  | 0 | NA    | NA              | NA                                                                                                                                                                               |
| Exocoetidae | Cheilopogon furcatus      | EXO-017 | 2017 | Inside  | 19 | Yes | 1 | fiber | blue            | anthropogenic cellulose                                                                                                                                                          |
| Exocoetidae | Exocoetidae               | EXO-018 | 2017 | Inside  | 16 | No  | 0 | NA    | NA              | NA                                                                                                                                                                               |
| Exocoetidae | Exocoetidae               | EXO-019 | 2009 | Inside  | 13 | No  | 0 | NA    | NA              | NA                                                                                                                                                                               |
| Exocoetidae | Exocoetidae               | EXO-020 | 2017 | Inside  | 21 | No  | 0 | NA    | NA              | NA                                                                                                                                                                               |
| Exocoetidae | Exocoetidae               | EXO-021 | 2017 | Inside  | 19 | No  | 0 | NA    | NA              | NA                                                                                                                                                                               |
| Exocoetidae | Exocoetidae               | EXO-022 | 2017 | Inside  | 22 | No  | 0 | NA    | NA              | NA                                                                                                                                                                               |
| Exocoetidae | Exocoetidae               | EXO-023 | 2017 | Outside | 12 | No  | 0 | NA    | NA              | NA                                                                                                                                                                               |
| Exocoetidae | Exocoetidae               | EXO-024 | 2006 | Inside  | 15 | No  | 0 | NA    | NA              | NA                                                                                                                                                                               |
| Exocoetidae | Exocoetus sp.             | EXO-025 | 2006 | Inside  | 22 | Yes | 1 | fiber | blue            | anthropogenic cellulose                                                                                                                                                          |
| Exocoetidae | Cheilopogon sp.           | EXO-026 | 2017 | Inside  | 17 | Yes | 1 | fiber | translucent     | anthropogenic cellulose                                                                                                                                                          |
| Exocoetidae | Cheilopogon sp.           | EXO-027 | 2006 | Outside | 15 | Yes | 1 | fiber | blue            | not analyzed                                                                                                                                                                     |
| Exocoetidae | Exocoetidae               | EXO-028 | 2006 | Outside | 15 | No  | 0 | NA    | NA              | NA                                                                                                                                                                               |
| Exocoetidae | Exocoetidae               | EXO-029 | 2009 | Inside  | 11 | No  | 0 | NA    | NA              | NA                                                                                                                                                                               |
| Exocoetidae | Exocoetidae               | EXO-030 | 2006 | Outside | 17 | No  | 0 | NA    | NA              | NA                                                                                                                                                                               |
| Exocoetidae | Exocoetidae               | EXO-031 | 2006 | Outside | 14 | No  | 0 | NA    | NA              | NA                                                                                                                                                                               |
| Exocoetidae | Exocoetidae               | EXO-032 | 2009 | Outside | 30 | No  | 0 | NA    | NA              | NA                                                                                                                                                                               |
| Exocoetidae | Exocoetidae               | EXO-033 | 2009 | Inside  | 17 | No  | 0 | NA    | NA              | NA                                                                                                                                                                               |
| Exocoetidae | Exocoetidae               | EXO-034 | 2011 | Inside  | 24 | No  | 0 | NA    | NA              | NA                                                                                                                                                                               |
| Exocoetidae | Exocoetidae               | EXO-035 | 2011 | Inside  | 19 | No  | 0 | NA    | NA              | NA                                                                                                                                                                               |
| Exocoetidae | Exocoetidae               | EXO-036 | 2011 | Inside  | 21 | No  | 0 | NA    | NA              | NA                                                                                                                                                                               |
| Exocoetidae | Exocoetidae               | EXO-037 | 2017 | Inside  | 6  | No  | 0 | NA    | NA              | NA                                                                                                                                                                               |
| Exocoetidae | Exocoetidae               | EXO-038 | 2006 | Outside | 30 | No  | 0 | NA    | NA              | NA                                                                                                                                                                               |
| Exocoetidae | Exocoetidae               | EXO-039 | 2006 | Outside | 16 | No  | 0 | NA    | NA              | NA                                                                                                                                                                               |
| Exocoetidae | Exocoetidae               | EXO-040 | 2006 | Outside | 10 | No  | 0 | NA    | NA              | NA                                                                                                                                                                               |
| Exocoetidae | Exocoetidae               | EXO-041 | 2017 | Outside | 12 | No  | 0 | NA    | NA              | NA                                                                                                                                                                               |
| Exocoetidae | Exocoetidae               | EXO-042 | 2017 | Outside | 9  | No  | 0 | NA    | NA              | NA                                                                                                                                                                               |
| Exocoetidae | Exocoetus sp.             | EXO-043 | 2006 | Inside  | 18 | Yes | 1 | fiber | blue            | not analyzed                                                                                                                                                                     |
| Exocoetidae | Exocoetidae               | EXO-044 | 2017 | Inside  | 21 | No  | 0 | NA    | NA              | NA                                                                                                                                                                               |
| Exocoetidae | Exocoetidae               | EXO-045 | 2017 | Inside  | 12 | No  | 0 | NA    | NA              | NA                                                                                                                                                                               |
| Exocoetidae | Exocoetidae               | EXO-046 | 2006 | Outside | 14 | No  | 0 | NA    | NA              | NA                                                                                                                                                                               |
| Exocoetidae | Exocoetidae               | EXO-047 | 2017 | Inside  | 14 | No  | 0 | NA    | NA              | NA                                                                                                                                                                               |
| Exocoetidae | Exocoetidae               | EXO-048 | 2017 | Inside  | 16 | No  | 0 | NA    | NA              | NA                                                                                                                                                                               |
| Exocoetidae | Exocoetidae               | EXO-050 | 2006 | Outside | 15 | No  | 0 | NA    | NA              | NA                                                                                                                                                                               |
| Exocoetidae | Prognichthys sealei       | EXO-051 | 2016 | Inside  | 14 | Yes | 1 | fiber | blue            | not analyzed                                                                                                                                                                     |
| Exocoetidae | Exocoetidae               | EXO-052 | 2018 | Inside  | 25 | No  | 0 | NA    | NA              | NA                                                                                                                                                                               |
| Exocoetidae | Exocoetidae               | EXO-053 | 2018 | Inside  | 19 | No  | 0 | NA    | NA              | NA                                                                                                                                                                               |
| Exocoetidae | Exocoetidae               | EXO-054 | 2017 | Inside  | 10 | No  | 0 | NA    | NA              | NA                                                                                                                                                                               |
| Exocoetidae | Exocoetidae               | EXO-055 | 2018 | Outside | 23 | No  | 0 | NA    | NA              | NA                                                                                                                                                                               |
| Exocoetidae | Exocoetidae               | EXO-056 | 2018 | Outside | 22 | No  | 0 | NA    | NA              | NA                                                                                                                                                                               |
| Exocoetidae | Exocoetidae               | EXO-057 | 2017 | Inside  | 10 | No  | 0 | NA    | NA              | NA                                                                                                                                                                               |
| Exocoetidae | Exocoetidae               | EXO-058 | 2018 | Inside  | 14 | No  | 0 | NA    | NA              | NA                                                                                                                                                                               |
| Exocoetidae | Prognichthys sealei       | EXO-059 | 2018 | Inside  | 19 | Yes | 1 | fiber | translucent     | not analyzed                                                                                                                                                                     |
| Exocoetidae | Exocoetidae               | EXO-060 | 2018 | Inside  | 27 | No  | 0 | NA    | NA              | NA                                                                                                                                                                               |
| Exocoetidae | Exocoetidae               | EXO-061 | 2018 | Inside  | 14 | No  | 0 | NA    | NA              | NA                                                                                                                                                                               |

|             |                            |         |      |         |    |     |   |       |       |                         |
|-------------|----------------------------|---------|------|---------|----|-----|---|-------|-------|-------------------------|
| Exocoetidae | Exocoetidae                | EXO-062 | 2018 | Inside  | 14 | No  | 0 | NA    | NA    | NA                      |
| Exocoetidae | Exocoetidae                | EXO-063 | 2018 | Inside  | 12 | No  | 0 | NA    | NA    | NA                      |
| Exocoetidae | Exocoetidae                | EXO-064 | 2018 | Inside  | 13 | No  | 0 | NA    | NA    | NA                      |
| Exocoetidae | Exocoetidae                | EXO-065 | 2018 | Inside  | 15 | No  | 0 | NA    | NA    | NA                      |
| Exocoetidae | Exocoetidae                | EXO-066 | 2018 | Inside  | 15 | No  | 0 | NA    | NA    | NA                      |
| Exocoetidae | Exocoetidae                | EXO-067 | 2018 | Inside  | 14 | No  | 0 | NA    | NA    | NA                      |
| Exocoetidae | Exocoetidae                | EXO-068 | 2018 | Outside | 14 | No  | 0 | NA    | NA    | NA                      |
| Exocoetidae | Exocoetidae                | EXO-069 | 2018 | Inside  | 14 | No  | 0 | NA    | NA    | NA                      |
| Exocoetidae | Paraexocoetus brachypterus | EXO-070 | 2018 | Inside  | 14 | No  | 0 | NA    | NA    | NA                      |
| Exocoetidae | Prognichthys sealei        | EXO-071 | 2016 | Inside  | 7  | Yes | 1 | fiber | blue  | anthropogenic cellulose |
| Exocoetidae | Exocoetidae                | EXO-072 | 2017 | Inside  | 17 | No  | 0 | NA    | NA    | NA                      |
| Exocoetidae | Exocoetidae                | EXO-073 | 2017 | Inside  | 19 | No  | 0 | NA    | NA    | NA                      |
| Exocoetidae | Exocoetus sp.              | EXO-074 | 2017 | Inside  | 16 | Yes | 1 | fiber | red   | rayon                   |
| Exocoetidae | Cheilopogon sp.            | EXO-075 | 2017 | Inside  | 21 | Yes | 1 | fiber | black | not analyzed            |
| Exocoetidae | Exocoetidae                | EXO-076 | 2017 | Inside  | 16 | No  | 0 | NA    | NA    | NA                      |
| Exocoetidae | Exocoetidae                | EXO-077 | 2017 | Inside  | 17 | No  | 0 | NA    | NA    | NA                      |
| Exocoetidae | Exocoetidae                | EXO-078 | 2017 | Inside  | 14 | No  | 0 | NA    | NA    | NA                      |
| Exocoetidae | Exocoetidae                | EXO-079 | 2017 | Inside  | 15 | No  | 0 | NA    | NA    | NA                      |
| Exocoetidae | Exocoetidae                | EXO-080 | 2017 | Inside  | 16 | No  | 0 | NA    | NA    | NA                      |
| Exocoetidae | Exocoetidae                | EXO-081 | 2017 | Inside  | 18 | No  | 0 | NA    | NA    | NA                      |
| Exocoetidae | Exocoetidae                | EXO-082 | 2005 | Inside  | 20 | No  | 0 | NA    | NA    | NA                      |
| Exocoetidae | Exocoetidae                | EXO-083 | 2005 | Inside  | 16 | No  | 0 | NA    | NA    | NA                      |
| Exocoetidae | Exocoetidae                | EXO-084 | 2018 | Inside  | 9  | No  | 0 | NA    | NA    | NA                      |
| Exocoetidae | Exocoetidae                | EXO-085 | 2018 | Inside  | 7  | No  | 0 | NA    | NA    | NA                      |
| Exocoetidae | Exocoetidae                | EXO-086 | 2018 | Inside  | 7  | No  | 0 | NA    | NA    | NA                      |
| Exocoetidae | Exocoetidae                | EXO-087 | 2017 | Inside  | 15 | No  | 0 | NA    | NA    | NA                      |
| Exocoetidae | Exocoetidae                | EXO-088 | 2017 | Inside  | 15 | No  | 0 | NA    | NA    | NA                      |
| Exocoetidae | Exocoetidae                | EXO-089 | 2017 | Inside  | 16 | No  | 0 | NA    | NA    | NA                      |
| Exocoetidae | Exocoetidae                | EXO-090 | 2017 | Inside  | 20 | No  | 0 | NA    | NA    | NA                      |
| Exocoetidae | Exocoetidae                | EXO-091 | 2017 | Inside  | 13 | No  | 0 | NA    | NA    | NA                      |
| Exocoetidae | Prognichthys sealei        | EXO-092 | 2017 | Inside  | 10 | Yes | 1 | fiber | blue  | not analyzed            |
| Exocoetidae | Exocoetidae                | EXO-093 | 2017 | Inside  | 17 | No  | 0 | NA    | NA    | NA                      |
| Exocoetidae | Exocoetidae                | EXO-094 | 2018 | Inside  | 11 | No  | 0 | NA    | NA    | NA                      |
| Exocoetidae | Exocoetidae                | EXO-095 | 2018 | Inside  | 8  | No  | 0 | NA    | NA    | NA                      |
| Exocoetidae | Exocoetidae                | EXO-096 | 2017 | Inside  | 14 | No  | 0 | NA    | NA    | NA                      |
| Exocoetidae | Exocoetidae                | EXO-097 | 2017 | Inside  | 9  | No  | 0 | NA    | NA    | NA                      |
| Exocoetidae | Exocoetidae                | EXO-098 | 2017 | Inside  | 8  | No  | 0 | NA    | NA    | NA                      |
| Exocoetidae | Exocoetidae                | EXO-099 | 2018 | Inside  | 18 | No  | 0 | NA    | NA    | NA                      |
| Exocoetidae | Cheilopogon furcatus       | EXO-100 | 2018 | Inside  | 16 | Yes | 1 | fiber | blue  | not analyzed            |
| Exocoetidae | Exocoetidae                | EXO-101 | 2018 | Inside  | 15 | No  | 0 | NA    | NA    | NA                      |
| Exocoetidae | Exocoetidae                | EXO-102 | 2018 | Outside | 20 | No  | 0 | NA    | NA    | NA                      |
| Exocoetidae | Exocoetidae                | EXO-103 | 2018 | Inside  | 10 | No  | 0 | NA    | NA    | NA                      |
| Exocoetidae | Exocoetidae                | EXO-104 | 2018 | Inside  | 15 | No  | 0 | NA    | NA    | NA                      |
| Exocoetidae | Cheilopogon sp.            | EXO-105 | 2018 | Inside  | 14 | Yes | 1 | fiber | red   | anthropogenic cellulose |
| Exocoetidae | Exocoetidae                | EXO-106 | 2018 | Inside  | 7  | No  | 0 | NA    | NA    | NA                      |
| Exocoetidae | Exocoetidae                | EXO-107 | 2011 | Outside | 34 | No  | 0 | NA    | NA    | NA                      |
| Exocoetidae | Exocoetidae                | EXO-108 | 2011 | Outside | 24 | No  | 0 | NA    | NA    | NA                      |
| Exocoetidae | Exocoetidae                | EXO-109 | 2011 | Outside | 20 | No  | 0 | NA    | NA    | NA                      |
| Exocoetidae | Exocoetidae                | EXO-110 | 2011 | Outside | 21 | No  | 0 | NA    | NA    | NA                      |
| Exocoetidae | Exocoetidae                | EXO-111 | 2009 | Inside  | 30 | No  | 0 | NA    | NA    | NA                      |
| Exocoetidae | Exocoetidae                | EXO-112 | 2009 | Inside  | 22 | Yes | 1 | fiber | blue  | not analyzed            |
| Exocoetidae | Exocoetidae                | EXO-113 | 2011 | Inside  | 38 | Yes | 1 | fiber | blue  | not analyzed            |

|               |                            |         |      |         |    |     |   |       |             |                         |
|---------------|----------------------------|---------|------|---------|----|-----|---|-------|-------------|-------------------------|
| Exocoetidae   | Exocoetidae                | EXO-114 | 2004 | Inside  | 41 | No  | 0 | NA    | NA          | NA                      |
| Exocoetidae   | Exocoetidae                | EXO-115 | 2004 | Inside  | 37 | No  | 0 | NA    | NA          | NA                      |
| Exocoetidae   | Exocoetidae                | EXO-116 | 2018 | Outside | 14 | No  | 0 | NA    | NA          | NA                      |
| Exocoetidae   | Exocoetidae                | EXO-117 | 2009 | Outside | 21 | No  | 0 | NA    | NA          | NA                      |
| Exocoetidae   | Exocoetidae                | EXO-118 | 2009 | Outside | 15 | No  | 0 | NA    | NA          | NA                      |
| Exocoetidae   | Exocoetidae                | EXO-119 | 2009 | Outside | 19 | No  | 0 | NA    | NA          | NA                      |
| Exocoetidae   | Exocoetidae                | EXO-120 | 2011 | Outside | 25 | No  | 0 | NA    | NA          | NA                      |
| Exocoetidae   | Exocoetidae                | EXO-121 | 2011 | Outside | 10 | No  | 0 | NA    | NA          | NA                      |
| Exocoetidae   | Exocoetidae                | EXO-122 | 2011 | Outside | 11 | No  | 0 | NA    | NA          | NA                      |
| Exocoetidae   | Exocoetidae                | EXO-123 | 2009 | Outside | 14 | No  | 0 | NA    | NA          | NA                      |
| Exocoetidae   | Exocoetidae                | EXO-124 | 2016 | Outside | 8  | No  | 0 | NA    | NA          | NA                      |
| Exocoetidae   | Exocoetidae                | EXO-125 | 2005 | Outside | 14 | No  | 0 | NA    | NA          | NA                      |
| Exocoetidae   | Exocoetidae                | EXO-126 | 2005 | Outside | 12 | No  | 0 | NA    | NA          | NA                      |
| Exocoetidae   | Exocoetidae                | EXO-127 | 2009 | Outside | 13 | No  | 0 | NA    | NA          | NA                      |
| Exocoetidae   | Exocoetidae                | EXO-128 | 2009 | Outside | 13 | No  | 0 | NA    | NA          | NA                      |
| Exocoetidae   | Exocoetidae                | EXO-129 | 2009 | Outside | 14 | No  | 0 | NA    | NA          | NA                      |
| Exocoetidae   | Exocoetidae                | EXO-130 | 2009 | Outside | 19 | No  | 0 | NA    | NA          | NA                      |
| Exocoetidae   | Exocoetidae                | EXO-131 | 2009 | Outside | 14 | No  | 0 | NA    | NA          | NA                      |
| Exocoetidae   | Exocoetidae                | EXO-132 | 2009 | Outside | 14 | No  | 0 | NA    | NA          | NA                      |
| Exocoetidae   | Exocoetidae                | EXO-133 | 2011 | Outside | 8  | No  | 0 | NA    | NA          | NA                      |
| Exocoetidae   | Exocoetidae                | EXO-133 | 2018 | Outside | 14 | No  | 0 | NA    | NA          | NA                      |
| Istiophoridae | Istiophoridae              | IST-001 | 2017 | Inside  | 14 | No  | 0 | NA    | NA          | NA                      |
| Istiophoridae | Istiophoridae              | IST-002 | 2017 | Inside  | 13 | No  | 0 | NA    | NA          | NA                      |
| Istiophoridae | Istiophoridae              | IST-003 | 2017 | Inside  | 12 | No  | 0 | NA    | NA          | NA                      |
| Istiophoridae | Istiophoridae              | IST-004 | 2017 | Inside  | 12 | No  | 0 | NA    | NA          | NA                      |
| Istiophoridae | Istiophoridae              | IST-005 | 2006 | Outside | 35 | No  | 0 | NA    | NA          | NA                      |
| Istiophoridae | Istiophoridae              | IST-006 | 2004 | Outside | 5  | No  | 0 | NA    | NA          | NA                      |
| Istiophoridae | Istiophoridae              | IST-007 | 2004 | Inside  | 13 | No  | 0 | NA    | NA          | NA                      |
| Istiophoridae | Istiophoridae              | IST-008 | 2004 | Outside | 5  | No  | 0 | NA    | NA          | NA                      |
| Istiophoridae | Istiophoridae              | IST-010 | 2004 | Outside | 8  | No  | 0 | NA    | NA          | NA                      |
| Istiophoridae | Istiophoridae              | IST-011 | 2004 | Inside  | 20 | Yes | 1 | fiber | blue        | anthropogenic cellulose |
| Istiophoridae | Istiophoridae              | IST-012 | 2004 | Inside  | 13 | No  | 0 | NA    | NA          | NA                      |
| Istiophoridae | Istiophoridae              | IST-014 | 2004 | Inside  | 8  | No  | 0 | NA    | NA          | NA                      |
| Istiophoridae | Istiophoridae              | IST-016 | 2003 | Inside  | 24 | No  | 0 | NA    | NA          | NA                      |
| Istiophoridae | Istiophoridae              | IST-017 | 2004 | Outside | 7  | No  | 0 | NA    | NA          | NA                      |
| Istiophoridae | Istiophoridae              | IST-018 | 2004 | Outside | 5  | No  | 0 | NA    | NA          | NA                      |
| Istiophoridae | Istiophoridae              | IST-019 | 2003 | Outside | 15 | Yes | 1 | fiber | translucent | not analyzed            |
| Istiophoridae | Istiophoridae              | IST-021 | 2004 | Outside | 7  | No  | 0 | NA    | NA          | NA                      |
| Istiophoridae | Istiophoridae              | IST-022 | 2003 | Outside | 16 | No  | 0 | NA    | NA          | NA                      |
| Istiophoridae | Istiophoridae              | IST-023 | 2004 | Outside | 7  | No  | 0 | NA    | NA          | NA                      |
| Istiophoridae | Tetrapturus angustirostris | IST-024 | 2003 | Outside | 24 | No  | 0 | NA    | NA          | NA                      |
| Istiophoridae | Tetrapturus angustirostris | IST-026 | 2003 | Outside | 9  | No  | 0 | NA    | NA          | NA                      |
| Istiophoridae | Istiophoridae              | IST-027 | 2004 | Outside | 6  | No  | 0 | NA    | NA          | NA                      |
| Istiophoridae | Tetrapturus angustirostris | IST-028 | 2003 | Inside  | 20 | No  | 0 | NA    | NA          | NA                      |
| Istiophoridae | Istiophoridae              | IST-029 | 2004 | Outside | 10 | No  | 0 | NA    | NA          | NA                      |
| Istiophoridae | Istiophoridae              | IST-030 | 2003 | Inside  | 22 | No  | 0 | NA    | NA          | NA                      |
| Istiophoridae | Istiophoridae              | IST-031 | 2004 | Outside | 7  | No  | 0 | NA    | NA          | NA                      |
| Istiophoridae | Istiophoridae              | IST-032 | 2004 | Outside | 9  | No  | 0 | NA    | NA          | NA                      |
| Istiophoridae | Istiophoridae              | IST-033 | 2004 | Outside | 6  | No  | 0 | NA    | NA          | NA                      |
| Istiophoridae | Istiophoridae              | IST-034 | 2004 | Outside | 6  | No  | 0 | NA    | NA          | NA                      |
| Istiophoridae | Tetrapturus angustirostris | IST-035 | 2003 | Inside  | 27 | No  | 0 | NA    | NA          | NA                      |
| Istiophoridae | Istiophoridae              | IST-037 | 2003 | Inside  | 15 | No  | 0 | NA    | NA          | NA                      |
| Istiophoridae | Tetrapturus angustirostris | IST-038 | 2003 | Inside  | 18 | No  | 0 | NA    | NA          | NA                      |

|               |                            |         |      |         |    |     |   |       |             |                                           |
|---------------|----------------------------|---------|------|---------|----|-----|---|-------|-------------|-------------------------------------------|
| Istiophoridae | Istiophoridae              | IST-039 | 2000 | Inside  | 27 | No  | 0 | NA    | NA          | NA                                        |
| Istiophoridae | Tetrapturus angustirostris | IST-040 | 2003 | Outside | 20 | No  | 0 | NA    | NA          | NA                                        |
| Istiophoridae | Tetrapturus angustirostris | IST-041 | 2003 | Outside | 14 | No  | 0 | NA    | NA          | NA                                        |
| Istiophoridae | Istiophoridae              | IST-042 | 2000 | Outside | 17 | No  | 0 | NA    | NA          | NA                                        |
| Istiophoridae | Tetrapturus angustirostris | IST-043 | 2003 | Inside  | 10 | Yes | 1 | fiber | translucent | unknown cellulose                         |
| Istiophoridae | Tetrapturus angustirostris | IST-044 | 2003 | Outside | 13 | No  | 0 | NA    | NA          | NA                                        |
| Istiophoridae | Tetrapturus angustirostris | IST-045 | 2003 | Outside | 13 | No  | 0 | NA    | NA          | NA                                        |
| Istiophoridae | Tetrapturus angustirostris | IST-046 | 2003 | Outside | 16 | No  | 0 | NA    | NA          | NA                                        |
| Istiophoridae | Istiophoridae              | IST-047 | 2001 | Outside | 17 | Yes | 1 | fiber | blue        | anthropogenic pigment on unknown material |
| Istiophoridae | Tetrapturus angustirostris | IST-049 | 2003 | Outside | 29 | No  | 0 | NA    | NA          | NA                                        |
| Istiophoridae | Istiophoridae              | IST-050 | 2000 | Inside  | 14 | No  | 0 | NA    | NA          | NA                                        |
| Istiophoridae | Istiophoridae              | IST-051 | 2000 | Outside | 13 | No  | 0 | NA    | NA          | NA                                        |
| Istiophoridae | Istiophoridae              | IST-052 | 2003 | Outside | 10 | No  | 0 | NA    | NA          | NA                                        |
| Istiophoridae | Istiophoridae              | IST-53  | 2003 | Outside | 11 | No  | 0 | NA    | NA          | NA                                        |
| Istiophoridae | Istiophoridae              | IST-55  | 2000 | Inside  | 27 | No  | 0 | NA    | NA          | NA                                        |
| Istiophoridae | Istiophoridae              | IST-56  | 2000 | Outside | 14 | No  | 0 | NA    | NA          | NA                                        |
| Istiophoridae | Istiophoridae              | IST-57  | 2003 | Outside | 14 | Yes | 1 | fiber | blue        | anthropogenic cellulose                   |
| Istiophoridae | Istiophoridae              | IST-58  | 2003 | Outside | 12 | No  | 0 | NA    | NA          | NA                                        |
| Istiophoridae | Istiophoridae              | IST-59  | 1999 | Inside  | 24 | No  | 0 | NA    | NA          | NA                                        |
| Istiophoridae | Istiophoridae              | IST-60  | 2003 | Outside | 16 | No  | 0 | NA    | NA          | NA                                        |
| Istiophoridae | Istiophoridae              | IST-61  | 2003 | Inside  | 14 | No  | 0 | NA    | NA          | NA                                        |
| Istiophoridae | Istiophoridae              | IST-62  | 2003 | Outside | 12 | No  | 0 | NA    | NA          | NA                                        |
| Istiophoridae | Istiophoridae              | IST-63  | 1999 | Outside | 18 | No  | 0 | NA    | NA          | NA                                        |
| Istiophoridae | Istiophoridae              | IST-64  | 2004 | Outside | 7  | No  | 0 | NA    | NA          | NA                                        |
| Istiophoridae | Istiophoridae              | IST-65  | 2002 | Inside  | 16 | No  | 0 | NA    | NA          | NA                                        |
| Mullidae      | Mullidae                   | MUL-001 | 2018 | Inside  | 40 | No  | 0 | NA    | NA          | NA                                        |
| Mullidae      | Mullidae                   | MUL-002 | 2017 | Inside  | 23 | No  | 0 | NA    | NA          | NA                                        |
| Mullidae      | Mullidae                   | MUL-003 | 2017 | Inside  | 22 | No  | 0 | NA    | NA          | NA                                        |
| Mullidae      | Mullidae                   | MUL-004 | 2017 | Outside | 13 | No  | 0 | NA    | NA          | NA                                        |
| Mullidae      | Mullidae                   | MUL-005 | 2017 | Inside  | 22 | No  | 0 | NA    | NA          | NA                                        |
| Mullidae      | Mullidae                   | MUL-006 | 2017 | Inside  | 25 | No  | 0 | NA    | NA          | NA                                        |
| Mullidae      | Mullidae                   | MUL-007 | 2018 | Outside | 15 | No  | 0 | NA    | NA          | NA                                        |
| Mullidae      | Mullidae                   | MUL-008 | 2018 | Outside | 11 | No  | 0 | NA    | NA          | NA                                        |
| Mullidae      | Mullidae                   | MUL-009 | 2017 | Inside  | 12 | No  | 0 | NA    | NA          | NA                                        |
| Mullidae      | Mullidae                   | MUL-010 | 2017 | Outside | 6  | No  | 0 | NA    | NA          | NA                                        |
| Mullidae      | Mullidae                   | MUL-011 | 2017 | Outside | 11 | No  | 0 | NA    | NA          | NA                                        |
| Mullidae      | Mullidae                   | MUL-012 | 2017 | Inside  | 10 | No  | 0 | NA    | NA          | NA                                        |
| Mullidae      | Mullidae                   | MUL-013 | 2017 | Inside  | 12 | No  | 0 | NA    | NA          | NA                                        |
| Mullidae      | Mullidae                   | MUL-014 | 2017 | Inside  | 13 | No  | 0 | NA    | NA          | NA                                        |
| Mullidae      | Mullidae                   | MUL-015 | 2016 | Outside | 12 | No  | 0 | NA    | NA          | NA                                        |
| Mullidae      | Mullidae                   | MUL-016 | 2016 | Outside | 11 | No  | 0 | NA    | NA          | NA                                        |
| Mullidae      | Mullidae                   | MUL-017 | 2016 | Inside  | 9  | No  | 0 | NA    | NA          | NA                                        |
| Mullidae      | Mullidae                   | MUL-018 | 2016 | Outside | 11 | No  | 0 | NA    | NA          | NA                                        |
| Mullidae      | Mullidae                   | MUL-019 | 2017 | Inside  | 8  | No  | 0 | NA    | NA          | NA                                        |
| Mullidae      | Mullidae                   | MUL-020 | 2017 | Inside  | 23 | No  | 0 | NA    | NA          | NA                                        |
| Mullidae      | Mullidae                   | MUL-021 | 2017 | Inside  | 14 | No  | 0 | NA    | NA          | NA                                        |
| Mullidae      | Mullidae                   | MUL-022 | 2017 | Inside  | 12 | No  | 0 | NA    | NA          | NA                                        |
| Mullidae      | Mullidae                   | MUL-024 | 2011 | Inside  | 16 | No  | 0 | NA    | NA          | NA                                        |
| Mullidae      | Mullidae                   | MUL-025 | 2006 | Outside | 14 | No  | 0 | NA    | NA          | NA                                        |
| Mullidae      | Mullidae                   | MUL-026 | 2016 | Inside  | 10 | No  | 0 | NA    | NA          | NA                                        |
| Mullidae      | Mullidae                   | MUL-027 | 2009 | Outside | 13 | No  | 0 | NA    | NA          | NA                                        |
| Mullidae      | Mullidae                   | MUL-028 | 2005 | Inside  | 10 | No  | 0 | NA    | NA          | NA                                        |

|               |               |         |      |         |    |     |   |       |             |                         |
|---------------|---------------|---------|------|---------|----|-----|---|-------|-------------|-------------------------|
| Mullidae      | Mullidae      | MUL-029 | 2011 | Outside | 11 | No  | 0 | NA    | NA          | NA                      |
| Mullidae      | Mullidae      | MUL-030 | 2011 | Inside  | 16 | No  | 0 | NA    | NA          | NA                      |
| Mullidae      | Mullidae      | MUL-031 | 2009 | Outside | 18 | No  | 0 | NA    | NA          | NA                      |
| Mullidae      | Mullidae      | MUL-032 | 2011 | Outside | 15 | No  | 0 | NA    | NA          | NA                      |
| Mullidae      | Mullidae      | MUL-033 | 2006 | Outside | 13 | No  | 0 | NA    | NA          | NA                      |
| Mullidae      | Mullidae      | MUL-034 | 2006 | Inside  | 16 | No  | 0 | NA    | NA          | NA                      |
| Mullidae      | Mullidae      | MUL-035 | 2011 | Inside  | 13 | No  | 0 | NA    | NA          | NA                      |
| Mullidae      | Mullidae      | MUL-036 | 2006 | Outside | 11 | No  | 0 | NA    | NA          | NA                      |
| Mullidae      | Mullidae      | MUL-037 | 2006 | Outside | 13 | No  | 0 | NA    | NA          | NA                      |
| Mullidae      | Mullidae      | MUL-038 | 2006 | Outside | 14 | No  | 0 | NA    | NA          | NA                      |
| Mullidae      | Mullidae      | MUL-039 | 2009 | Inside  | 15 | No  | 0 | NA    | NA          | NA                      |
| Mullidae      | Mullidae      | MUL-040 | 2011 | Outside | 14 | No  | 0 | NA    | NA          | NA                      |
| Mullidae      | Mullidae      | MUL-041 | 2011 | Outside | 14 | No  | 0 | NA    | NA          | NA                      |
| Mullidae      | Mullidae      | MUL-042 | 2011 | Inside  | 14 | No  | 0 | NA    | NA          | NA                      |
| Mullidae      | Mullidae      | MUL-043 | 2011 | Inside  | 15 | No  | 0 | NA    | NA          | NA                      |
| Mullidae      | Mullidae      | MUL-044 | 2011 | Outside | 16 | No  | 0 | NA    | NA          | NA                      |
| Mullidae      | Mullidae      | MUL-045 | 2011 | Outside | 16 | No  | 0 | NA    | NA          | NA                      |
| Mullidae      | Mullidae      | MUL-046 | 2011 | Outside | 11 | No  | 0 | NA    | NA          | NA                      |
| Mullidae      | Mullidae      | MUL-047 | 2011 | Outside | 19 | No  | 0 | NA    | NA          | NA                      |
| Mullidae      | Mullidae      | MUL-048 | 2011 | Outside | 18 | No  | 0 | NA    | NA          | NA                      |
| Mullidae      | Mullidae      | MUL-049 | 2011 | Outside | 11 | No  | 0 | NA    | NA          | NA                      |
| Pomacentridae | Abudefduf sp. | ABU-001 | 2016 | Inside  | 25 | No  | 0 | NA    | NA          | NA                      |
| Pomacentridae | Abudefduf sp. | ABU-002 | 2016 | Inside  | 18 | No  | 0 | NA    | NA          | NA                      |
| Pomacentridae | Abudefduf sp. | ABU-003 | 2016 | Inside  | 18 | No  | 0 | NA    | NA          | NA                      |
| Pomacentridae | Abudefduf sp. | ABU-004 | 2016 | Inside  | 14 | No  | 0 | NA    | NA          | NA                      |
| Pomacentridae | Abudefduf sp. | ABU-005 | 2016 | Inside  | 13 | No  | 0 | NA    | NA          | NA                      |
| Pomacentridae | Abudefduf sp. | ABU-006 | 2016 | Inside  | 14 | No  | 0 | NA    | NA          | NA                      |
| Pomacentridae | Abudefduf sp. | ABU-007 | 2016 | Inside  | 15 | No  | 0 | NA    | NA          | NA                      |
| Pomacentridae | Abudefduf sp. | ABU-008 | 2016 | Inside  | 14 | No  | 0 | NA    | NA          | NA                      |
| Pomacentridae | Abudefduf sp. | ABU-009 | 2016 | Inside  | 15 | No  | 0 | NA    | NA          | NA                      |
| Pomacentridae | Abudefduf sp. | ABU-010 | 2016 | Outside | 15 | No  | 0 | NA    | NA          | NA                      |
| Pomacentridae | Abudefduf sp. | ABU-011 | 2016 | Inside  | 13 | No  | 0 | NA    | NA          | NA                      |
| Pomacentridae | Abudefduf sp. | ABU-012 | 2016 | Inside  | 12 | Yes | 1 | fiber | black       | not analyzed            |
| Pomacentridae | Abudefduf sp. | ABU-013 | 2016 | Outside | 15 | No  | 0 | NA    | NA          | NA                      |
| Pomacentridae | Abudefduf sp. | ABU-014 | 2017 | Inside  | 14 | No  | 0 | NA    | NA          | NA                      |
| Pomacentridae | Abudefduf sp. | ABU-015 | 2017 | Inside  | 17 | No  | 0 | NA    | NA          | NA                      |
| Pomacentridae | Abudefduf sp. | ABU-016 | 2017 | Inside  | 17 | No  | 0 | NA    | NA          | NA                      |
| Pomacentridae | Abudefduf sp. | ABU-017 | 2017 | Inside  | 19 | No  | 0 | NA    | NA          | NA                      |
| Pomacentridae | Abudefduf sp. | ABU-018 | 2017 | Inside  | 13 | No  | 0 | NA    | NA          | NA                      |
| Pomacentridae | Abudefduf sp. | ABU-019 | 2017 | Inside  | 17 | No  | 0 | NA    | NA          | NA                      |
| Pomacentridae | Abudefduf sp. | ABU-020 | 2017 | Outside | 13 | No  | 0 | NA    | NA          | NA                      |
| Pomacentridae | Abudefduf sp. | ABU-021 | 2017 | Inside  | 14 | No  | 0 | NA    | NA          | NA                      |
| Pomacentridae | Abudefduf sp. | ABU-022 | 2017 | Inside  | 22 | No  | 0 | NA    | NA          | NA                      |
| Pomacentridae | Abudefduf sp. | ABU-023 | 2018 | Inside  | 14 | No  | 0 | NA    | NA          | NA                      |
| Pomacentridae | Abudefduf sp. | ABU-024 | 2018 | Inside  | 16 | No  | 0 | NA    | NA          | NA                      |
| Pomacentridae | Abudefduf sp. | ABU-025 | 2018 | Inside  | 20 | Yes | 1 | fiber | blue        | anthropogenic cellulose |
| Pomacentridae | Abudefduf sp. | ABU-026 | 2018 | Inside  | 13 | No  | 0 | NA    | NA          | NA                      |
| Pomacentridae | Abudefduf sp. | ABU-027 | 2016 | Inside  | 26 | Yes | 1 | fiber | translucent | polyester               |
| Pomacentridae | Abudefduf sp. | ABU-028 | 2016 | Inside  | 12 | No  | 0 | NA    | NA          | NA                      |
| Pomacentridae | Abudefduf sp. | ABU-029 | 2016 | Inside  | 12 | No  | 0 | NA    | NA          | NA                      |
| Pomacentridae | Abudefduf sp. | ABU-030 | 2016 | Inside  | 13 | No  | 0 | NA    | NA          | NA                      |
| Pomacentridae | Abudefduf sp. | ABU-031 | 2016 | Inside  | 22 | No  | 0 | NA    | NA          | NA                      |
| Pomacentridae | Abudefduf sp. | ABU-032 | 2016 | Inside  | 13 | No  | 0 | NA    | NA          | NA                      |





|               |                 |         |      |         |    |     |   |       |             |                         |
|---------------|-----------------|---------|------|---------|----|-----|---|-------|-------------|-------------------------|
| Pomacentridae | Abudefduf sp.   | ABU-086 | 2011 | Outside | 10 | No  | 0 | NA    | NA          | NA                      |
| Pomacentridae | Abudefduf sp.   | ABU-087 | 2011 | Outside | 10 | No  | 0 | NA    | NA          | NA                      |
| Pomacentridae | Abudefduf sp.   | ABU-088 | 2011 | Outside | 10 | No  | 0 | NA    | NA          | NA                      |
| Pomacentridae | Abudefduf sp.   | ABU-089 | 2011 | Outside | 10 | No  | 0 | NA    | NA          | NA                      |
| Pomacentridae | Abudefduf sp.   | ABU-90  | 2011 | Outside | 11 | No  | 0 | NA    | NA          | NA                      |
| Xiphiidae     | Xiphias gladius | XIP-001 | 2004 | Inside  | 25 | No  | 0 | NA    | NA          | NA                      |
| Xiphiidae     | Xiphias gladius | XIP-002 | 2004 | Outside | 23 | No  | 0 | NA    | NA          | NA                      |
| Xiphiidae     | Xiphias gladius | XIP-003 | 2004 | Inside  | 20 | No  | 0 | NA    | NA          | NA                      |
| Xiphiidae     | Xiphias gladius | XIP-004 | 2004 | Inside  | 27 | No  | 0 | NA    | NA          | NA                      |
| Xiphiidae     | Xiphias gladius | XIP-005 | 2003 | Inside  | 19 | No  | 0 | NA    | NA          | NA                      |
| Xiphiidae     | Xiphias gladius | XIP-006 | 2002 | Outside | 24 | No  | 0 | NA    | NA          | NA                      |
| Xiphiidae     | Xiphias gladius | XIP-007 | 2001 | Inside  | 19 | No  | 0 | NA    | NA          | NA                      |
| Xiphiidae     | Xiphias gladius | XIP-008 | 2002 | Outside | 34 | No  | 0 | NA    | NA          | NA                      |
| Xiphiidae     | Xiphias gladius | XIP-009 | 2001 | Inside  | 48 | No  | 0 | NA    | NA          | NA                      |
| Xiphiidae     | Xiphias gladius | XIP-010 | 2000 | Inside  | 41 | Yes | 1 | fiber | translucent | not analyzed            |
| Xiphiidae     | Xiphias gladius | XIP-012 | 2003 | Outside | 28 | Yes | 1 | fiber | blue        | anthropogenic cellulose |
| Xiphiidae     | Xiphias gladius | XIP-013 | 2002 | Inside  | 38 | No  | 0 | NA    | NA          | NA                      |
| Xiphiidae     | Xiphias gladius | XIP-014 | 2002 | Outside | 35 | No  | 0 | NA    | NA          | NA                      |
| Xiphiidae     | Xiphias gladius | XIP-015 | 2001 | Inside  | 41 | No  | 0 | NA    | NA          | NA                      |
| Xiphiidae     | Xiphias gladius | XIP-016 | 1997 | Outside | 25 | No  | 0 | NA    | NA          | NA                      |
| Xiphiidae     | Xiphias gladius | XIP-023 | 1997 | Outside | 40 | No  | 0 | NA    | NA          | NA                      |
| Xiphiidae     | Xiphias gladius | XIP-031 | 2009 | Inside  | 40 | No  | 0 | NA    | NA          | NA                      |
| Xiphiidae     | Xiphias gladius | XIP-032 | 2009 | Outside | 21 | No  | 0 | NA    | NA          | NA                      |
| Xiphiidae     | Xiphias gladius | XIP-033 | 2009 | Outside | 30 | No  | 0 | NA    | NA          | NA                      |
| Xiphiidae     | Xiphias gladius | XIP-034 | 2009 | Outside | 20 | No  | 0 | NA    | NA          | NA                      |
| Xiphiidae     | Xiphias gladius | XIP-035 | 1998 | Inside  | 24 | No  | 0 | NA    | NA          | NA                      |
| Xiphiidae     | Xiphias gladius | XIP-036 | 2009 | Outside | 30 | No  | 0 | NA    | NA          | NA                      |
| Xiphiidae     | Xiphias gladius | XIP-037 | 2000 | Outside | 20 | No  | 0 | NA    | NA          | NA                      |
| Xiphiidae     | Xiphias gladius | XIP-038 | 2001 | Inside  | 28 | No  | 0 | NA    | NA          | NA                      |
| Xiphiidae     | Xiphias gladius | XIP-039 | 2001 | Inside  | 60 | No  | 0 | NA    | NA          | NA                      |
| Xiphiidae     | Xiphias gladius | XIP-040 | 2001 | Inside  | 21 | No  | 0 | NA    | NA          | NA                      |
| Xiphiidae     | Xiphias gladius | XIP-041 | 2000 | Outside | 24 | No  | 0 | NA    | NA          | NA                      |
| Xiphiidae     | Xiphias gladius | XIP-042 | 2000 | Outside | 52 | No  | 0 | NA    | NA          | NA                      |
| Xiphiidae     | Xiphias gladius | XIP-043 | 2000 | Inside  | 32 | No  | 0 | NA    | NA          | NA                      |
| Xiphiidae     | Xiphias gladius | XIP-044 | 2000 | Outside | 30 | No  | 0 | NA    | NA          | NA                      |
| Xiphiidae     | Xiphias gladius | XIP-045 | 2000 | Outside | 32 | No  | 0 | NA    | NA          | NA                      |
| Xiphiidae     | Xiphias gladius | XIP-046 | 2001 | Outside | 32 | No  | 0 | NA    | NA          | NA                      |
| Xiphiidae     | Xiphias gladius | XIP-048 | 2000 | Inside  | 28 | No  | 0 | NA    | NA          | NA                      |
| Xiphiidae     | Xiphias gladius | XIP-049 | 1997 | Outside | 32 | Yes | 1 | fiber | blue        | not analyzed            |
